# Supplementary material
Source: publisher figshare collection journal article supplement (https://frontiersin.figshare.com/ndownloader/files/34442951)
Supplement: Supplementary file 1 [file 34442951]

## Sheet: Sheet1
		城市生态效率	高技术产业集聚	经济发展水平	产业结构	人口密度	科学技术
北京	2004	1.09094	23.119	37058	60	2623	0.309471
北京	2005	1.16788	19.2809	45444	69.15	937	0.228626
北京	2006	1.26897	20.468	50467	70.91	1094	0.245529
北京	2007	1.4428	21.6257	58204	72.09	1132	0.970158
北京	2008	1.73136	24.4348	63029	73.25	1181	1.06968
北京	2009	1.86055	26.6711	70452	75.53	1224	1.03931
北京	2010	2.14783	27.8715	75943	75.11	1383	1.26768
北京	2011	2.29436	30.8147	81658	76.07	1428	1.12648
北京	2012	2.40821	32.9352	87475	76.46	1464	1.11829
北京	2013	2.66858	36.3476	148181	76.85	1498	1.20342
北京	2014	2.95028	36.4378	99995	77.95	1525	1.32537
北京	2015	3.51989	36.163	106497	79.65	1541	1.25049
北京	2016	4.87966	42.0298	118198	80.23	1145	1.11332
北京	2017	6.5915	43.4281	129204	80.56	1144	1.29116
北京	2018	7.12932	43.7126	140211	80.98	1135.53	1.40459
北京	2019	9.43581	42.0139	164220	83.52	1136.5	1.22534
天津	2004	1.04949	4.34564	31550	43.2	852	0.078158
天津	2005	1.19243	4.4547	35783	41.49	863	0.0756946
天津	2006	1.24182	4.48938	41163	40.21	2590	0.0758474
天津	2007	1.35586	4.94898	46122	40.54	2912	0.44231
天津	2008	1.59594	5.43367	55473	37.94	2858	0.450917
天津	2009	1.75848	5.02551	62574	45.27	2716	0.451954
天津	2010	2.03172	5.5017	72994	45.95	2752	0.468895
天津	2011	2.14687	4.54082	85213	46.16	2636	0.532154
天津	2012	2.37989	7.03231	93173	46.99	2782	0.592939
天津	2013	2.67562	9.02073	143129	48.05	2843	0.645843
天津	2014	2.86358	8.97038	105231	49.34	3328	0.693058
天津	2015	2.94796	9.49694	107960	52.15	3492	0.730552
天津	2016	3.24721	9.63917	115053	56.44	3639	0.699867
天津	2017	3.49162	10.0227	117882	58.15	3276	0.625152
天津	2018	3.60218	9.18367	120711	58.62	5016.3	0.561997
天津	2019	2.59857	9.26205	90371	63.46	4939.2	0.7796
石家庄市	2004	1.12441	1.27461	17871	37.27	4554	0.0234349
石家庄市	2005	1.16938	1.31878	18671	37.69	4704	0.0252914
石家庄市	2006	1.23015	1.31878	21000	38.94	10636	0.0224116
石家庄市	2007	1.31347	1.32509	24243	38.92	10831	0.133718
石家庄市	2008	1.63624	1.33771	28923	38.9	11005	0.144174
石家庄市	2009	1.7448	1.40081	30428	40.15	11880	0.129052
石家庄市	2010	1.94112	1.40712	33915	40.51	11540	0.132375
石家庄市	2011	1.92575	1.54594	39919	40.07	8128	0.154812
石家庄市	2012	1.95087	1.87405	43552	40.16	8210	0.166788
石家庄市	2013	2.0824	2.01918	48491	41.44	8220	0.164619
石家庄市	2014	2.0264	2.81707	48970	43.81	5431	0.141014
石家庄市	2015	2.13744	2.99073	51043	45.84	5439	0.166309
石家庄市	2016	2.42505	2.99012	55177	46.44	5467	0.206318
石家庄市	2017	2.74003	2.54125	57024	50.4409	5473	0.162878
石家庄市	2018	2.66371	2.47918	55723	55.51	5480.04	0.195179
石家庄市	2019	2.38432	2.18848	52859	60.74	6491.01	0.212346
唐山市	2004	1.13292	0.259798	22965	30.62	1489	0.0137241
唐山市	2005	1.20249	0.274644	28006	31.06	1508	0.0123691
唐山市	2006	1.22114	0.282067	32429	31.14	1598	0.0139153
唐山市	2007	1.27845	0.282067	37765	32.25	1573	0.106116
唐山市	2008	1.47248	0.282067	48054	31.11	1602	0.109621
唐山市	2009	1.55258	0.282067	51179	32.8	1602	0.101167
唐山市	2010	1.75656	0.296912	59389	32.42	1602	0.106794
唐山市	2011	2.1967	0.378563	71565	30.98	1602	0.113838
唐山市	2012	2.10591	0.408254	76643	31.72	1605	0.180658
唐山市	2013	2.20435	0.603988	82831	32.27	1605	0.147809
唐山市	2014	2.17344	0.569626	80450	33.27	1605	0.131051
唐山市	2015	2.15339	0.607482	78398	35.55	1607	0.105198
唐山市	2016	2.19152	0.609041	81239	35.5	1609	0.135081
唐山市	2017	2.47959	0.39576	82972	34.8494	1455	0.108895
唐山市	2018	2.65171	0.364699	87855	38.02	7063	0.128048
唐山市	2019	2.57308	0.561135	86667	39.85	7006.3	0.142541
邯郸市	2004	1.16546	0.613497	10887	34.5	3205	0.0163269
邯郸市	2005	1.32363	0.596916	13410	36.04	3245	0.0168325
邯郸市	2006	1.43873	0.621787	15642	35.19	3465	0.0157489
邯郸市	2007	1.59336	0.646659	18406	34.44	3516	0.0980082
邯郸市	2008	2.00616	0.746145	22651	33.32	3379	0.0896871
邯郸市	2009	2.02776	0.762726	22779	33.86	3396	0.0999613
邯郸市	2010	2.21572	0.787597	26143	32.75	3510	0.0910797
邯郸市	2011	2.48082	0.83734	30270	32.66	3526	0.0957287
邯郸市	2012	2.60507	0.845421	32650	33.71	3745	0.1606
邯郸市	2013	2.33997	0.878574	30800	35.76	3950	0.176397
邯郸市	2014	2.35807	0.902942	32943	36.8	4496	0.21961
邯郸市	2015	2.40633	0.906838	33450	40.03	4207	0.131314
邯郸市	2016	2.42982	0.940406	35265	40.26	3332	0.132577
邯郸市	2017	2.7634	0.777207	35567	42.0659	3606	0.149497
邯郸市	2018	2.72727	0.743722	36289	45.83	3676.26	0.153678
邯郸市	2019	2.84095	0.687443	36546	45.59	3918.7	0.190849
张家口市	2004	0.976887	0.10848	8889	36.8	1051	0.0300669
张家口市	2005	0.858589	0.0976324	9947	39.08	1057	0.0358837
张家口市	2006	0.805399	0.100344	11580	39.27	2145	0.0445714
张家口市	2007	0.945401	0.0976324	13520	39.85	2193	0.074322
张家口市	2008	1.05693	0.0976324	17134	39.53	2211	0.0902313
张家口市	2009	0.986137	0.100344	18948	43	2227	0.385711
张家口市	2010	1.19695	0.111192	22517	41.21	2280	0.123849
张家口市	2011	1.41459	0.130177	25649	39.69	2296	0.0901476
张家口市	2012	1.46474	0.149161	28139	40.43	2307	0.10567
张家口市	2013	1.57269	0.189841	28201	39.56	2328	0.103227
张家口市	2014	1.60399	0.211754	30540	39.58	2339	0.112686
张家口市	2015	1.63624	0.22673	30840	42.12	2379	0.0865465
张家口市	2016	1.77497	0.219556	33142	44.53	2308	0.153684
张家口市	2017	1.92849	0.159714	32219	46.556	2593	0.145906
张家口市	2018	2.03199	0.174498	34661	51.51	2631.49	0.18583
张家口市	2019	2.01381	0.184499	35025	55.57	2675.67	0.150277
保定市	2004	1.06479	0.913331	10261	34.99	3187	0.00871382
保定市	2005	0.964886	0.903614	10020	32.91	3225	0.0114817
保定市	2006	1.04776	0.791877	11146	33.72	3538	0.010192
保定市	2007	1.18406	0.806452	12703	34.65	3608	0.0452668
保定市	2008	1.28836	0.932763	14518	36.07	3619	0.0571894
保定市	2009	1.35603	0.957054	15770	34.29	3926	0.0520115
保定市	2010	1.46008	0.96677	18451	33.59	3604	0.105877
保定市	2011	1.48047	1.05477	21796	31.36	3681	0.0634924
保定市	2012	1.55285	1.57764	24053	31.12	3879	0.0700062
保定市	2013	1.68102	2.12919	24951	31.54	3752	0.084588
保定市	2014	1.64143	1.99824	26501	34.48	4547	0.074822
保定市	2015	1.56543	2.02132	29067	38.2	4565	0.0742383
保定市	2016	1.87296	1.89556	29992	38.61	4670	0.107712
保定市	2017	2.29755	1.86347	29579.5	41.0887	4795	0.129685
保定市	2018	2.31854	2.57011	31057	46.27	5015.51	0.11996
保定市	2019	2.446	2.72644	31856	53.3	4798.94	0.15052
沧州市	2004	1.18582	0.19213	11659	33.83	2670	0.0255388
沧州市	2005	1.3723	0.185014	16581	34.63	2726	0.0196587
沧州市	2006	1.40392	0.213478	18658	35.1	2786	0.018671
沧州市	2007	1.50302	0.206362	21205	36.82	2788	0.0551528
沧州市	2008	1.80305	0.213478	24665	37.75	2949	0.0530486
沧州市	2009	2.05346	0.206362	25719	39.75	3015	0.0561284
沧州市	2010	2.35213	0.256173	31091	37.91	3170	0.053633
沧州市	2011	1.86969	0.405607	36053	36	3352	0.0438071
沧州市	2012	1.99936	0.419839	38949	36.06	3352	0.0525064
沧州市	2013	2.06879	0.355796	39960	37.34	2991	0.0686595
沧州市	2014	2.07179	0.343926	42676	37.89	3077	0.111554
沧州市	2015	2.22357	0.290631	44819	40.8	3169	0.0555798
沧州市	2016	2.57516	1.55511	47425	41.7	3242	0.122939
沧州市	2017	2.85432	1.39131	48384	43.6483	3395	0.126428
沧州市	2018	2.81769	1.25727	48562	49.52	3545.36	0.156813
沧州市	2019	2.73258	1.12276	47663	51.98	2055	0.137742
秦皇岛市	2004	1.06877	0.611458	16515	48.21	2089	0.0105415
秦皇岛市	2005	1.09781	0.624751	17171	50.8	2137	0.0125828
秦皇岛市	2006	1.06494	0.691214	19745	51.7	2378	0.0134951
秦皇岛市	2007	1.21622	0.544995	23330	49.71	2434	0.0768164
秦皇岛市	2008	1.41991	0.558288	27481	48.19	2472	0.0626613
秦皇岛市	2009	1.26224	0.57158	27110	48.53	2559	0.0744026
秦皇岛市	2010	1.34632	0.651336	31182	46.86	2481	0.0838154
秦皇岛市	2011	1.40379	0.563958	35691	47.72	2601	0.100834
秦皇岛市	2012	1.40157	0.653679	37804	47.33	2626	0.105067
秦皇岛市	2013	1.44867	0.743399	39889	47.03	2650	0.118819
秦皇岛市	2014	1.48228	0.753781	39282	48.01	2722	0.157997
秦皇岛市	2015	1.47352	0.743655	40746	50.2	4355	0.0735339
秦皇岛市	2016	1.61977	0.729172	73755	50.75	6511	0.216044
秦皇岛市	2017	1.94315	0.570238	48356	48.5832	3792	0.202688
秦皇岛市	2018	2.14895	0.630911	52380	54.43	4053.29	0.187324
秦皇岛市	2019	2.06301	0.752371	51334	54.31	3996.97	0.192581
邢台市	2004	1.19681	0.320359	9491	25.22	4271	0.0124611
邢台市	2005	1.18845	0.376422	10041	24.44	4374	0.0135292
邢台市	2006	1.31421	0.376422	11598	25.12	5220	0.0111767
邢台市	2007	1.25258	0.376422	12978	27.06	5761	0.0643616
邢台市	2008	1.32235	0.329741	14315	27.69	5492	0.0638825
邢台市	2009	1.37489	0.296332	15174	28.46	5608	0.0910166
邢台市	2010	1.48574	0.336377	17189	28.74	5566	0.06945
邢台市	2011	1.58386	0.36194	20027	29.16	6173	0.0754204
邢台市	2012	1.66945	0.378026	21361	30.16	7818	0.0770857
邢台市	2013	1.71229	0.386069	21030	31.74	7988	0.0800025
邢台市	2014	1.66375	0.444301	22758	36.04	8167	0.116622
邢台市	2015	1.76092	0.432961	24256	39.41	8209	0.0782838
邢台市	2016	1.94412	0.435856	27038	39.49	8309	0.124024
邢台市	2017	2.20038	0.35816	28499	41.3555	8461	0.118639
邢台市	2018	2.30194	0.355747	29210	46.89	8160.28	0.134855
邢台市	2019	2.1879	0.367731	28707	47.33	5239.55	0.143358
廊坊市	2004	1.15018	0.855499	15566	30.87	1223	0.0311673
廊坊市	2005	1.19418	0.715508	15727	29.69	1257	0.0341905
廊坊市	2006	1.26987	0.715508	18327	29.46	1671	0.031622
廊坊市	2007	1.61045	0.79328	21917	30.17	1582	0.154933
廊坊市	2008	1.78618	1.49323	25757	31.06	1629	0.141437
廊坊市	2009	1.81977	1.50879	27904	34.52	1751	0.179681
廊坊市	2010	2.01536	1.711	31844	34.77	1774	0.174221
廊坊市	2011	2.01792	1.83543	36773	34.85	1781	0.173239
廊坊市	2012	2.38999	2.75315	40598	34.96	1788	0.187747
廊坊市	2013	2.6038	1.9273	46046	37.16	1798	0.162799
廊坊市	2014	2.89303	1.79129	48407	42.5	1822	0.135315
廊坊市	2015	3.22802	1.9016	54460	47.1	1849	0.168182
廊坊市	2016	3.47464	2.02491	58972	48.6	1925	0.282507
廊坊市	2017	4.39572	1.20159	61586	46.0869	1959	0.232002
廊坊市	2018	5.61178	1.32824	64906	57.06	2083.56	0.18018
廊坊市	2019	6.19983	1.52298	65512	60.44	2194.18	0.232406
承德市	2004	1.11187	0.0531	8352	32.09	647	0.0364253
承德市	2005	1.19555	0.0531	10723	30.81	652	0.0311416
承德市	2006	1.23435	0.0556286	12688	29.79	1121	0.0286684
承德市	2007	1.38171	0.0606857	16377	27.1	888	0.127597
承德市	2008	1.61296	0.0606857	21048	24.83	954	0.121157
承德市	2009	1.71803	0.0632143	22198	33.48	660	0.125231
承德市	2010	1.93699	0.0733286	25699	33.28	701	0.116417
承德市	2011	3.20494	0.0859715	31705	30.18	690	0.124072
承德市	2012	3.53409	0.0935572	33791	31.42	702	0.132877
承德市	2013	3.50602	0.148484	33653	32.38	744	0.168384
承德市	2014	3.69517	0.163915	38128	33.2	771	0.124092
承德市	2015	3.6889	0.156509	38505	35.82	792	0.114563
承德市	2016	3.83364	0.147419	40741	37.68	799	0.167409
承德市	2017	4.09321	0.123373	41299	41.8702	817	0.146098
承德市	2018	4.78097	0.123018	41476	45.68	825.656	0.171568
承德市	2019	4.68184	0.170372	41080	46.53	789.332	0.12692
衡水市	2004	1.14834	0.23823	11450	29.17	6460	0.0212324
衡水市	2005	1.24978	0.249575	12344	29.6	6500	0.0183377
衡水市	2006	1.1013	0.249575	12944	30.13	1353	0.0196714
衡水市	2007	1.35812	0.23823	13132	32.93	1366	0.0720651
衡水市	2008	1.33977	0.249575	14843	33.68	1350	0.0772151
衡水市	2009	1.26239	0.249575	15192	30.35	1351	0.0844955
衡水市	2010	1.31459	0.260919	18076	29.63	1368	0.0862216
衡水市	2011	1.56933	0.260269	21334	28.65	1397	0.0721794
衡水市	2012	1.6667	0.271585	23101	29.58	1322	0.0725599
衡水市	2013	1.60761	0.328612	23889	32.1	1339	0.0738717
衡水市	2014	1.65858	0.337493	26022	37.65	1348	0.07168
衡水市	2015	1.75526	0.323653	27543	40	1348	0.0697127
衡水市	2016	1.96074	0.323539	31955	39.96	1491	0.119935
衡水市	2017	2.78804	0.243295	34177	41.3616	1603	0.204709
衡水市	2018	2.67277	0.192373	34898	46.12	1602.89	0.29016
衡水市	2019	2.57352	0.286409	33599	52.9	1614.85	0.370233
太原市	2004	1.03764	4.25014	18804	42.09	1745	0.0243404
太原市	2005	1.26827	4.30738	26107	50.88	1802	0.0239822
太原市	2006	1.43695	4.55066	29504	51.16	1926	0.0285701
太原市	2007	1.6335	4.55264	36377	47.22	2645	0.275773
太原市	2008	2.02578	4.50708	42378	48.09	2670	0.280352
太原市	2009	2.11549	4.49519	44319	54.43	2704	0.240862
太原市	2010	2.30711	4.53827	50225	53.39	2123	0.264418
太原市	2011	2.69209	4.48617	49292	52.74	2207	0.372867
太原市	2012	2.34969	4.34284	54440	53.64	2276	0.413523
太原市	2013	2.12372	5.3318	65746	54.8	3400	0.468193
太原市	2014	2.1542	5.70063	59023	58.47	3500	0.558925
太原市	2015	2.38048	5.90641	63483	61.34	3600	0.468058
太原市	2016	2.56497	5.67773	68234	62.57	3680	0.281489
太原市	2017	3.95194	5.66156	77536	53.2876	3710	0.547862
太原市	2018	3.73347	6.10332	88272	61.9	3729.7	0.644738
太原市	2019	3.6724	5.94533	90698	61.24	3850	0.575934
大同市	2004	1.00483	0.347222	9874	34.25	686	0.0432847
大同市	2005	0.968036	0.361011	11913	40.22	691	0.0273598
大同市	2006	1.01322	0.389325	12970	41.84	13134	0.0290425
大同市	2007	0.978706	0.382247	15581	41.87	12878	0.125477
大同市	2008	1.06228	0.453033	17974	41.74	12968	0.133947
大同市	2009	0.920754	0.403483	18710	47.09	11731	0.117432
大同市	2010	1.01116	0.410561	21369	46.1	9839	0.128637
大同市	2011	1.09472	0.410561	25341	43.76	9704	0.125526
大同市	2012	1.12363	0.438876	27815	43.96	9816	0.1115
大同市	2013	1.12071	0.438876	28707	47.25	9953	0.119605
大同市	2014	1.16682	0.37112	29607	49.83	9614	0.128928
大同市	2015	1.24436	0.380079	30989	52.85	9492	0.0741714
大同市	2016	1.30981	0.379797	30046	57.65	9660	0.0878732
大同市	2017	1.8939	0.369375	32671	50.7906	9675	0.196306
大同市	2018	2.01827	0.278107	36877	58.4	9775.73	0.171821
大同市	2019	2.02255	0.322353	38122	57.4	9779.57	0.171365
阳泉市	2004	1.00855	0.262582	11719	35.62	623	0.0275246
阳泉市	2005	1.06436	0.306346	15380	40.6	666	0.0257177
阳泉市	2006	0.958823	0.306346	18188	38.95	12184	0.0220689
阳泉市	2007	0.984551	0.328228	20839	39.05	12411	0.161066
阳泉市	2008	1.15846	0.284464	23593	39.16	10630	0.175244
阳泉市	2009	1.25736	0.350109	26383	41.18	11101	0.170916
阳泉市	2010	1.32291	0.350109	31898	39.01	11386	0.167452
阳泉市	2011	1.69885	0.371991	38500	38.96	11116	0.142412
阳泉市	2012	2.13444	0.393873	43702	39.59	11092	0.161824
阳泉市	2013	1.83941	0.525164	46001	40.63	11000	0.151093
阳泉市	2014	1.77939	0.756018	44382	43.58	10885	0.135076
阳泉市	2015	1.91535	0.742232	42688	48.5	10901	0.0976161
阳泉市	2016	1.92605	0.705252	44461	50.31	10188	0.0854763
阳泉市	2017	2.77182	0.777144	47789.9	46.51	9250	0.135234
阳泉市	2018	3.40167	0.513051	51976	51.52	9267.37	0.0891243
阳泉市	2019	3.10566	0.701031	50775	52.83	8887.28	0.103574
长治市	2004	1.19554	0.187104	9928	27.34	1980	0.0322475
长治市	2005	1.30768	0.187104	12363	34.91	2027	0.0314987
长治市	2006	1.4487	0.194301	14197	35.02	2117	0.0302998
长治市	2007	1.58212	0.201497	16887	34.56	2233	0.167664
长治市	2008	1.85961	0.201497	20821	31.77	2234	0.144136
长治市	2009	1.76764	0.208693	23558	32.68	2278	0.153568
长治市	2010	1.60478	0.215889	27642	30.24	9297	0.159134
长治市	2011	1.88011	0.215889	36425	28.09	9440	0.189225
长治市	2012	1.67154	0.244675	39523	28.62	9906	0.193849
长治市	2013	1.50788	0.27346	39343	30.74	9835	0.211664
长治市	2014	1.46213	0.293394	39196	37.29	9822	0.110687
长治市	2015	1.33565	0.294905	35029	44.01	9701	0.135476
长治市	2016	1.43147	0.298791	37063	44.25	9982	0.277896
长治市	2017	2.30014	0.284343	42887	37.7569	9853	0.129588
长治市	2018	2.43895	0.353852	47540	41.93	9905.51	0.119273
长治市	2019	2.36148	0.493228	47219	43.56	10123.4	0.102689
晋城市	2004	1.09098	0.126449	11148	30.68	9622	0.0316141
晋城市	2005	1.34054	0.126449	14356	31.18	9640	0.0284811
晋城市	2006	1.21647	0.148604	16489	30.95	2199	0.0347961
晋城市	2007	1.23406	0.148604	18773	31.62	2177	0.169422
晋城市	2008	1.24992	0.148604	23680	32.23	2245	0.170885
晋城市	2009	1.32917	0.159151	27108	32.54	2245	0.168814
晋城市	2010	1.53158	0.159151	32337	32.19	2245	0.174774
晋城市	2011	1.71268	0.169761	39205	30.21	2746	0.168418
晋城市	2012	1.72942	0.190981	44257	31.23	2763	0.189423
晋城市	2013	1.49619	0.233422	47119	33.35	2875	0.209494
晋城市	2014	1.46139	0.269284	44943	37.02	3092	0.190863
晋城市	2015	1.45907	0.251883	44994	39.87	3158	0.215604
晋城市	2016	1.47858	0.243501	45271	42.37	3224	0.0924772
晋城市	2017	2.38648	0.243395	49487	36.0912	3448	0.115559
晋城市	2018	2.72069	0.237454	57819	43.26	3482.52	0.11138
晋城市	2019	2.676	0.313846	57714	42.18	3526.19	0.209734
朔州市	2004	1.07564	0.0470677	9738	30.07	1420	0.0132219
朔州市	2005	1.26926	0.0564812	12094	31.37	1605	0.0147536
朔州市	2006	1.4329	0.0564812	15481	29.05	1884	0.0126855
朔州市	2007	1.78559	0.0361468	21828	30.56	1922	0.104036
朔州市	2008	2.06576	0.0361468	27458	31.55	1915	0.123286
朔州市	2009	2.71662	0.0722935	36452	42.4	1946	0.110617
朔州市	2010	2.9048	0.0903669	41107	37.39	2041	0.10914
朔州市	2011	3.26194	0.0936856	49692	36.37	2453	0.114383
朔州市	2012	3.81676	0.103054	58205	35.76	2476	0.123372
朔州市	2013	3.25809	0.140528	58989	37.95	2478	0.136915
朔州市	2014	3.08562	0.15327	57368	39.79	2490	0.0967202
朔州市	2015	2.68798	0.157271	51256	48.75	2490	0.102616
朔州市	2016	3.37941	0.157835	52010	50.82	2449	0.0505956
朔州市	2017	5.20687	0.149176	55316	49.1229	2464	0.0829097
朔州市	2018	5.31465	0.1296	59914	56.33	2466.48	0.0527011
朔州市	2019	5.38308	0.110024	59552	54.46	2501.14	0.061968
忻州市	2004	1.08338	0.084	4327	39.09	1093	0.0365609
忻州市	2005	1.14121	0.088	5519	47.2	1148	0.0300891
忻州市	2006	1.29541	0.0875901	6506	43.81	1211	0.0314212
忻州市	2007	1.7042	0.0915714	8209	38.36	1237	0.181006
忻州市	2008	1.72758	0.0796273	10101	38.13	1205	0.218764
忻州市	2009	1.34465	0.0875901	11292	47.49	1210	0.199452
忻州市	2010	1.64674	0.0875901	14193	44.15	1475	0.204066
忻州市	2011	1.68983	0.0875901	18019	38.54	1492	0.208044
忻州市	2012	1.68002	0.0955528	20081	39.17	1531	0.264774
忻州市	2013	1.64713	0.107497	21052	40.31	1547	0.271271
忻州市	2014	1.57178	0.110647	21796	42.91	1591	0.12651
忻州市	2015	1.56993	0.109295	21731	45.95	1638	0.135166
忻州市	2016	1.66225	0.105558	22747	47.05	1639	0.148268
忻州市	2017	3.20278	0.0986005	27665	38.2972	1653	0.214079
忻州市	2018	3.49172	0.0970499	31209	44.73	1693.99	0.139223
忻州市	2019	3.65394	0.124703	31573	47.93	1778.69	0.134511
晋中市	2004	1.13272	0.280419	8300	31.46	3205	0.0137842
晋中市	2005	1.34575	0.286515	10772	36.44	2262	0.0160717
晋中市	2006	1.377	0.280419	12491	36.43	2398	0.0128864
晋中市	2007	1.47875	0.292612	15157	36.38	7326	0.124756
晋中市	2008	1.71211	0.292612	18219	34.52	7472	0.133302
晋中市	2009	1.73598	0.609607	20335	38.93	7596	0.133399
晋中市	2010	1.90359	0.34163	24275	36.74	7596	0.132476
晋中市	2011	2.07546	0.34163	27300	36.88	8596	0.13411
晋中市	2012	1.63494	0.250122	30093	36.93	8818	0.142495
晋中市	2013	1.55877	0.286725	30977	38.15	8979	0.169111
晋中市	2014	1.49826	0.270559	31434	42.63	6995	0.184154
晋中市	2015	1.35864	0.31796	31434	46.09	6953	0.181968
晋中市	2016	1.50775	0.30911	32646	47.12	6694	0.138704
晋中市	2017	2.26269	0.275256	38274	39.9564	1247	0.19121
晋中市	2018	2.56728	0.286852	42910	44.6	1250.67	0.157992
晋中市	2019	2.85979	0.248353	43125	47.28	2705.06	0.186863
吕梁市	2004	0.939527	0.0474046	5147	28.11	7948	0.0402594
吕梁市	2005	1.5467	0.0521451	8800	28.62	8227	0.0274298
吕梁市	2006	1.97957	0.0521451	11453	27.72	8506	0.0245963
吕梁市	2007	2.23419	0.0564945	14241	26.22	8785	0.066972
吕梁市	2008	2.5086	0.0564945	17553	24.97	9036	0.0908132
吕梁市	2009	2.0417	0.0659134	16903	30.14	9143	0.102525
吕梁市	2010	2.64636	0.0659134	23267	25.64	9235	0.137865
吕梁市	2011	3.15393	0.108291	30224	22.03	10717	0.125249
吕梁市	2012	3.61752	0.0612082	32709	22.3	10717	0.151981
吕梁市	2013	3.25262	0.0659165	31183	24.13	10717	0.210654
吕梁市	2014	2.8997	0.0634211	28960	31.59	10757	0.143869
吕梁市	2015	2.32292	0.0532511	25003	37.43	5378	0.111822
吕梁市	2016	2.41894	0.0462357	25896	38.82	5408	0.167245
吕梁市	2017	3.62526	0.045247	33886	30.1446	5506	0.187381
吕梁市	2018	3.84637	0.0912943	36585	34.42	5557.77	0.124204
吕梁市	2019	4.05832	0.119685	38890	35.65	5603.59	0.141164
临汾市	2004	1.18386	0.241677	9221	25.8	9899	0.0195246
临汾市	2005	1.53164	0.22688	12741	29.7	10806	0.0151196
临汾市	2006	1.66393	0.197287	14242	30.06	13797	0.016374
临汾市	2007	1.80178	0.187423	15821	29.47	11471	0.113055
临汾市	2008	1.98645	0.177559	18031	29.56	11471	0.0981936
临汾市	2009	1.70929	0.15783	18215	35.38	10037	0.0992612
临汾市	2010	1.89734	0.167694	20851	34.18	10098	0.116846
临汾市	2011	2.02837	0.167694	26220	30.38	10158	0.101703
临汾市	2012	1.5082	0.167694	28031	31.22	7717	0.119419
临汾市	2013	1.41458	0.172626	28663	33.01	8063	0.13823
临汾市	2014	1.36054	0.202219	27557	37.84	9667	0.114751
临汾市	2015	1.30784	0.189051	26239	43.64	10283	0.077581
临汾市	2016	1.32986	0.188656	27102	45.48	10592	0.0777148
临汾市	2017	1.9689	0.171147	29539	42.6483	10283	0.135837
临汾市	2018	2.55229	0.168483	32066	47.6	10283.3	0.077706
临汾市	2019	2.46457	0.205623	32250	49.6	10283.3	0.0566345
运城市	2004	1.13205	0.286451	7461	26.16	8025	0.0139839
运城市	2005	1.42261	0.365225	9473	32.25	8086	0.0119151
运城市	2006	1.29738	0.358064	11001	32.93	8989	0.0148671
运城市	2007	1.39817	0.264967	12313	34.3	9171	0.080645
运城市	2008	1.44981	0.260912	12313	34.88	9171	0.093442
运城市	2009	1.13892	0.204499	14306	39.76	9404	0.0856422
运城市	2010	1.09177	0.204499	16175	38.75	9663	0.130536
运城市	2011	1.63001	0.211551	19733	35.22	9663	0.117887
运城市	2012	1.5346	0.211551	20628	37.37	9663	0.112619
运城市	2013	1.59288	0.253861	21841	38.47	7679	0.159607
运城市	2014	1.55711	0.266624	22940	42.25	7679	0.15234
运城市	2015	1.65444	0.290559	22304	46.08	7679	0.131642
运城市	2016	1.53087	0.234577	23106	47.2	4837	0.109421
运城市	2017	2.19778	0.230064	25115	42.1466	4837	0.155864
运城市	2018	2.53905	0.231122	28229	48.22	6411.7	0.121665
运城市	2019	2.4914	0.218924	29126	49.54	6411.7	0.0984389
呼伦贝尔市	2004	1.15541	0.0122357	9598	44.68	1913	0.0368617
呼伦贝尔市	2005	1.13151	0.0122357	11919	42.33	1900	0.0282952
呼伦贝尔市	2006	1.49381	0.0122357	14628	43.17	1799	0.0301726
呼伦贝尔市	2007	1.73133	0.0134199	18687	42.46	1950	0.160997
呼伦贝尔市	2008	2.00886	0.0138146	23413	40.81	2022	0.204375
呼伦贝尔市	2009	2.22425	0.0130251	28882	41.12	2212	0.200586
呼伦贝尔市	2010	2.44342	0.0130251	34452	38.31	1374	0.170212
呼伦贝尔市	2011	2.99736	0.0142093	45038	36.74	1383	0.176974
呼伦贝尔市	2012	3.45642	0.0173669	52649	34.95	1480	0.180009
呼伦贝尔市	2013	2.03302	0.0201759	56544	33.92	1203	0.219069
呼伦贝尔市	2014	2.30047	0.0233407	60152	37.21	1206	0.232413
呼伦贝尔市	2015	2.26882	0.022866	63131	39.06	1272	0.249001
呼伦贝尔市	2016	2.32114	0.0300819	64140	40	1394	0.21179
呼伦贝尔市	2017	2.47823	0.0234752	56834.5	49.9696	1387	0.131334
呼伦贝尔市	2018	3.72188	0.0217303	49529	49.27	1390.48	0.122532
呼伦贝尔市	2019	3.66712	0.0232481	47116	48.73	1334.72	0.113965
通辽市	2004	1.03858	0.0566667	8940	37.18	7727	0.0467012
通辽市	2005	1.11692	0.0583333	10616	38.95	8369	0.0398095
通辽市	2006	1.27369	0.0487108	13354	37.61	8006	0.0451059
通辽市	2007	1.67978	0.0470312	18952	32.3	8536	0.130498
通辽市	2008	1.69913	0.0554296	25402	30.92	8857	0.140344
通辽市	2009	1.5263	0.0537499	31147	28.93	6884	0.138684
通辽市	2010	2.0873	0.0537499	38157	26.23	7652	0.147966
通辽市	2011	2.40629	0.0503905	46167	24.4	6635	0.118952
通辽市	2012	2.02034	0.0621483	53976	23.09	6635	0.0897952
通辽市	2013	2.14933	0.0705467	55508	27.89	6507	0.118981
通辽市	2014	2.22332	0.0638564	60380	29.35	5971	0.0853403
通辽市	2015	2.57915	0.0728505	60123	35.1	5963	0.10494
通辽市	2016	2.79216	0.0694096	62424	36.37	5976	0.0677138
通辽市	2017	2.47977	0.0665795	51998.5	51.5489	5976	0.08144
通辽市	2018	2.13309	0.0624361	41573	52.7	6082.24	0.0879917
通辽市	2019	2.02243	0.0749971	40410	46.94	6088.85	0.100781
乌兰察布	2004	1.16626	0.0568891	6760	26.75	2869	0.0452569
乌兰察布	2005	1.42041	0.0587242	8480	32.75	2869	0.0385741
乌兰察布	2006	1.51766	0.0587242	10268	33.83	2869	0.0330425
乌兰察布	2007	2.07453	0.0495486	16071	34.3	2869	0.119273
乌兰察布	2008	2.33814	0.0495486	20358	32.41	2977	0.152984
乌兰察布	2009	2.65681	0.0495486	23489	32.02	2592	0.110778
乌兰察布	2010	2.5443	0.0532188	26604	31.17	795	0.098467
乌兰察布	2011	2.27957	0.0513837	32246	30.02	6518	0.110153
乌兰察布	2012	2.61337	0.0605571	36721	29.46	6691	0.072417
乌兰察布	2013	2.75397	0.0697248	29463	31.55	5550	0.122692
乌兰察布	2014	2.85139	0.0484771	41138	35.15	5683	0.162179
乌兰察布	2015	2.89075	0.0504404	43221	36.94	5322	0.0883369
乌兰察布	2016	3.7656	0.0437615	44517	37.35	4965	0.0699245
乌兰察布	2017	3.35344	0.0450092	40467.5	46.4274	4270	0.0889873
乌兰察布	2018	3.48462	0.0458716	36418	43.15	4422.86	0.0962696
乌兰察布	2019	3.8386	0.0500771	38622	44.99	4399.63	0.073354
鄂尔多斯市	2004	1.34881	0.0195961	26000	30.05	481	0.0303385
鄂尔多斯市	2005	1.68093	0.0207488	40167	40.64	369	0.0264785
鄂尔多斯市	2006	2.09863	0.0207488	53163	39.66	552	0.0214749
鄂尔多斯市	2007	2.62456	0.0242069	75164	40.65	601	0.0984877
鄂尔多斯市	2008	3.48278	0.0242069	102128	38.3	1144	0.1025
鄂尔多斯市	2009	4.9427	0.0230542	134400	38.87	3451	0.150884
鄂尔多斯市	2010	4.42608	0.0219015	175125	38.63	3671	0.108016
鄂尔多斯市	2011	5.45782	0.0230542	163014	37.34	3843	0.220302
鄂尔多斯市	2012	5.85619	0.0219015	182680	37.01	3487	0.131065
鄂尔多斯市	2013	6.20286	0.0461084	256877	37.64	3104	0.100819
鄂尔多斯市	2014	6.39466	0.051434	200152	39.44	2473	0.0578993
鄂尔多斯市	2015	6.4277	0.045924	207163	40.87	2624	0.0878085
鄂尔多斯市	2016	7.98139	0.0413247	215488	41.85	2712	0.0467232
鄂尔多斯市	2017	8.58755	0.043561	198487	45.0588	2488	0.0583635
鄂尔多斯市	2018	9.55076	0.0459934	181486	44.55	2640.51	0.0927134
鄂尔多斯市	2019	8.64164	0.0687484	173069	38.53	2730.62	0.136602
巴彦淖尔市	2004	1.21342	0.0372596	10774	33.05	460	0.0872345
巴彦淖尔市	2005	1.19247	0.0372596	12560	31.66	465	0.0784687
巴彦淖尔市	2006	1.35197	0.0372596	16045	29.07	470	0.0715949
巴彦淖尔市	2007	1.66591	0.0372596	20423	27.49	475	0.0890616
巴彦淖尔市	2008	1.83554	0.0310496	25237	26.6	454	0.0985287
巴彦淖尔市	2009	2.0239	0.0341546	29384	25.62	457	0.0730781
巴彦淖尔市	2010	2.26938	0.0310496	35463	23.97	558	0.141283
巴彦淖尔市	2011	2.4338	0.0341546	43118	23.11	517	0.0899158
巴彦淖尔市	2012	3.4656	0.0465744	48812	22.54	519	0.0874922
巴彦淖尔市	2013	3.80189	0.0372596	45622	24.33	548	0.111452
巴彦淖尔市	2014	3.82471	0.0383789	51872	25.45	610	0.069375
巴彦淖尔市	2015	4.12777	0.0438312	53000	30.56	5093	0.0777751
巴彦淖尔市	2016	4.19674	0.043454	54480	32.1	4842	0.0937862
巴彦淖尔市	2017	4.23774	0.0456248	51336.5	40.0592	4791	0.0891751
巴彦淖尔市	2018	4.17381	0.0504298	48193	39.27	4763.38	0.0844268
巴彦淖尔市	2019	4.3442	0.0454252	51722	44.52	4941	0.0723314
呼和浩特市	2004	1.13821	0.725732	26321	48.49	534	0.0130639
呼和浩特市	2005	1.50017	0.731537	29049	56.31	534	0.00926496
呼和浩特市	2006	1.87371	0.71412	34710	55.29	630	0.00796592
呼和浩特市	2007	2.48854	0.71412	42016	56.62	649	0.0649331
呼和浩特市	2008	2.34357	0.748955	49606	56.16	663	0.112567
呼和浩特市	2009	2.94057	0.789596	61108	59.16	5122	0.107026
呼和浩特市	2010	3.29963	0.795402	66929	58.71	5936	0.103199
呼和浩特市	2011	3.467	0.813614	75266	58.69	6084	0.102358
呼和浩特市	2012	3.89849	0.847992	84534	58.68	7131	0.0934613
呼和浩特市	2013	3.71131	1.18119	115829	63.05	5895	0.115448
呼和浩特市	2014	3.16958	1.22192	95961	66.36	7115	0.12441
呼和浩特市	2015	3.57767	1.22792	101492	67.86	7096	0.0825233
呼和浩特市	2016	3.77637	1.22117	103235	68.56	7339	0.134762
呼和浩特市	2017	3.91314	1.21647	98132	71.233	7734	0.120475
呼和浩特市	2018	3.97269	1.10817	93029	68.67	8922.76	0.115023
呼和浩特市	2019	3.62708	1.61457	89138	66.41	8338.68	0.257499
包头市	2004	1.30519	0.208874	28998	37.95	553	0.0311675
包头市	2005	1.85808	0.19807	40457	43.32	554	0.0217745
包头市	2006	2.21832	0.201671	47902	42.32	630	0.0211955
包头市	2007	2.86731	0.244886	59719	44.99	649	0.130794
包头市	2008	3.76559	0.259291	70004	40	656	0.118721
包头市	2009	4.76168	0.259291	84979	43.26	1954	0.125558
包头市	2010	5.14159	0.234082	94269	43.19	1977	0.11877
包头市	2011	3.93698	0.252089	112372	41.93	1977	0.121634
包头市	2012	4.9391	0.172861	125709	42.07	1989	0.112039
包头市	2013	4.8407	0.237684	155690	45.52	2000	0.128215
包头市	2014	5.10217	0.284032	130676	47.94	2079	0.141759
包头市	2015	5.22927	0.316551	132253	48.91	2130	0.145003
包头市	2016	6.43729	0.247299	136021	50.43	2140	0.150904
包头市	2017	5.85587	0.244022	119200	61.5725	2157	0.114857
包头市	2018	5.52032	0.197169	102379	55.82	2187.8	0.163521
包头市	2019	5.12483	0.277118	93835	57.17	2197.18	0.157723
乌海市	2004	1.06073	0.342075	20081	24.96	251	0.0286757
乌海市	2005	1.28839	0.342075	27187	35.37	256	0.0209387
乌海市	2006	1.8321	0.4561	32598	35.06	262	0.0198823
乌海市	2007	2.0475	0.4561	40135	33.25	248	0.150547
乌海市	2008	2.33412	0.513113	50036	32.68	251	0.137859
乌海市	2009	2.76654	0.627138	64147	30.16	293	0.190548
乌海市	2010	2.07618	0.513113	76653	27.33	313	0.198607
乌海市	2011	2.12034	0.4561	89521	26.27	309	0.229863
乌海市	2012	2.85441	0.627138	103242	25.69	311	0.189843
乌海市	2013	3.49526	0.855188	103660	33.15	364	0.424816
乌海市	2014	3.64684	0.806157	108556	35.81	1995	0.249227
乌海市	2015	3.45091	0.838826	100871	42.15	8347	0.348712
乌海市	2016	4.74229	0.796285	102725	42.57	8188	0.313355
乌海市	2017	4.73294	0.877423	95383	46.4025	8188	0.14054
乌海市	2018	4.80108	0.787913	88041	37.05	8386.18	0.203575
乌海市	2019	5.10294	0.769669	97565	36.88	8340.03	0.161307
赤峰市	2004	1.16373	0.0399907	7130	32.84	1082	0.0320524
赤峰市	2005	1.14904	0.0399907	7894	36.6	1082	0.0329149
赤峰市	2006	1.26917	0.0355473	9751	35.71	1499	0.02792
赤峰市	2007	1.58894	0.0375032	13471	31.96	1521	0.083879
赤峰市	2008	1.94896	0.0408123	17242	31.05	1504	0.0754526
赤峰市	2009	2.11596	0.0411015	21037	34.24	1502	0.0760772
赤峰市	2010	2.37346	0.0444341	25059	32.43	1593	0.0733915
赤峰市	2011	2.56447	0.0499883	31121	30.72	1526	0.0589152
赤峰市	2012	3.27356	0.0533209	36360	29.5	1589	0.0740305
赤峰市	2013	3.14696	0.0555426	36340	33.43	1692	0.0767842
赤峰市	2014	3.32607	0.0528877	41309	36.23	1788	0.0990457
赤峰市	2015	3.39621	0.0560092	43269	37.7	1754	0.0770332
赤峰市	2016	3.60474	0.0546428	44936	37.88	1784	0.0720227
赤峰市	2017	3.61115	0.0536433	40377.5	50.3494	1728	0.0700636
赤峰市	2018	3.43737	0.0462781	35819	49.5	1719.64	0.123142
赤峰市	2019	3.55764	0.0495662	39488	51.31	1737.14	0.103612
沈阳市	2004	1.23832	2.76579	27487	44.69	1409	0.0475828
沈阳市	2005	1.27402	2.52696	29935	50.45	1419	0.0516234
沈阳市	2006	1.43264	2.85824	35940	49.42	5321	0.0477728
沈阳市	2007	1.72357	2.92758	45582	46.54	2999	0.30857
沈阳市	2008	2.03073	3.08937	54248	45.14	3108	0.325157
沈阳市	2009	2.29968	3.09707	54654	45.31	3144	0.319296
沈阳市	2010	2.65155	3.53621	62357	44.94	3177	0.305911
沈阳市	2011	2.77281	4.14484	72648	44.12	2076	0.343717
沈阳市	2012	3.02027	4.58398	80480	43.99	1828	0.373198
沈阳市	2013	2.95259	4.91525	98467	43.84	1832	0.388249
沈阳市	2014	2.96553	4.96462	85816	45.53	1593	0.374222
沈阳市	2015	3.2143	4.84876	87734	47.53	1484	0.322514
沈阳市	2016	3.89569	3.99347	66893	56.41	1501	0.403646
沈阳市	2017	4.38741	3.48795	69754	53.0942	3180	0.279477
沈阳市	2018	4.81624	3.27737	75766	58.1	3510.06	0.287849
沈阳市	2019	4.95399	3.61353	77777	61.94	3535.09	0.307594
大连市	2004	1.09507	0.994115	34975	42.07	1152	0.0226174
大连市	2005	1.10449	0.95435	38196	45.2	1095	0.0269348
大连市	2006	1.26984	0.938444	42579	44.05	3169	0.0205513
大连市	2007	1.57111	0.946397	51630	42.99	2676	0.379927
大连市	2008	1.92499	1.02593	63198	40.83	2393	0.379216
大连市	2009	2.08105	1.15317	70781	43.89	2478	0.425768
大连市	2010	2.42463	1.26451	77704	42.43	2450	0.515752
大连市	2011	2.04043	1.59854	91295	41.47	2466	0.539217
大连市	2012	2.4214	1.74169	102922	41.65	2518	0.561019
大连市	2013	2.49946	1.61444	129455	42.89	2762	0.604599
大连市	2014	2.65045	1.69047	109939	45.93	2797	0.562019
大连市	2015	2.90994	1.65922	110682	50.83	2820	0.236469
大连市	2016	3.51292	1.53603	97470	51.36	2329	0.301725
大连市	2017	3.5826	1.55782	100033	48.9037	2633	0.174339
大连市	2018	4.04161	1.37806	109550	51.96	2500.53	0.465049
大连市	2019	3.9218	1.43999	99996	53.46	2898.82	0.392668
鞍山市	2004	1.19697	0.77821	28900	35.78	2341	0.0139563
鞍山市	2005	1.1345	0.843061	29338	39.48	2342	0.0126226
鞍山市	2006	1.21864	0.77821	32644	39.83	6057	0.0119629
鞍山市	2007	1.34965	0.77821	38387	39.65	2400	0.109643
鞍山市	2008	1.52703	0.810636	45830	40.8	2482	0.0941311
鞍山市	2009	1.52802	0.864678	49301	42.44	2478	0.0916627
鞍山市	2010	1.76829	1.12408	58426	41.3	2495	0.0923054
鞍山市	2011	1.63099	1.46948	68224	41.99	2532	0.0835889
鞍山市	2012	1.7219	2.16099	69211	41.65	2548	0.101049
鞍山市	2013	1.83569	2.44192	74950	41.91	2593	0.0969826
鞍山市	2014	1.7693	2.82723	66860	43.94	2581	0.188072
鞍山市	2015	1.88237	1.96704	64710	46.97	2534	0.0985881
鞍山市	2016	1.86927	1.73182	40532	57.32	2191	0.0791602
鞍山市	2017	2.55433	1.36619	44790	50.1862	2247	0.0958589
鞍山市	2018	2.86671	0.993415	46956.5	53.19	2271.1	0.0531107
鞍山市	2019	2.95036	0.528662	49123	51.27	2289.64	0.0708138
抚顺市	2004	0.962673	0.390348	16637	32.44	1977	0.0372798
抚顺市	2005	0.804434	0.408091	17372	38.32	1971	0.0409747
抚顺市	2006	0.804199	0.416962	20426	37.55	2469	0.0437287
抚顺市	2007	0.860774	0.434705	24451	37.37	2454	0.110829
抚顺市	2008	0.986564	0.425834	29645	36.56	2453	0.1206
抚顺市	2009	1.08586	0.434705	31343	37.21	2418	0.108769
抚顺市	2010	1.38924	0.46132	41810	35.18	2418	0.128994
抚顺市	2011	1.60055	0.470192	52245	33.18	2148	0.142343
抚顺市	2012	1.74686	0.496806	58512	33.53	2137	0.206112
抚顺市	2013	1.98366	0.496806	61488	33.65	2123	0.200605
抚顺市	2014	2.03133	0.478886	61183	38.41	2114	0.210288
抚顺市	2015	2.2067	0.44819	58597	43.07	2069	0.123923
抚顺市	2016	2.89038	0.392388	41741	42.88	2159	0.0493832
抚顺市	2017	2.79231	0.318339	45934	37.2256	2159	0.0264659
抚顺市	2018	3.13256	0.251353	50951	39.94	1868.6	0.0368795
抚顺市	2019	2.58695	0.290125	41382	44.01	1904.47	0.0344392
本溪市	2004	0.835772	0.261562	18752	34.53	635	0.032663
本溪市	2005	0.935479	0.237784	21922	34.39	634	0.0321594
本溪市	2006	1.04253	0.237784	25619	33.25	1221	0.0319476
本溪市	2007	1.30308	0.237784	31066	32.19	1321	0.126371
本溪市	2008	1.30248	0.237784	39199	30.94	1211	0.132109
本溪市	2009	1.32908	0.225895	44251	34.91	1139	0.136535
本溪市	2010	1.86832	0.273451	50612	32.66	898	0.132653
本溪市	2011	1.7285	0.273451	60552	32.02	911	0.20635
本溪市	2012	1.88685	0.404233	64459	33.94	623	0.214194
本溪市	2013	2.11418	0.618238	78530	35.1	626	0.241526
本溪市	2014	2.11359	0.41957	67879	39.77	626	0.257811
本溪市	2015	2.42802	0.341814	67656	42.81	602	0.105375
本溪市	2016	2.42111	0.296992	44745	47.7	602	0.077213
本溪市	2017	2.68018	0.259567	46050	47.0279	564	0.0634796
本溪市	2018	2.86597	0.225576	48920	48.46	567.194	0.0328033
本溪市	2019	2.68386	0.16116	46673	45.59	536.561	0.0287068
丹东市	2004	1.07292	0.272788	12050	44.49	904	0.0838193
丹东市	2005	1.16167	0.252828	13502	42.69	903	0.0917517
丹东市	2006	1.11435	0.272788	15893	41.04	5063	0.0806056
丹东市	2007	1.28842	0.279441	19119	40.59	2857	0.132666
丹东市	2008	1.42965	0.286094	23223	39.2	2890	0.120349
丹东市	2009	1.40916	0.479569	25034	37.48	2963	0.117642
丹东市	2010	2.43094	0.470896	29893	35.07	2967	0.11892
丹东市	2011	1.85146	0.59516	36841	35.04	2861	0.13626
丹东市	2012	1.9944	0.765206	42171	36.13	2815	0.138077
丹东市	2013	2.26957	0.856769	46137	37.22	2878	0.195016
丹东市	2014	2.30013	0.657554	42291	40.93	2861	0.16503
丹东市	2015	2.46802	0.605559	40850	43.18	3237	0.148441
丹东市	2016	2.49592	0.548473	31223	52.22	2916	0.147504
丹东市	2017	3.06293	0.542708	32819	51.3726	1062	0.117865
丹东市	2018	3.41873	0.367757	34193	52.75	1076.19	0.117932
丹东市	2019	3.16121	0.156638	32256	56.09	1044.62	0.0504427
锦州市	2004	1.19562	0.601883	11153	35.84	1995	0.0482921
锦州市	2005	1.12757	0.621299	12397	40.27	1995	0.0479394
锦州市	2006	1.07918	0.731876	14906	39.82	2078	0.0430857
锦州市	2007	1.08728	0.751657	17817	37.83	2171	0.10002
锦州市	2008	1.28286	0.751657	22287	38.16	2195	0.127816
锦州市	2009	1.28528	0.778485	23447	35.58	2220	0.144989
锦州市	2010	1.43935	0.788596	29264	35.8	2244	0.134961
锦州市	2011	1.46792	0.839147	35784	34.88	2239	0.119498
锦州市	2012	1.52437	0.849257	40002	35.1	2268	0.197061
锦州市	2013	1.66182	0.846024	43952	36.14	2195	0.190776
锦州市	2014	1.74005	0.872897	44264	38.82	2209	0.188805
锦州市	2015	1.7505	1.03912	43207	41.23	2163	0.066502
锦州市	2016	1.70659	1.05036	33692	45.89	2163	0.0892997
锦州市	2017	2.02549	0.590963	35254	44.135	2222	0.2218
锦州市	2018	2.26378	0.453324	39211	49.93	2222.48	0.119221
锦州市	2019	2.07139	0.447253	35431	55.5	2133.03	0.46027
营口市	2004	1.25274	0.499815	13867	35	1217	0.0238745
营口市	2005	1.18859	0.481303	16487	37.82	1230	0.0201534
营口市	2006	1.34095	0.481303	19810	35.6	4892	0.0190052
营口市	2007	1.68832	0.499815	24597	34.76	4919	0.051008
营口市	2008	1.99703	0.536838	30177	33.77	4807	0.0994928
营口市	2009	2.40569	0.536838	34104	35.65	4822	0.188484
营口市	2010	2.81196	0.572301	41452	36.96	5193	0.200758
营口市	2011	2.85244	0.610454	50220	37.57	5280	0.244657
营口市	2012	3.32852	0.553224	56583	39	5359	0.254051
营口市	2013	3.72637	0.648607	64941	40.04	5459	0.250457
营口市	2014	3.97197	0.631438	63234	42.6	5459	0.0691814
营口市	2015	4.23594	0.677032	61925	44.63	5149	0.0560859
营口市	2016	3.96812	0.647463	47358	49.63	1675	0.0320606
营口市	2017	4.17983	0.571956	52092	45.9271	1576	0.0383156
营口市	2018	4.69833	0.483579	55295	48	1658.71	0.0311943
营口市	2019	4.81529	0.412935	54545	46.59	1680.07	0.082387
阜新市	2004	1.07293	0.260744	6590	37.1	1749	0.0447588
阜新市	2005	1.02129	0.260744	7398	40.83	1743	0.0330308
阜新市	2006	1.06723	0.241429	8227	41.4	1768	0.0323376
阜新市	2007	1.16781	0.241429	10025	39.56	1746	0.0740018
阜新市	2008	1.32106	0.280058	12134	37.71	1741	0.111153
阜新市	2009	1.39397	0.251086	14967	36.67	1741	0.071084
阜新市	2010	1.72197	0.251086	20819	33.72	1741	0.0563788
阜新市	2011	1.60314	0.269257	26480	32.64	1747	0.183151
阜新市	2012	1.72526	0.280058	31049	31.92	1743	0.21371
阜新市	2013	2.00388	0.299372	32205	31.98	1747	0.206576
阜新市	2014	2.10303	0.314727	33882	35.6	1747	0.0714665
阜新市	2015	2.32394	0.259198	29491	39.28	1741	0.0755227
阜新市	2016	3.41104	0.224529	22956	49.19	1723	0.0754258
阜新市	2017	2.87954	0.215258	23105	46.9943	1694	0.0685896
阜新市	2018	3.15294	0.234476	25340	51.05	1695.09	0.0450009
阜新市	2019	3.60157	0.214002	27945	51.71	1695.09	0.0552254
辽阳市	2004	0.977217	0.590344	15902	37.62	1248	0.0311015
辽阳市	2005	0.949125	0.590344	18135	30.92	1247	0.0302974
辽阳市	2006	0.949487	0.548176	21562	30.73	1284	0.0244254
辽阳市	2007	1.03813	0.590344	25564	29.8	1308	0.0967476
辽阳市	2008	1.0995	0.56926	30897	30.32	1316	0.120859
辽阳市	2009	1.19568	0.527872	33151	30.4	1333	0.205011
辽阳市	2010	1.48718	0.506757	39686	30.52	1253	0.198863
辽阳市	2011	1.31415	0.52367	48594	30.5	1242	0.208166
辽阳市	2012	1.42427	0.717905	53877	30.5	1083	0.202401
辽阳市	2013	1.56348	0.633446	59999	30.8	1104	0.190076
辽阳市	2014	1.57835	0.615709	54800	35.35	1098	0.213618
辽阳市	2015	1.80734	0.605054	55674	37.67	1075	0.0885394
辽阳市	2016	1.54292	0.472222	35476	49.02	1078	0.0923911
辽阳市	2017	1.81496	0.39411	41449	37.2957	1090	0.0649233
辽阳市	2018	2.05436	0.404553	47422	40.6	1048.9	0.064641
辽阳市	2019	1.98387	0.210735	45498	42.94	1056.73	0.0698436
铁岭市	2004	0.998707	0.339297	7204	31.84	702	0.072666
铁岭市	2005	1.04967	0.392912	8764	33.09	601	0.0717933
铁岭市	2006	1.12027	0.385208	10672	32.46	4262	0.0644888
铁岭市	2007	1.20704	0.377504	13249	29.77	2216	0.153008
铁岭市	2008	1.59996	0.392912	17543	27.07	2225	0.199486
铁岭市	2009	1.83154	0.385208	19795	27.95	2221	0.194599
铁岭市	2010	2.1071	0.377504	26556	27.55	2221	0.258444
铁岭市	2011	2.38848	0.385208	28647	27.61	2220	0.35844
铁岭市	2012	2.7158	0.392761	32130	28.38	2218	0.380099
铁岭市	2013	2.80239	0.438968	34148	29.45	2216	0.332996
铁岭市	2014	2.77972	0.444359	32562	34.42	2216	0.328252
铁岭市	2015	2.62602	0.471929	27885	40.53	2215	0.141868
铁岭市	2016	3.83668	0.465999	22178	43.73	2088	0.140653
铁岭市	2017	4.32047	0.420793	22484	44.1472	2012	0.133574
铁岭市	2018	4.42542	0.212091	23517	45.17	2013.42	0.127048
铁岭市	2019	4.4531	0.174894	24382	47.87	1793.37	0.139047
朝阳市	2004	0.9567	0.157368	4538	33.21	889	0.0383546
朝阳市	2005	1.08013	0.147216	6280	34.98	924	0.0340349
朝阳市	2006	1.10309	0.152292	7469	33.65	959	0.0397208
朝阳市	2007	1.18613	0.147216	9824	30.84	974	0.194328
朝阳市	2008	1.44002	0.147216	13114	29.06	961	0.180716
朝阳市	2009	1.45844	0.1523	15724	30.17	998	0.162654
朝阳市	2010	1.7291	0.16753	21536	28.65	998	0.149404
朝阳市	2011	2.39952	0.192913	26927	27.76	1023	0.222319
朝阳市	2012	2.91209	0.212863	30765	28.24	1026	0.228451
朝阳市	2013	3.30608	0.25891	29496	28.37	1070	0.165197
朝阳市	2014	3.43642	0.268301	33379	35.82	1113	0.17454
朝阳市	2015	3.39167	0.2682	28852	43.82	1022	0.0601825
朝阳市	2016	3.94026	0.151944	24285	50.42	1114	0.0469483
朝阳市	2017	4.24053	0.143568	25862	46.574	944	0.0497837
朝阳市	2018	4.64786	0.115342	28266	50.39	1035.96	0.0493848
朝阳市	2019	4.79131	0.124733	28761	47.51	914.561	0.0477461
盘锦市	2004	0.954589	0.761484	29591	20.12	2150	0.0167616
盘锦市	2005	1.02467	0.761484	34641	17.15	2169	0.0171982
盘锦市	2006	1.11927	0.687792	39316	16.99	2247	0.0175784
盘锦市	2007	1.14641	0.712356	43131	17.75	2291	0.0736421
盘锦市	2008	1.25305	0.786048	51214	17.33	2415	0.0650218
盘锦市	2009	1.26847	1.10538	50930	28.1	2751	0.115429
盘锦市	2010	1.46281	1.2282	66976	24.65	2460	0.104337
盘锦市	2011	1.36514	1.20364	79584	23.52	2606	0.125205
盘锦市	2012	1.29479	1.20541	87153	23.53	2624	0.14876
盘锦市	2013	1.44052	1.15621	104733	24.07	2598	0.157995
盘锦市	2014	1.4986	1.19877	90615	34.51	2658	0.152582
盘锦市	2015	1.51914	1.19459	87351	36.89	2748	0.0949673
盘锦市	2016	1.40509	1.06986	70110	42.44	1411	0.1247
盘锦市	2017	1.52724	0.91884	75682	38.7061	4285	0.084106
盘锦市	2018	1.66384	1.0234	84602	41.39	3414.21	0.0536587
盘锦市	2019	1.74576	1.02949	88983	38.49	2888.3	0.044676
葫芦岛市	2004	1.04704	0.345655	10777	34.87	702	0.0175214
葫芦岛市	2005	0.88717	0.326452	10960	37.56	706	0.0163927
葫芦岛市	2006	0.897086	0.316851	12672	37.91	761	0.0205107
葫芦岛市	2007	0.936678	0.326452	14965	36.78	774	0.0527872
葫芦岛市	2008	1.01109	0.336054	16351	38.82	782	0.0873702
葫芦岛市	2009	1.02748	0.297648	15856	42.42	799	0.116499
葫芦岛市	2010	1.1209	0.336054	20302	40.04	803	0.177082
葫芦岛市	2011	1.29624	0.345655	24789	39	783	0.259313
葫芦岛市	2012	1.43826	0.403265	27709	39	796	0.285682
葫芦岛市	2013	1.50019	0.441713	27682	39.99	793	0.306952
葫芦岛市	2014	1.53745	0.429902	28021	42.53	874	0.318758
葫芦岛市	2015	1.97261	0.434703	28176	44.37	883	0.0897291
葫芦岛市	2016	1.86691	0.438256	25347	48.36	896	0.0406425
葫芦岛市	2017	1.77683	0.391993	28158	38.5982	1633	0.0397966
葫芦岛市	2018	2.0192	0.312404	32012	42.52	1642.07	0.152624
葫芦岛市	2019	2.03684	0.139593	31802	46.08	1441.38	0.0431846
长春市	2004	1.12827	1.6042	21285	40.61	874	0.0129055
长春市	2005	1.1718	1.82295	23060	42.42	936	0.0136851
长春市	2006	1.00392	1.62851	23677	41.78	8769	0.0155755
长春市	2007	1.14335	1.68198	28132	40.19	8739	0.105094
长春市	2008	1.25382	1.81518	34193	40.29	7232	0.0936961
长春市	2009	1.37482	1.8443	37753	41.49	6716	0.104927
长春市	2010	1.53017	1.96078	43936	40.74	7347	0.104976
长春市	2011	1.74684	2.06271	52649	40.47	7819	0.110173
长春市	2012	1.96197	2.29567	58691	41.46	8034	0.0983588
长春市	2013	2.00179	2.03844	66443	40.22	7676	0.15755
长春市	2014	2.12777	1.98602	70891	41.12	7605	0.131189
长春市	2015	2.54851	2.08468	73324	43.69	7693	0.162702
长春市	2016	2.9444	2.17845	79434	45.2	1921	0.159372
长春市	2017	3.11593	2.20132	87548.5	42.3814	2179	0.206921
长春市	2018	3.25416	2.11348	95663	46.85	1331.61	0.16966
长春市	2019	2.78613	2.47358	78456	51.84	1348.59	0.191213
吉林市	2004	1.18535	0.169617	16239	40.68	897	0.0249679
吉林市	2005	1.19409	0.165929	14498	39.09	902	0.0308405
吉林市	2006	1.26958	0.173304	16796	39.28	937	0.0337802
吉林市	2007	1.43182	0.162242	23277	37.27	1213	0.0804057
吉林市	2008	1.69181	0.169617	30016	38.31	1217	0.0972775
吉林市	2009	1.82187	0.165893	34583	39.33	1231	0.195098
吉林市	2010	2.02202	0.173266	41479	39.44	1234	0.133092
吉林市	2011	2.37035	0.176952	50914	39.46	1232	0.112398
吉林市	2012	2.61962	0.195385	56244	40.32	1232	0.138683
吉林市	2013	2.85194	0.257306	61012	41.46	2558	0.169374
吉林市	2014	2.74355	0.24539	55548	42.66	2559	0.237901
吉林市	2015	3.20716	0.249287	56076	44.03	2559	0.145344
吉林市	2016	3.42314	0.221464	57818	47.18	2558	0.110837
吉林市	2017	3.45443	0.215691	55635	56.3296	2544	0.170511
吉林市	2018	3.4487	0.20288	53452	58.81	2544.56	0.0909314
吉林市	2019	2.58543	0.243549	34335	52.47	2545.56	0.124065
四平市	2004	1.14336	0.497159	8539	29.03	911	0.0219749
四平市	2005	1.15369	0.497159	10027	33.57	935	0.0190804
四平市	2006	1.27735	0.482955	11468	31.99	991	0.0306706
四平市	2007	1.30814	0.511364	14267	31.23	1009	0.0335192
四平市	2008	1.61151	0.433239	17739	32.72	1029	0.0564247
四平市	2009	1.63829	0.447443	19468	32.95	925	0.0350899
四平市	2010	1.75546	0.383523	22942	30.12	764	0.04822
四平市	2011	1.63576	0.319602	28874	28.7	7802	0.0502439
四平市	2012	1.87457	0.383523	33150	28.97	7167	0.0489668
四平市	2013	1.99267	0.383523	36901	29.24	6796	0.0588345
四平市	2014	1.9729	0.37642	36900	29.67	7094	0.077327
四平市	2015	2.24406	0.363927	37714	30.93	7551	0.0470221
四平市	2016	2.38234	0.385482	36732	35.48	5618	0.0335064
四平市	2017	2.33696	0.37241	33144	46.7589	5762	0.0650663
四平市	2018	2.29966	0.272146	29556	50.45	5008.89	0.0552353
四平市	2019	1.99253	0.250939	24979	49.87	4903.06	0.043794
辽源市	2004	1.02753	0.252968	8071	41.19	2160	0.0209875
辽源市	2005	1.10153	0.233508	11083	37.14	1074	0.0187482
辽源市	2006	1.17448	0.252968	13918	34.57	10780	0.0193461
辽源市	2007	1.49564	0.233508	17545	34.04	10786	0.0540416
辽源市	2008	1.82319	0.252968	21989	33.97	1003	0.0927778
辽源市	2009	2.16187	0.272427	27160	33.19	1126	0.0882855
辽源市	2010	2.36701	0.252918	33137	33.39	1126	0.0739499
辽源市	2011	2.96729	0.272374	40844	31.98	10747	0.0824788
辽源市	2012	3.08938	0.291829	49479	32.14	10900	0.0761162
辽源市	2013	2.94613	0.291829	57402	32.55	11015	0.074725
辽源市	2014	2.95214	0.270233	56467	33	10335	0.110892
辽源市	2015	3.37954	0.283074	59855	34.19	10533	0.108114
辽源市	2016	3.97701	0.290467	63480	35.09	10533	0.0456976
辽源市	2017	3.75201	0.284047	58170.5	43.7944	10268	0.0534881
辽源市	2018	4.03472	0.283852	52861	45.52	10650.1	0.0546331
辽源市	2019	2.93698	0.40856	35108	60.88	9321.81	0.0646585
通化市	2004	0.982672	0.190852	9563	36.35	598	0.0511938
通化市	2005	0.87674	0.210596	10258	36.87	599	0.0517903
通化市	2006	0.928372	0.204014	12495	37.11	10323	0.0555953
通化市	2007	1.03589	0.210596	15559	36.26	632	0.194753
通化市	2008	1.15745	0.204014	19703	35.93	609	0.238484
通化市	2009	1.23706	0.210596	22820	37.36	611	0.299208
通化市	2010	1.40122	0.21143	27690	37.5	616	0.311425
通化市	2011	1.5329	0.21143	34515	37.6	6484	0.313791
通化市	2012	1.67248	0.224244	39111	37.12	7218	0.464873
通化市	2013	1.88453	0.256279	45200	36.42	7337	0.728556
通化市	2014	1.95172	0.25442	45378	38.29	7376	0.482481
通化市	2015	2.34652	0.242826	45171	39.63	7220	0.469531
通化市	2016	2.48149	0.230336	42979	43.39	7152	0.704111
通化市	2017	2.75039	0.216692	40638	50.4608	7106	0.673491
通化市	2018	2.67866	0.230208	38297	52.74	7121.24	0.487194
通化市	2019	2.09	0.233154	33702	58.15	7247.88	0.422645
白山市	2004	0.92975	0.0743494	7528	33.78	2744	0.0499872
白山市	2005	1.13232	0.183014	12139	32.44	3411	0.0431201
白山市	2006	1.19518	0.0800686	14746	31.53	5187	0.0286607
白山市	2007	1.34073	0.0800686	18273	31.65	3154	0.088144
白山市	2008	1.50267	0.0800686	23159	32.07	2402	0.101049
白山市	2009	1.66814	0.0857878	27495	32.67	4323	0.0781472
白山市	2010	1.84593	0.091507	33524	29.74	3803	0.1203
白山市	2011	2.15558	0.108665	41325	31.17	3674	0.0921845
白山市	2012	2.54015	0.108665	50158	31.28	1064	0.108099
白山市	2013	2.79615	0.120103	53043	31.77	1047	0.180169
白山市	2014	2.83675	0.114139	53300	32.05	1028	0.215819
白山市	2015	3.30584	0.11431	53136	33.96	1017	0.119751
白山市	2016	3.5852	0.107741	56411	37.15	1032	0.164723
白山市	2017	3.90838	0.108655	56221	43.795	1037	0.114258
白山市	2018	3.91463	0.128592	56031	46.86	1043.52	0.0777984
白山市	2019	3.14962	0.075864	43744	61.52	1066.97	0.0943615
白城市	2004	1.08307	0.132337	6809	32.93	196	0.0941602
白城市	2005	1.18662	0.0699165	7550	36.66	198	0.0839764
白城市	2006	1.25516	0.0738007	9427	36.9	282	0.0892444
白城市	2007	1.41765	0.132064	11279	37.03	285	0.194434
白城市	2008	1.63171	0.135949	14327	38.77	289	0.13181
白城市	2009	1.72549	0.116527	17404	38.2	291	0.1
白城市	2010	2.02038	0.132064	21973	36	309	0.105238
白城市	2011	2.25652	0.10099	27374	33.07	310	0.0967947
白城市	2012	2.50914	0.104875	30576	34.75	5771	0.0996425
白城市	2013	2.92014	0.415615	34791	35.93	5771	0.102651
白城市	2014	2.96339	0.420486	34586	36.82	4197	0.123408
白城市	2015	3.54015	0.222912	35571	37.58	4197	0.134961
白城市	2016	4.41616	0.222951	35892	39.73	4181	0.134116
白城市	2017	4.28396	0.231997	33870.5	46.5907	4215	0.121073
白城市	2018	3.99919	0.241158	31849	47.72	3810.37	0.210056
白城市	2019	3.39221	0.124927	25980	58.33	3942.22	0.198821
松原市	2004	1.09626	0.142248	10165	21.82	451	0.00906145
松原市	2005	1.19969	0.151731	13175	22.03	452	0.00834357
松原市	2006	1.23747	0.132764	17049	20.96	470	0.00806455
松原市	2007	1.56426	0.142248	21710	24.49	407	0.0236437
松原市	2008	1.98947	0.132764	28486	25.85	430	0.0254612
松原市	2009	2.04937	0.137506	31421	32.43	468	0.0439372
松原市	2010	2.79949	0.132764	38136	31.17	472	0.0134198
松原市	2011	2.53914	0.137506	46749	33.81	6044	0.013461
松原市	2012	2.76787	0.175439	55177	35.51	5968	0.0172976
松原市	2013	2.67037	0.156472	58321	36.43	6063	0.0171344
松原市	2014	2.59162	0.144293	56868	37.46	6072	0.0155861
松原市	2015	2.88199	0.143677	58841	38.52	6074	0.0128199
松原市	2016	3.6645	0.145763	59413	41.82	6055	0.0260642
松原市	2017	3.38743	0.166817	54662.5	54.5209	6062	0.017314
松原市	2018	3.1533	0.111385	49912	58.63	5927.87	0.0143127
松原市	2019	2.03627	0.158951	26559	53.99	5918.09	0.0845205
哈尔滨市	2004	1.08339	0.619959	17463	45.34	825	0.0382275
哈尔滨市	2005	1.08475	0.623728	18852	48.32	838	0.036756
哈尔滨市	2006	1.19245	0.659531	21374	48.27	12537	0.0425916
哈尔滨市	2007	1.47214	0.648225	24768	48.69	12391	0.25318
哈尔滨市	2008	1.52448	0.635034	29012	48.82	12211	0.252742
哈尔滨市	2009	1.65531	0.689681	32053	51.28	12012	0.19888
哈尔滨市	2010	1.91475	0.808397	36951	50.96	11603	0.24383
哈尔滨市	2011	1.88306	0.853622	42736	50.63	11547	0.271209
哈尔滨市	2012	1.91059	0.853622	45810	52.84	11242	0.281099
哈尔滨市	2013	2.24227	0.710409	50423	53.54	10548	0.237506
哈尔滨市	2014	2.35734	0.795564	53872	54.86	10418	0.18778
哈尔滨市	2015	2.54747	0.769171	59027	55.92	11366	0.157975
哈尔滨市	2016	2.73105	0.786836	63445	57.59	10416	0.125136
哈尔滨市	2017	3.20208	0.740711	57193	60.9896	10622	0.139719
哈尔滨市	2018	3.53558	0.506839	66094	64.85	10400.2	0.190108
哈尔滨市	2019	3.25838	0.540376	55175	67.68	10541.6	0.297782
齐齐哈尔市	2004	1.099	0.150698	7549	39.77	327	0.0174428
齐齐哈尔市	2005	0.995654	0.129506	8003	47.1	325	0.0218256
齐齐哈尔市	2006	0.867749	0.14128	8860	45.38	8216	0.0237335
齐齐哈尔市	2007	0.849921	0.14128	10302	44.59	8144	0.0988959
齐齐哈尔市	2008	0.925148	0.129506	12272	42.25	9584	0.128356
齐齐哈尔市	2009	0.9092	0.138925	12714	40.97	7852	0.115464
齐齐哈尔市	2010	1.02066	0.14128	16309	37.55	7852	0.168174
齐齐哈尔市	2011	1.25796	0.13657	19815	35.92	7851	0.201134
齐齐哈尔市	2012	1.69091	0.145989	22139	38.44	7796	0.0883871
齐齐哈尔市	2013	1.45732	0.138925	22090	40.54	7799	0.0760648
齐齐哈尔市	2014	1.49609	0.145848	23099	43.24	7799	0.106778
齐齐哈尔市	2015	1.46142	0.137771	24430	44.83	7799	0.172877
齐齐哈尔市	2016	1.52638	0.141755	25690	46.38	7698	0.0338788
齐齐哈尔市	2017	1.56159	0.1296	26223	49.1801	7769	0.0703988
齐齐哈尔市	2018	1.59029	0.121665	26271	51.13	7769.33	0.085281
齐齐哈尔市	2019	1.46448	0.0924674	22667	48.35	8486.58	0.116404
牡丹江市	2004	0.962408	0.0763867	11168	44.45	583	0.0226012
牡丹江市	2005	0.847719	0.0714585	11285	49.29	578	0.0305802
牡丹江市	2006	0.833075	0.0763867	12713	49.85	8012	0.0295313
牡丹江市	2007	0.809645	0.0714585	15105	49.62	8012	0.133992
牡丹江市	2008	0.942092	0.0985634	17983	47.78	8007	0.145449
牡丹江市	2009	0.957489	0.0739226	22645	46.93	8007	0.17852
牡丹江市	2010	1.15971	0.0714585	27545	44.35	8180	0.270504
牡丹江市	2011	1.38627	0.0758391	33675	42.67	8214	0.306866
牡丹江市	2012	1.37139	0.075511	37001	37.72	8226	0.197105
牡丹江市	2013	1.70166	0.0781148	46953	42.78	8014	0.195498
牡丹江市	2014	1.80721	0.0798413	42792	46.68	7768	0.140955
牡丹江市	2015	1.93977	0.0740207	47356	47.11	7952	0.111986
牡丹江市	2016	1.94665	0.0671698	49618	47.61	7952	0.0458074
牡丹江市	2017	2.63012	0.0693847	49214	52.7953	7283	0.0778595
牡丹江市	2018	2.66011	0.0627141	48201	53.14	7250.76	0.0817296
牡丹江市	2019	1.80191	0.0518454	32811	56.9	7250.76	0.129055
佳木斯市	2004	1.10754	0.0886742	9605	43.08	762	0.021964
佳木斯市	2005	0.98924	0.0856164	9812	49.01	757	0.0333274
佳木斯市	2006	0.797642	0.0825587	11295	49.02	569	0.0232644
佳木斯市	2007	0.778251	0.0856164	13690	48.65	569	0.0782743
佳木斯市	2008	0.808231	0.0856164	15871	47.55	9793	0.08532
佳木斯市	2009	0.752296	0.103963	17172	45.1	9528	0.0762723
佳木斯市	2010	0.813511	0.0917319	20254	45.3	6655	0.0822119
佳木斯市	2011	0.960063	0.0917319	24853	43.16	6400	0.0980315
佳木斯市	2012	1.08451	0.0917319	27774	44.01	6168	0.175162
佳木斯市	2013	1.28285	0.0917319	32733	41.75	6228	0.0792402
佳木斯市	2014	1.36186	0.0872982	32864	44.68	6228	0.0441134
佳木斯市	2015	1.5948	0.088613	35069	44.92	6187	0.118679
佳木斯市	2016	1.84467	0.0861974	36878	47.28	6177	0.0506607
佳木斯市	2017	2.04007	0.0857387	41419	43.1738	3181	0.0235774
佳木斯市	2018	1.7927	0.0916096	39344	44.76	3138.3	0.0265007
佳木斯市	2019	1.3766	0.0809381	32788	41.34	3138.3	0.0621232
鸡西市	2004	1.01326	0.0710133	10028	29.53	394	0.0176169
鸡西市	2005	0.866197	0.0576983	10612	40.11	390	0.0178855
鸡西市	2006	0.930331	0.0665749	12360	39.46	9515	0.0209549
鸡西市	2007	0.797069	0.0665749	13858	41.64	9329	0.066466
鸡西市	2008	0.822009	0.0621366	16541	40.97	9336	0.0694881
鸡西市	2009	0.627371	0.0488216	18547	34.26	9342	0.0734841
鸡西市	2010	0.679789	0.115397	22083	32.14	9424	0.0788571
鸡西市	2011	0.749871	0.0576983	26864	31.57	9424	0.0878046
鸡西市	2012	0.755242	0.05326	31076	30.71	9127	0.153553
鸡西市	2013	0.859897	0.0488216	30530	32.29	9103	0.0670156
鸡西市	2014	0.820825	0.055701	27881	35.87	9137	0.095541
鸡西市	2015	0.812363	0.0497537	28222	37.61	8968	0.105365
鸡西市	2016	0.969925	0.0462474	28647	40.08	8952	0.0991938
鸡西市	2017	0.95319	0.0450047	29369	39.7811	8580	0.127876
鸡西市	2018	1.05467	0.0443833	30784	40.55	8388.26	0.0884565
鸡西市	2019	1.12245	0.0548279	32278	40.65	8188.04	0.0983696
鹤岗市	2004	1.05296	0.054615	9517	30.99	150	0.0184979
鹤岗市	2005	1.099	0.054615	10198	35.69	150	0.0223097
鹤岗市	2006	1.16477	0.054615	11863	34.69	6753	0.0226151
鹤岗市	2007	1.19553	0.0477881	14048	34.41	7028	0.0950044
鹤岗市	2008	1.29933	0.054615	16887	32.34	7181	0.0870098
鹤岗市	2009	1.23952	0.054615	18509	29.13	6724	0.0973139
鹤岗市	2010	1.34527	0.054574	23044	26.95	6652	0.183675
鹤岗市	2011	1.56674	0.0477522	28774	24.12	6615	0.153358
鹤岗市	2012	1.54261	0.0477588	32968	23.71	6864	0.117994
鹤岗市	2013	1.6935	0.0477588	29631	25.94	6553	0.282894
鹤岗市	2014	1.94729	0.0491915	24154	32.82	6506	0.195058
鹤岗市	2015	2.02245	0.0439403	24981	34.93	6498	0.142597
鹤岗市	2016	1.95941	0.0423053	25244	35.81	6471	0.130934
鹤岗市	2017	1.94786	0.0459598	27658	35.3343	6412	0.085787
鹤岗市	2018	2.0832	0.046778	28891	37.44	6188.24	0.12349
鹤岗市	2019	2.42539	0.0387999	33981	41.86	5935.29	0.146637
双鸭山市	2004	1.03285	0.0489259	9047	28.39	286	0.017053
双鸭山市	2005	0.946951	0.0533737	9728	29.95	286	0.0206656
双鸭山市	2006	0.896112	0.0667171	11275	30.08	3873	0.0198548
双鸭山市	2007	0.951874	0.0517197	13744	28.56	3907	0.0451485
双鸭山市	2008	1.03868	0.0517197	17285	25.56	3907	0.0838681
双鸭山市	2009	0.984352	0.0517041	19817	25.81	3907	0.0392284
双鸭山市	2010	1.12625	0.0473954	26215	24.88	3907	0.0852024
双鸭山市	2011	1.34936	0.0517041	33215	21.83	4000	0.107473
双鸭山市	2012	1.43444	0.0560128	37490	21.69	3966	0.0955908
双鸭山市	2013	1.48528	0.0560128	37007	23.25	3958	0.107997
双鸭山市	2014	1.49243	0.104337	28964	35.87	3975	0.13897
双鸭山市	2015	1.94446	0.0542464	29237	39.01	4051	0.0857998
双鸭山市	2016	1.85599	0.0674573	29959	41.68	4051	0.0294698
双鸭山市	2017	1.87573	0.0511	32277	38.676	4068	0.0217537
双鸭山市	2018	1.99403	0.0512741	35527	41.12	3872.88	0.0499598
双鸭山市	2019	1.83689	0.0445287	33857	46.8	3872.88	0.0577101
七台河市	2004	1.01022	0.20897	10994	34.54	294	0.026524
七台河市	2005	1.00296	0.20897	11989	37.8	291	0.0357232
七台河市	2006	1.03932	0.20897	12870	37.86	6499	0.0309034
七台河市	2007	1.09866	0.20897	15137	37.97	6527	0.0684377
七台河市	2008	1.20266	0.20897	20826	31.95	6570	0.0686039
七台河市	2009	1.19426	0.20897	25534	28.2	6793	0.0532475
七台河市	2010	1.32652	0.208936	32890	26.48	6181	0.0363668
七台河市	2011	1.53064	0.20897	33209	28.06	1287	0.0594691
七台河市	2012	1.56749	0.20897	32308	31.55	1313	0.0787868
七台河市	2013	1.48544	0.241119	26194	40.56	1313	0.0627831
七台河市	2014	1.5505	0.222955	25123	44.73	1314	0.100813
七台河市	2015	1.69402	0.219097	24823	47.13	5985	0.0665408
七台河市	2016	1.90174	0.187751	26500	48.79	2140	0.0347579
七台河市	2017	2.57298	0.185501	28836	45.3289	6071	0.14001
七台河市	2018	2.66678	0.158158	32028	47.79	6193.79	0.0609606
七台河市	2019	2.36588	0.209855	29912	44.48	6177.51	0.121861
黑河市	2004	1.09553	0.0320112	6175	43.73	933	0.0274325
黑河市	2005	1.31106	0.0392864	6877	46.15	933	0.0274698
黑河市	2006	1.48937	0.0451067	7795	45.93	7622	0.0408295
黑河市	2007	1.84185	0.0480168	9370	42.69	7459	0.145083
黑河市	2008	2.18466	0.0392864	11800	39.53	7368	0.144926
黑河市	2009	1.95786	0.0267757	12882	39.42	5057	0.13755
黑河市	2010	2.27368	0.0243416	14994	38.09	5057	0.122712
黑河市	2011	1.60753	0.0243416	18103	34.34	5129	0.156845
黑河市	2012	1.72745	0.0293083	18892	33.01	5143	0.143492
黑河市	2013	1.86159	0.0381008	22654	34.59	5151	0.294447
黑河市	2014	1.90283	0.0310668	24731	35.84	5179	0.194109
黑河市	2015	2.73854	0.032631	26575	36.51	5215	0.254698
黑河市	2016	2.70992	0.0219771	27889	37.7	5215	0.136489
黑河市	2017	3.25493	0.021804	30236	37.6062	5312	0.109338
黑河市	2018	3.30833	0.0219915	31592	40.06	5308.46	0.100687
黑河市	2019	3.75519	0.0163819	36478	45.4	5308.46	0.0663212
伊春市	2004	0.930096	0.0366312	8403	31.92	59	0.0562259
伊春市	2005	0.770825	0.0366312	8974	37.38	59	0.069525
伊春市	2006	0.682286	0.0396838	10156	37.47	4905	0.0789515
伊春市	2007	0.675787	0.0396838	12001	36.9	4795	0.177132
伊春市	2008	0.730607	0.0427363	14029	36.95	4717	0.168816
伊春市	2009	0.685118	0.0457889	13530	31.87	4518	0.199001
伊春市	2010	0.725101	0.0457889	15924	30.41	4391	0.169531
伊春市	2011	0.808104	0.0488415	18142	30.43	4371	0.397155
伊春市	2012	0.824652	0.0488415	20686	30.95	4374	0.167287
伊春市	2013	0.935172	0.0488415	23129	32.35	4383	0.19164
伊春市	2014	1.02115	0.0487805	20885	34.9	4383	0.163343
伊春市	2015	1.15728	0.0519207	20414	38.4	4196	0.163056
伊春市	2016	1.39866	0.051311	21043	38.03	4195	0.104651
伊春市	2017	1.24627	0.0514329	22109	37.9315	4255	0.101418
伊春市	2018	1.24526	0.0470122	23837	40.51	4254.66	0.0676996
伊春市	2019	1.35848	0.0475915	26384	43.19	3697.2	0.0715719
大庆市	2004	1.05249	1.50808	47667	12.18	237	0.00325928
大庆市	2005	1.02729	1.64947	53199	11.05	240	0.00153492
大庆市	2006	1.02612	1.71544	60493	11.22	8095	0.00227114
大庆市	2007	1.04031	2.01235	67161	12.01	7295	0.0581196
大庆市	2008	1.19498	2.48362	80655	11.8	5869	0.0536216
大庆市	2009	1.05301	2.46006	76068	17.53	4768	0.0638678
大庆市	2010	1.36174	2.38466	103576	14.48	4620	0.0428301
大庆市	2011	1.85839	2.37523	133301	14.36	4418	0.0371772
大庆市	2012	1.86064	2.23957	142067	15.27	4387	0.0495418
大庆市	2013	1.95549	2.22098	147756	16.44	4548	0.0610905
大庆市	2014	2.27169	2.22395	146518	19.76	4761	0.0203777
大庆市	2015	2.11796	2.18672	110113	28.59	4667	0.0169233
大庆市	2016	1.96051	2.14756	94690	36.76	4542	0.0464904
大庆市	2017	1.9788	2.09147	97677	36.5117	4311	0.0185449
大庆市	2018	1.98951	2.01023	102639	38.92	4411.35	0.0254359
大庆市	2019	1.74256	1.83301	94289	38.82	4430.06	0.131546
绥化市	2004	1.10513	0.0858025	7143	44.72	7475	0.0145624
绥化市	2005	0.802985	0.0829425	6244	41.71	5600	0.0182446
绥化市	2006	0.778282	0.0858025	7027	42.63	6217	0.0179223
绥化市	2007	0.839921	0.0858025	7814	41.85	6372	0.0788889
绥化市	2008	0.999655	0.0858025	9397	41.75	6082	0.0826151
绥化市	2009	1.17943	0.860733	10471	41.15	6005	0.0890937
绥化市	2010	1.27612	0.103232	12576	38.84	6015	0.0871387
绥化市	2011	1.01883	0.0860264	15617	35.33	6179	0.100341
绥化市	2012	1.04827	0.102993	18474	33.06	3449	0.154984
绥化市	2013	0.932216	0.0860264	21293	34.31	3579	0.0719171
绥化市	2014	0.978494	0.102113	21467	33.35	3784	0.0698596
绥化市	2015	1.16744	0.089955	23095	33.97	3827	0.158866
绥化市	2016	1.21523	0.100938	24109	35.56	3956	0.0460757
绥化市	2017	1.43858	0.0912167	24965	36.8811	3956	0.0402367
绥化市	2018	1.53917	0.0815531	25841	38.76	4043.33	0.0311492
绥化市	2019	1.26127	0.0797178	21045	42.92	4035.79	0.0255858
上海	2004	1.10666	17.8048	55307	47.86	1970	0.181336
上海	2005	1.14154	20.1895	51474	50.48	2718	0.173909
上海	2006	1.24891	22.252	57695	50.59	2774	0.195519
上海	2007	1.42128	24.653	66367	52.58	2930	0.867732
上海	2008	1.5855	28.5962	73124	53.66	2978	0.878032
上海	2009	1.74923	32.9811	78989	59.36	3030	1.43098
上海	2010	1.95772	36.6719	76074	57.28	3630	1.17694
上海	2011	2.04126	19.4953	82560	58.05	3702	1.13826
上海	2012	2.07706	19.2902	85373	60.45	3754	1.21609
上海	2013	2.15589	32.0189	150853	62.24	3809	1.19275
上海	2014	2.22966	39.3533	97370	64.82	3826	1.11293
上海	2015	2.26028	40.2665	103796	67.76	3809	1.08206
上海	2016	2.52981	36.5673	116562	69.78	3816	1.21266
上海	2017	2.97733	38.7172	125772	69.18	3814	1.2728
上海	2018	2.90726	42.4126	134982	69.9	3822.7	1.30467
上海	2019	3.22388	57.0967	157279	72.73	3829.57	1.02092
南京市	2004	0.976885	4.66424	33050	43.72	1005	0.0684293
南京市	2005	0.963121	5.08964	40887	46.9	1084	0.0691756
南京市	2006	1.01557	5.25676	46114	48.01	1815	0.0900396
南京市	2007	1.10832	5.1656	53639	48.42	1933	0.201466
南京市	2008	1.24177	5.46946	60808	49.99	1546	0.251062
南京市	2009	1.29376	5.83409	67455	51.31	1593	0.326015
南京市	2010	1.43372	6.6191	64037	51.85	1600	0.321811
南京市	2011	1.58979	7.08972	76263	52.4	1532	0.391835
南京市	2012	1.69176	8.03097	88525	53.4	1417	0.486032
南京市	2013	1.72076	10.0046	124600	54.38	1419	0.500795
南京市	2014	1.81602	10.9762	107545	56.49	1440	0.506932
南京市	2015	1.98801	12.3105	118171	57.32	1462	0.535246
南京市	2016	2.18241	12.4488	127264	58.39	1484	0.505855
南京市	2017	2.42844	13.0864	140075	54.5788	1521	0.574423
南京市	2018	2.61093	11.985	152886	61.04	1554.98	0.628249
南京市	2019	2.91706	14.5834	165681	62.02	1588.46	0.695745
无锡市	2004	1.09859	2.04678	52825	40.2	1378	0.0108043
无锡市	2005	1.22945	2.1721	62331	37.81	1408	0.0103506
无锡市	2006	1.40604	2.23475	72489	38.8	1432	0.0157154
无锡市	2007	1.76193	2.1721	83923	40.1	1454	0.162235
无锡市	2008	2.12516	2.29741	95460	40.95	1463	0.183532
无锡市	2009	2.38273	2.36007	107365	41.3	3178	0.294317
无锡市	2010	2.57222	2.59347	92166	42.8	2074	0.327501
无锡市	2011	2.8812	2.61509	107437	44.03	2062	0.352391
无锡市	2012	3.09449	2.55025	117357	45.17	2089	0.389645
无锡市	2013	2.85721	3.5228	170978	46.02	2110	0.434961
无锡市	2014	2.88089	3.32829	126389	48.4	2115	0.432333
无锡市	2015	3.04962	3.37454	130938	49.11	1953	0.422269
无锡市	2016	3.40606	3.43635	141258	51.34	1990	0.404342
无锡市	2017	3.85681	3.69462	157764	47.315	2020	0.401558
无锡市	2018	4.20536	3.35033	174270	51.14	2052.23	0.434292
无锡市	2019	4.24472	5.71299	180044	51.48	2089.26	0.465829
徐州市	2004	0.976885	0.781666	12005	36.47	3416	0.0155138
徐州市	2005	0.963027	0.826079	13697	35.33	2767	0.0163016
徐州市	2006	1.01489	0.843844	15363	35.46	4818	0.018834
徐州市	2007	1.11126	0.719488	17909	36.02	3657	0.114095
徐州市	2008	1.24686	0.541837	21367	36.64	3677	0.132996
徐州市	2009	1.35248	0.692841	25100	37.29	3768	0.154939
徐州市	2010	1.49856	0.719424	34084	39.71	3547	0.154422
徐州市	2011	1.66721	0.843769	41407	40.55	3499	0.291487
徐州市	2012	1.74249	0.89706	46877	41.47	3533	0.313453
徐州市	2013	1.7007	0.905942	44050	42.5	3901	0.326557
徐州市	2014	1.84191	1.05397	57655	45.21	3963	0.352196
徐州市	2015	1.97056	1.00952	61511	46.24	3106	0.360722
徐州市	2016	2.20151	0.951976	66845	47.38	3024	0.357406
徐州市	2017	2.60008	0.942966	71880	46.2024	3286	0.326282
徐州市	2018	2.88293	0.957501	76915	49.03	3417.61	0.376791
徐州市	2019	3.20125	0.983935	81138	50.1	3431.83	0.362047
常州市	2004	0.996608	1.12	31665	36.5	1165	0.0163818
常州市	2005	1.0053	1.23429	31997	34.58	1184	0.013588
常州市	2006	1.0605	1.14286	44440	35.85	4502	0.0131829
常州市	2007	1.15821	1.25428	52840	36.96	3184	0.239762
常州市	2008	1.30355	1.3683	61503	37.98	3114	0.249729
常州市	2009	1.36894	1.48233	70138	39.62	3328	0.230038
常州市	2010	1.65469	1.71546	67327	41.43	3437	0.286
常州市	2011	1.81572	1.98994	77485	42.4	3572	0.349901
常州市	2012	2.04709	1.55535	85039	43.9	3665	0.476885
常州市	2013	1.90184	2.17292	119151	45.22	3798	0.507045
常州市	2014	2.02239	2.65325	104423	48.05	3035	0.442778
常州市	2015	2.1576	2.82777	112221	49.51	2399	0.431431
常州市	2016	2.41815	2.56117	122721	50.9	2429	0.416013
常州市	2017	2.71874	3.15021	135999	47.696	2441	0.379084
常州市	2018	2.94479	4.04254	149277	51.5	3029.99	0.360188
常州市	2019	3.15365	3.8559	156390	50.19	2945.98	0.361167
苏州市	2004	1.09269	0.624411	57992	32.03	1222	0.0123536
苏州市	2005	1.11508	0.718662	54164	31.2	1183	0.0122041
苏州市	2006	1.20587	0.61263	78801	32.66	4884	0.0108376
苏州市	2007	1.32505	0.636192	91911	34.56	2897	0.254253
苏州市	2008	1.59956	0.70688	106863	36.36	2969	0.339767
苏州市	2009	1.77234	0.70688	122565	39.41	3087	0.371709
苏州市	2010	1.97817	0.860038	93043	41.38	1769	0.386942
苏州市	2011	2.19575	0.930726	102129	42.75	1852	0.500187
苏州市	2012	2.33846	1.00141	114029	44.24	1827	0.554377
苏州市	2013	2.1003	2.76861	199017	45.73	1882	0.586731
苏州市	2014	2.14227	2.67991	129925	48.43	1926	0.550828
苏州市	2015	2.28512	2.86	136702	49.94	1967	0.609001
苏州市	2016	2.52119	2.95714	145556	51.54	2049	0.615182
苏州市	2017	2.80107	3.03893	159660	47.6498	2185	0.716114
苏州市	2018	3.15949	3.64734	173765	50.81	2344.34	0.818809
苏州市	2019	3.21466	4.73259	179174	51.51	2520.15	0.943959
南通市	2004	1.0451	0.537433	15806	33.69	2199	0.0193302
南通市	2005	1.13269	0.499938	19979	33.03	2225	0.0171866
南通市	2006	1.19268	0.524934	22826	34.42	3046	0.0142407
南通市	2007	1.34816	0.537433	27500	35.09	5142	0.202218
南通市	2008	1.5211	0.512436	32815	35.06	4450	0.20244
南通市	2009	1.55263	0.512436	37642	35.81	4405	0.248357
南通市	2010	1.72227	0.537433	47419	37.25	4607	0.288322
南通市	2011	1.89493	0.549931	56005	38.52	3090	0.320353
南通市	2012	1.99214	0.624922	62506	40.04	3860	0.315219
南通市	2013	1.9059	2.51219	65696	41.08	3741	0.378371
南通市	2014	2.01568	2.02863	77457	44.24	3887	0.385443
南通市	2015	2.11681	1.8288	84236	45.8	4082	0.394737
南通市	2016	2.3788	1.78216	92702	47.74	4128	0.337356
南通市	2017	2.93531	1.46166	104011	44.0506	4016	0.352191
南通市	2018	3.35027	1.14077	115320	48.43	4105.78	0.448309
南通市	2019	3.66574	1.30761	128294	46.39	4159.8	0.351806
连云港市	2004	0.976885	0.546667	8891	33.5	652	0.0297099
连云港市	2005	0.963017	0.533333	10003	35.33	687	0.0362743
连云港市	2006	1.01555	0.52	11084	35.95	1630	0.0265842
连云港市	2007	1.10733	0.586667	12857	36.24	1169	0.203112
连云港市	2008	1.25016	0.653333	15458	36.3	1044	0.295907
连云港市	2009	1.34039	0.666667	19229	37.3	1079	0.275796
连云港市	2010	1.5088	0.68	26987	39.02	1088	0.357401
连云港市	2011	1.65047	0.774787	32119	39.14	1176	0.417754
连云港市	2012	1.75107	0.748523	36470	39.6	1222	0.467289
连云港市	2013	1.82026	1.11622	34335	40.26	1230	0.496426
连云港市	2014	1.94235	1.06369	44277	41.42	1232	0.510552
连云港市	2015	2.08375	1.07748	48416	42.53	1463	0.51096
连云港市	2016	2.25493	1.01116	52987	43.13	1464	0.422053
连云港市	2017	2.50305	1.03874	57159.5	41.3836	1529	0.33354
连云港市	2018	2.66112	1.3023	61332	44.69	1533.75	0.357921
连云港市	2019	2.92369	1.28676	69523	45.03	1533.75	0.448232
淮安市	2004	0.976885	0.258141	9597	30.6	8777	0.00992075
淮安市	2005	0.963053	0.287927	11254	33.14	9409	0.0111604
淮安市	2006	1.01654	0.218427	12278	34.11	1925	0.0133167
淮安市	2007	1.10531	0.19857	14347	34.79	4185	0.165179
淮安市	2008	1.23749	0.218427	17104	35	4405	0.249009
淮安市	2009	1.30798	0.188642	20946	36.49	4885	0.258596
淮安市	2010	1.45663	0.208499	28861	39.26	5383	0.322923
淮安市	2011	1.62239	0.19857	35181	39.78	5677	0.369775
淮安市	2012	1.71396	0.248213	39992	40.8	6040	0.387327
淮安市	2013	1.74332	0.645353	38985	41.75	6081	0.411961
淮安市	2014	1.80876	0.677966	50736	44.08	6133	0.432412
淮安市	2015	1.95928	0.592423	56460	45.93	6461	0.438966
淮安市	2016	2.17078	0.518445	62446	47.74	5226	0.30479
淮安市	2017	2.4318	0.487238	67825	43.9583	4876	0.292611
淮安市	2018	2.87929	0.540578	73204	48.16	5180.99	0.259624
淮安市	2019	3.13412	0.825922	78543	48.25	5419.94	0.234306
盐城市	2004	0.976885	0.260295	10928	32.26	5618	0.0107074
盐城市	2005	0.963113	0.212102	12904	33.26	443	0.0110061
盐城市	2006	1.01995	0.223898	14647	33.42	1598	0.00989559
盐城市	2007	1.09303	0.271035	16987	34.07	2677	0.164068
盐城市	2008	1.21376	0.265143	19775	34.28	2886	0.146576
盐城市	2009	1.48018	0.22979	23607	34.58	3106	0.233605
盐城市	2010	1.65773	0.241574	31640	36.95	3221	0.258093
盐城市	2011	1.82198	0.247466	38222	37.82	2353	0.429451
盐城市	2012	1.92624	0.276927	43172	38.17	2371	0.516708
盐城市	2013	1.9131	0.447796	42178	38.85	2418	0.569354
盐城市	2014	2.04841	0.448881	53115	40.77	2658	0.616101
盐城市	2015	2.21274	0.440553	58299	42.08	2232	0.686291
盐城市	2016	2.41123	0.448881	63278	43.53	2230	0.707155
盐城市	2017	2.6973	0.410726	69632.5	41.2201	2248	0.492458
盐城市	2018	2.90652	0.589274	75987	45.15	2205.63	0.5184
盐城市	2019	3.40991	0.615085	79149	47.54	2306.16	0.467204
扬州市	2004	0.976885	0.648176	17359	36.6	924	0.0151117
扬州市	2005	0.963028	0.648176	20389	34.01	1189	0.0118761
扬州市	2006	1.01581	0.66325	24048	35	2808	0.0144343
扬州市	2007	1.15141	0.66325	28585	35.28	3344	0.178376
扬州市	2008	1.29899	0.678324	34238	35.47	2820	0.194421
扬州市	2009	1.44249	0.678324	40418	36.06	2797	0.220347
扬州市	2010	1.77215	0.713094	49786	37.62	2818	0.304056
扬州市	2011	1.8347	0.788955	58950	38.7	2570	0.368452
扬州市	2012	1.95152	0.849643	65692	40.01	2582	0.334481
扬州市	2013	1.83408	2.12411	70696	41.02	2638	0.32177
扬州市	2014	1.9836	2.71582	82654	42.86	2628	0.305662
扬州市	2015	2.14302	1.96177	89647	43.89	2631	0.328368
扬州市	2016	2.51924	1.94204	99151	44.96	2808	0.275994
扬州市	2017	2.8403	1.71446	110048	42.5713	2915	0.29577
扬州市	2018	3.01322	1.57321	120944	47.01	2935.91	0.293624
扬州市	2019	3.26959	2.56486	128856	47.51	2959.74	0.29641
镇江市	2004	0.976885	1.24773	29235	36.67	936	0.0218265
镇江市	2005	0.963015	1.16974	29534	34.97	945	0.0177246
镇江市	2006	1.01559	1.14375	38088	35.37	1747	0.0144491
镇江市	2007	1.10613	1.22173	44894	36.39	1556	0.146011
镇江市	2008	1.24704	1.29971	52391	36.48	1552	0.175715
镇江市	2009	1.339	1.3777	62084	37.32	1566	0.221748
镇江市	2010	1.50067	1.3517	63280	39.52	1577	0.263624
镇江市	2011	1.64276	1.94957	73981	40.59	1580	0.303031
镇江市	2012	1.7511	2.13153	83650	41.63	1577	0.389189
镇江市	2013	1.82818	2.39147	107621	42.66	1594	0.365643
镇江市	2014	1.89299	2.57812	102652	46.12	1598	0.365
镇江市	2015	2.03192	2.49714	110351	46.9	1601	0.350323
镇江市	2016	2.26887	2.39583	120603	47.62	1603	0.351606
镇江市	2017	2.62872	2.16458	123754	46.6647	1605	0.31551
镇江市	2018	2.97487	1.53099	126906	47.78	1599.66	0.407417
镇江市	2019	3.14588	2.42161	128981	48.03	1599.84	0.443664
泰州市	2004	0.976885	0.587118	14014	34.32	1447	0.0237096
泰州市	2005	0.963008	0.55201	17474	31.1	1372	0.0127089
泰州市	2006	1.01597	0.534759	19933	32.1	1985	0.01317
泰州市	2007	1.12131	0.517509	23933	33.19	1769	0.166972
泰州市	2008	1.18908	0.431258	27843	34.17	1643	0.19362
泰州市	2009	1.27117	0.500259	33166	35.17	1770	0.22322
泰州市	2010	1.40965	0.622084	44118	37.64	1818	0.213885
泰州市	2011	1.56836	0.743045	52395	38.77	1910	0.217959
泰州市	2012	1.68222	0.881286	58378	39.8	1903	0.215393
泰州市	2013	1.56691	1.15777	59191	40.8	2198	0.256393
泰州市	2014	1.60357	1.05409	72706	43.44	2244	0.226988
泰州市	2015	1.78849	1.13254	79479	44.96	2277	0.303967
泰州市	2016	2.13474	1.52065	88330	47	2136	0.284023
泰州市	2017	2.50324	1.61534	99159	43.9014	2127	0.280135
泰州市	2018	2.68527	1.34457	109988	46.86	2191.92	0.29609
泰州市	2019	2.68787	1.44592	110731	45.1	2208	0.345802
宿迁市	2004	0.976885	0.187025	6462	29.11	1719	0.0052445
宿迁市	2005	0.962974	0.12858	7188	30.07	1859	0.00438911
宿迁市	2006	1.01339	0.12858	8618	31.58	1895	0.00383091
宿迁市	2007	1.10407	0.140269	10217	32.01	1918	0.155295
宿迁市	2008	1.24378	0.105202	12289	32.99	1886	0.211263
宿迁市	2009	1.31516	0.105202	15381	34.39	1995	0.289979
宿迁市	2010	1.46805	0.116891	22525	37.39	2149	0.300022
宿迁市	2011	1.63459	0.105202	27839	37.6	2381	0.34947
宿迁市	2012	1.73931	0.105202	31722	38	2548	0.471285
宿迁市	2013	1.67744	0.2229	29830	38.43	1798	0.540598
宿迁市	2014	1.83546	0.269826	39963	38.9	1909	0.508733
宿迁市	2015	1.95444	0.237916	43853	39.35	1987	0.406361
宿迁市	2016	2.15144	0.234632	48311	39.81	2072	0.367059
宿迁市	2017	2.37397	0.215978	52108.5	38.7285	2157	0.287054
宿迁市	2018	2.55407	0.288362	55906	42.55	2292.94	0.427019
宿迁市	2019	2.77841	0.405561	62840	46.8	2388.68	0.478864
杭州市	2004	1.092	1.66305	38858	41.47	2313	0.032501
杭州市	2005	1.11579	1.82574	44853	44.09	2379	0.032311
杭州市	2006	1.18886	2.21138	51878	45.1	3490	0.0349498
杭州市	2007	1.29755	2.49458	52590	45.85	3098	0.296473
杭州市	2008	1.4436	2.78983	70832	46.29	3164	0.387949
杭州市	2009	1.49446	3.15739	63333	49.33	2979	0.433845
杭州市	2010	1.66525	5.13377	69828	48.69	3255	0.485041
杭州市	2011	1.84178	5.57966	80478	49.27	3336	0.497543
杭州市	2012	1.94962	6.21568	88962	50.94	3567	0.515096
杭州市	2013	2.04048	5.19402	118013	52.93	3762	0.554442
杭州市	2014	2.14214	5.16239	103813	55.25	3772	0.569273
杭州市	2015	2.27199	5.23536	112230	58.24	3527	0.697986
杭州市	2016	2.53062	6.93101	124286	60.89	3791	0.662196
杭州市	2017	2.74612	6.88009	135113	58.6995	3689	0.732532
杭州市	2018	2.94608	5.25438	140180	63.9	3766.68	0.875029
杭州市	2019	3.30694	5.72207	152465	66.17	3950.35	0.963949
嘉兴市	2004	1.02709	1.22605	31506	32.14	414	0.047194
嘉兴市	2005	1.06427	1.30268	34706	33.91	416	0.0499456
嘉兴市	2006	1.1394	1.37931	40206	33.51	2888	0.0647237
嘉兴市	2007	1.23754	1.50702	47157	33.97	2661	0.261342
嘉兴市	2008	1.36382	1.58365	43129	34.4	2672	0.287765
嘉兴市	2009	1.41133	1.83908	44898	36.39	3097	0.307644
嘉兴市	2010	1.57504	1.86462	52143	36.24	3051	0.327632
嘉兴市	2011	1.74013	2.17114	59256	37.24	3322	0.353978
嘉兴市	2012	1.84038	2.42656	63704	39.3	3450	0.361707
嘉兴市	2013	1.94832	2.24777	90973	40.2	3619	0.383036
嘉兴市	2014	2.05368	2.34406	73458	41.58	3910	0.420181
嘉兴市	2015	2.11578	2.36705	76850	43.44	3742	0.464989
嘉兴市	2016	2.3452	2.36112	83968	44.4	4115	0.464402
嘉兴市	2017	2.51374	3.3874	94510	39.5537	3115	0.462306
嘉兴市	2018	2.84898	3.36349	103858	43.77	3101.17	0.48992
嘉兴市	2019	3.00449	3.25101	112751	43.89	3074.74	0.615248
湖州市	2004	1.02532	0.395325	22966	34.23	454	0.0187746
湖州市	2005	1.41802	0.429701	25030	35.39	1654	0.041428
湖州市	2006	0.863405	0.498453	29527	34.2	1405	0.0427587
湖州市	2007	0.921077	0.515641	34596	34.94	1206	0.261137
湖州市	2008	1.01051	0.635957	40089	34.66	1254	0.272057
湖州市	2009	1.02845	0.635957	38865	36.77	1243	0.294874
湖州市	2010	1.09831	0.687521	45323	37.07	1332	0.282155
湖州市	2011	1.19783	0.549828	52477	38.56	1327	0.300996
湖州市	2012	1.25767	0.687285	57350	39.37	1342	0.311608
湖州市	2013	1.24112	0.772665	68823	40.17	1355	0.333333
湖州市	2014	1.29711	0.760309	66917	42.77	1381	0.356923
湖州市	2015	1.39193	0.753265	70894	44.87	1408	0.402741
湖州市	2016	1.45286	0.733849	77110	46.29	1428	0.408055
湖州市	2017	1.57714	0.786426	82952	43.2229	1456	0.456228
湖州市	2018	1.69579	0.794845	90304	48.46	1484.34	0.580328
湖州市	2019	1.90488	0.886426	102593	44.63	1472.63	0.599452
舟山市	2004	1.05594	1.18056	21855	38.92	317	0.0641391
舟山市	2005	1.09437	1.18056	28936	46.06	317	0.0600373
舟山市	2006	1.17111	1.18056	34682	45.89	1782	0.0598154
舟山市	2007	1.27619	1.18056	42259	45.26	1045	0.363053
舟山市	2008	1.39978	1.31944	50683	43.78	1130	0.362366
舟山市	2009	1.429	1.25	55311	44.9	1034	0.393415
舟山市	2010	1.63744	1.73611	66581	44.85	1095	0.37854
舟山市	2011	1.80203	1.45833	79765	44.98	1149	0.355728
舟山市	2012	1.91256	2.33677	87883	45.38	1216	0.408743
舟山市	2013	2.00865	2.19931	95964	45.5	977	0.432132
舟山市	2014	1.74254	3.23024	88746	48.17	1023	0.440903
舟山市	2015	1.84579	3.23024	95113	48.7	997	0.466781
舟山市	2016	2.23895	3.2967	107463	48.7	1084	0.473623
舟山市	2017	2.80333	1.57437	104882	51.3739	1047	0.455394
舟山市	2018	2.98929	1.52296	112490	56.63	1058.23	0.515281
舟山市	2019	3.29772	1.93215	116781	54.64	1076.38	0.543841
金华市	2004	1.09008	0.403004	21703	37.02	1402	0.0401379
金华市	2005	1.05205	0.485437	23482	40.69	1406	0.0465427
金华市	2006	1.13621	0.466264	27108	40.58	1104	0.0453877
金华市	2007	1.21818	0.475276	32002	40.53	1484	0.297093
金华市	2008	1.39112	0.475276	36538	40.98	1487	0.32327
金华市	2009	1.55262	0.429577	34294	43.04	1512	0.350173
金华市	2010	1.78421	0.420437	39897	43.41	1533	0.357931
金华市	2011	1.91062	0.466094	45721	44.2	1554	0.33949
金华市	2012	2.02851	0.392981	50269	45.43	1567	0.384415
金华市	2013	2.15077	0.447816	62553	46.4	1609	0.410183
金华市	2014	2.28786	0.4862	59056	48.67	1656	0.417174
金华市	2015	2.35055	0.483367	62480	50.32	1720	0.472969
金华市	2016	2.73292	0.495796	67158	51.38	2047	0.494345
金华市	2017	2.9743	0.525315	69445	50.6403	1383	0.484485
金华市	2018	3.05997	0.498538	73428	54.12	1409.89	0.515598
金华市	2019	3.44173	0.602175	81224	56.6	1429.38	0.543713
绍兴市	2004	1.04091	0.423934	30254	33.1	1838	0.0419525
绍兴市	2005	1.05945	0.375484	33283	33.26	1849	0.0461564
绍兴市	2006	1.1302	0.411822	38540	33.65	3054	0.0488667
绍兴市	2007	1.24627	0.472384	45244	33.95	2966	0.228077
绍兴市	2008	1.42822	0.460271	50909	34.96	2978	0.278572
绍兴市	2009	1.43645	0.641957	54316	37.47	3139	0.328108
绍兴市	2010	1.60847	0.67641	63770	38.6	3120	0.341807
绍兴市	2011	1.77167	0.702519	75820	39.78	3176	0.37003
绍兴市	2012	1.87185	0.763081	82966	41.24	3449	0.36209
绍兴市	2013	1.86236	0.845513	89758	42.12	2823	0.400094
绍兴市	2014	1.80458	1.00193	86136	43.56	2919	0.43263
绍兴市	2015	1.86119	1.00362	90003	45.1	2935	0.469654
绍兴市	2016	2.00305	0.938882	96204	45.59	3023	0.477602
绍兴市	2017	2.18677	0.768813	101588	44.275	3092	0.513293
绍兴市	2018	2.40319	0.790434	107853	48.16	3043.22	0.582852
绍兴市	2019	2.59304	0.813504	114561	48.46	2237.13	0.811161
温州市	2004	1.05594	0.526137	18846	38.62	986	0.0383652
温州市	2005	1.09431	0.551595	21335	41.63	809	0.0413129
温州市	2006	1.1663	0.661914	24390	41.66	3485	0.0464652
温州市	2007	1.26675	0.58554	28387	42.63	3379	0.19282
温州市	2008	1.39008	0.577054	31555	43.76	3140	0.193764
温州市	2009	1.4789	0.576858	32588	44.82	3162	0.225244
温州市	2010	1.65493	0.568471	37359	44.37	2500	0.227997
温州市	2011	1.69994	0.687256	43132	45.34	2535	0.214139
温州市	2012	1.78263	0.867441	40103	46.39	2648	0.231771
温州市	2013	1.94605	0.891039	49614	46.78	2641	0.249542
温州市	2014	2.09214	0.839785	47118	50.09	2524	0.262681
温州市	2015	2.14827	0.820492	50790	53.4	2270	0.259742
温州市	2016	2.43313	0.751055	55779	56.17	2476	0.262869
温州市	2017	2.50998	0.912439	58854	51.9025	2437	0.29127
温州市	2018	2.90388	0.705202	65055	58.02	2609.92	0.303915
温州市	2019	3.03997	0.852931	71225	55.14	2704.94	0.356164
台州市	2004	1.07457	0.520667	21177	33.32	1261	0.0530161
台州市	2005	1.08722	0.605674	22438	39.22	1280	0.0456713
台州市	2006	1.19813	0.637552	26026	39.3	2046	0.0439484
台州市	2007	1.31511	0.658804	30366	39.55	1521	0.187915
台州市	2008	1.43845	0.626926	34374	40.41	1457	0.206939
台州市	2009	1.53004	0.648178	35489	41.68	1347	0.225019
台州市	2010	1.78952	0.690681	41172	41.69	1348	0.237338
台州市	2011	1.8178	0.733185	46011	42.64	1348	0.204846
台州市	2012	1.9217	1.02008	48505	44.34	1350	0.27113
台州市	2013	1.97975	0.977579	53086	45.17	1354	0.279999
台州市	2014	1.98508	0.975879	56208	47.02	1364	0.289602
台州市	2015	1.98675	0.943789	58917	49.42	1378	0.470045
台州市	2016	2.33228	0.830836	64287	49.98	1379	0.295625
台州市	2017	2.57663	0.721071	71950	44.7536	1400	0.312694
台州市	2018	2.82303	0.615522	79541	49.8	1400.28	0.348007
台州市	2019	3.08261	0.652239	83555	48.93	1433.73	0.56073
丽水市	2004	1.05594	0.144525	10582	37.57	1005	0.101335
丽水市	2005	1.09427	0.144525	12189	40.85	1058	0.10556
丽水市	2006	1.16771	0.150306	14104	41.31	1261	0.116526
丽水市	2007	1.28425	0.144525	17133	41.85	1277	0.378829
丽水市	2008	1.44989	0.150306	22053	40.46	1322	0.382439
丽水市	2009	1.49646	0.150306	23717	41.49	1175	0.385803
丽水市	2010	1.78422	0.150306	31296	40.97	1219	0.369037
丽水市	2011	1.90773	0.156087	37706	40.57	1225	0.373658
丽水市	2012	2.03208	0.17343	42244	40.85	1255	0.396151
丽水市	2013	2.17397	0.190663	37238	40.75	1281	0.388973
丽水市	2014	2.29865	0.20222	49459	43.51	1293	0.438031
丽水市	2015	2.34073	0.221991	51676	46.05	1296	0.493867
丽水市	2016	2.58602	0.201295	56238	47.2	1323	0.525184
丽水市	2017	2.65161	0.195601	57500	46.1745	1341	0.580908
丽水市	2018	2.82913	0.178408	63611	51.82	1397.81	0.668211
丽水市	2019	2.98902	0.165326	66936	54.52	1453.8	0.773886
衢州市	2004	1.05594	0.169664	11570	34.69	1389	0.0357697
衢州市	2005	1.09436	0.192286	13401	38.75	1288	0.0359454
衢州市	2006	1.16772	0.180975	15740	37.49	1601	0.0418947
衢州市	2007	1.27094	0.192286	21598	35.93	1501	0.281421
衢州市	2008	1.39966	0.192286	23362	34.56	1531	0.298991
衢州市	2009	1.45473	0.180975	25127	37.69	1460	0.347937
衢州市	2010	1.62311	0.214908	30153	36.58	1507	0.363476
衢州市	2011	1.78629	0.260034	36508	36.15	1572	0.35245
衢州市	2012	1.87998	0.293951	38476	38.69	1576	0.376489
衢州市	2013	1.99321	0.293951	41597	39.52	1672	0.467692
衢州市	2014	2.08841	0.296099	43740	42.47	1775	0.525129
衢州市	2015	2.14327	0.287507	53847	45.97	1790	0.592619
衢州市	2016	2.29724	0.256303	58281	47.84	1794	0.605982
衢州市	2017	2.43568	0.24398	61250	44.6653	1808	0.679892
衢州市	2018	2.61309	0.257999	66936	49.5	1782.61	0.753443
衢州市	2019	2.76304	0.325382	71087	53.11	1807.1	0.978215
宁波市	2004	1.14062	1.05713	39174	37.27	1038	0.0293785
宁波市	2005	1.18926	1.03577	44156	39.83	1053	0.0390967
宁波市	2006	1.11053	1.14255	51460	40.06	2701	0.0408149
宁波市	2007	1.22288	1.10024	66067	40.31	2044	0.4439
宁波市	2008	1.34013	1.16125	69997	40.36	2085	0.391277
宁波市	2009	1.38335	1.2733	60720	41.2	2098	0.391929
宁波市	2010	1.53689	1.35493	69368	40.15	2115	0.428927
宁波市	2011	1.69571	1.76243	79524	40.51	2192	0.464631
宁波市	2012	1.79494	1.91524	86228	42.49	2256	0.492352
宁波市	2013	1.9476	1.97637	122912	43.64	2342	0.527094
宁波市	2014	1.99501	2.03749	98362	44.07	2395	0.562676
宁波市	2015	2.0871	2.02537	102374	45.24	2444	0.591098
宁波市	2016	2.33598	1.9944	110656	45.23	2594	0.651848
宁波市	2017	2.53841	1.95059	123955	41.1039	3034	0.597314
宁波市	2018	2.84299	2.5111	132603	45.9	3359.25	0.728351
宁波市	2019	3.07535	2.6684	143157	49.06	2370.94	1.03593
宣城市	2004	1.11774	0.072792	8793	35.47	1899	0.0139608
宣城市	2005	1.18248	0.08088	9749	40.74	1904	0.0163002
宣城市	2006	1.1436	0.0811491	11202	41.02	1385	0.013582
宣城市	2007	1.29703	0.0811491	13077	41.86	1691	0.125388
宣城市	2008	1.45087	0.105494	15953	38.9	1898	0.199363
宣城市	2009	1.52457	0.113609	16774	38.42	2067	0.258613
宣城市	2010	1.74009	0.113609	20754	35.95	2088	0.43911
宣城市	2011	1.84609	0.081215	26360	32.68	2441	0.633274
宣城市	2012	1.95683	0.0963623	29636	33.1	2462	0.719131
宣城市	2013	2.12478	0.441661	30100	33.23	2485	0.808882
宣城市	2014	2.73222	0.18582	35726	35.75	2686	0.8378
宣城市	2015	2.89624	0.175343	37610	38.79	2695	0.791677
宣城市	2016	3.27692	0.166816	40740	40.47	2710	0.853686
宣城市	2017	3.58332	0.164542	45467	36.9047	2718	0.945165
宣城市	2018	3.72339	0.0553886	50065	41.01	2714.58	1.05866
宣城市	2019	4.40843	0.125721	58819	43.12	2729	1.00559
宿州市	2004	1.12133	0.357617	4096	30.73	3999	0.0149398
宿州市	2005	1.09976	0.367835	5453	35.5	4070	0.0157838
宿州市	2006	1.05501	0.357617	6276	35.13	2721	0.0242333
宿州市	2007	1.11493	0.326964	7430	37.43	2676	0.0653358
宿州市	2008	1.11282	0.316747	8982	36.89	2764	0.0887297
宿州市	2009	1.10587	0.296311	8526	36.51	2768	0.0928413
宿州市	2010	1.25064	0.337182	9945	34.23	2827	0.10125
宿州市	2011	1.41521	0.3474	14971	32.3	2870	0.128348
宿州市	2012	1.49645	0.398488	17308	32.64	3019	0.126826
宿州市	2013	1.55382	0.572188	15800	33.24	3165	0.134562
宿州市	2014	1.66714	0.604588	20895	35.29	3224	0.196716
宿州市	2015	1.55416	1.20736	22415	40.35	3572	0.181765
宿州市	2016	1.65916	1.30798	24270	42.82	3484	0.462135
宿州市	2017	1.77246	0.844351	26056	41.0809	3546	0.268901
宿州市	2018	2.32085	0.380722	28757	47.6	3517.11	0.281796
宿州市	2019	2.86924	0.516149	34773	49.57	3573.04	0.176599
滁州市	2004	0.968806	0.0813429	7425	34.05	979	0.0235632
滁州市	2005	0.855025	0.110922	7550	34.56	1033	0.0261522
滁州市	2006	0.85489	0.110922	8503	35.02	1058	0.0325015
滁州市	2007	0.90514	0.103527	10611	34.72	1079	0.103799
滁州市	2008	1.02268	0.118317	11626	33.42	1062	0.129895
滁州市	2009	1.07084	0.133107	14002	31.17	1126	0.129125
滁州市	2010	1.23312	0.140501	17400	29.5	1153	0.191059
滁州市	2011	1.39895	0.214449	21634	27.93	1251	0.204847
滁州市	2012	1.47736	0.229239	24651	27.85	1297	0.326431
滁州市	2013	1.54104	0.310743	24190	27.84	1358	0.319985
滁州市	2014	1.63818	0.347218	30562	28.75	1429	0.384429
滁州市	2015	1.69124	0.331977	32634	29.81	1456	0.476757
滁州市	2016	1.86183	0.339819	35301	34.44	1587	0.544501
滁州市	2017	2.11742	0.290175	39517	31.1747	1785	0.657664
滁州市	2018	2.39476	0.320657	43999	36.13	1796.18	0.605978
滁州市	2019	3.45475	0.29232	70429	42.35	1966.38	0.482925
池州市	2004	1.10027	0.12089	7102	34.18	766	0.00854744
池州市	2005	1.14406	0.0967118	8719	39.86	787	0.00698856
池州市	2006	1.2017	0.0967118	10007	40	794	0.00876316
池州市	2007	1.32356	0.0846228	10949	40.98	889	0.0874
池州市	2008	1.50607	0.0846331	14147	38.8	901	0.136642
池州市	2009	1.63472	0.145068	17295	40.85	987	0.228186
池州市	2010	1.85287	0.157157	21437	38.2	1089	0.339578
池州市	2011	2.10092	0.169246	26345	35.34	1125	0.272492
池州市	2012	2.23761	0.157157	29471	36.19	1198	0.338582
池州市	2013	2.21825	0.241779	28534	36.62	1199	0.386959
池州市	2014	2.3598	0.27043	36267	39.6	1199	0.330163
池州市	2015	2.46815	0.264198	38014	40.91	1199	0.350112
池州市	2016	2.77397	0.252887	40919	44.15	1204	0.303063
池州市	2017	3.16073	0.244077	43178	41.4819	1224	0.204885
池州市	2018	3.32359	0.230027	46865	46.77	1226.03	0.3768
池州市	2019	4.00425	0.270866	56217	45.73	1227.22	0.293281
阜阳市	2004	1.10027	0.214834	2559	33.67	4135	0.0318244
阜阳市	2005	1.12758	0.235294	3761	38.37	4329	0.0322233
阜阳市	2006	1.26702	0.230187	4009	37.35	2033	0.0267999
阜阳市	2007	1.31846	0.225064	5515	36.84	2115	0.0658281
阜阳市	2008	1.49237	0.225064	6475	36.02	2159	0.0672677
阜阳市	2009	1.55629	0.184143	7288	35.3	2193	0.066387
阜阳市	2010	1.71234	0.184143	9068	33.49	2221	0.0812259
阜阳市	2011	1.92355	0.204583	11202	32.64	2257	0.153928
阜阳市	2012	2.05377	0.245499	12616	32.79	2286	0.195564
阜阳市	2013	2.24515	0.276187	10090	33.25	2318	0.179091
阜阳市	2014	2.35962	0.297565	15303	34.26	2243	0.142367
阜阳市	2015	2.43897	0.279205	16121	36.67	2290	0.306537
阜阳市	2016	2.63702	0.261712	17642	38.65	2353	0.354686
阜阳市	2017	2.88337	0.244317	19536	35.0431	2502	0.345728
阜阳市	2018	3.09034	0.230777	21589	40.44	2677.72	0.28485
阜阳市	2019	4.07366	0.347994	32855	48.85	3024.46	0.267238
六安市	2004	1.10027	0.111259	3765	33.72	775	0.0339787
六安市	2005	1.14374	0.111259	5094	39.86	785	0.0272681
六安市	2006	1.19999	0.111259	5824	40.03	2446	0.0277817
六安市	2007	1.51532	0.105696	7216	39.02	2579	0.0650601
六安市	2008	1.4313	0.105696	7473	37.22	2976	0.0741834
六安市	2009	1.52728	0.116822	9637	35.6	3989	0.276753
六安市	2010	1.69039	0.116822	12047	34.18	4356	0.125495
六安市	2011	1.84216	0.389408	14586	32.49	3786	0.172615
六安市	2012	1.93048	0.389408	16248	32.24	3455	0.265574
六安市	2013	2.08818	0.394204	14089	32.39	3540	0.26244
六安市	2014	2.67393	0.184249	19211	32.89	3570	0.287678
六安市	2015	2.22089	0.69531	21524	36.17	3600	0.32021
六安市	2016	2.56874	0.803896	23298	37.39	3630	0.411164
六安市	2017	2.78786	0.779235	24406	37.6056	3636	0.798185
六安市	2018	3.14829	0.854314	26731	44.12	3656.99	0.833164
六安市	2019	4.03544	0.860786	33370	50.47	3658.2	0.711117
合肥市	2004	1.10027	2.61773	13378	40.44	2744	0.0218077
合肥市	2005	1.19005	2.57505	18960	49.02	2941	0.0214745
合肥市	2006	1.28034	2.64618	23203	46.71	8600	0.021895
合肥市	2007	1.52993	2.78845	28134	45.24	8923	0.170087
合肥市	2008	2.10908	3.10771	34482	43.53	3898	0.288845
合肥市	2009	2.29591	3.30637	41543	42.26	4082	0.419072
合肥市	2010	2.49264	3.68951	54796	41.17	4377	0.664926
合肥市	2011	2.43567	2.67717	48563	39.22	4141	0.523423
合肥市	2012	2.51547	3.13674	55186	39.17	5338	0.544432
合肥市	2013	2.59441	2.57754	65631	39.42	4256	0.556752
合肥市	2014	2.74961	3.28248	67689	39.88	4592	0.560806
合肥市	2015	2.99467	3.30747	73102	42.75	3357	0.658389
合肥市	2016	3.32393	3.45408	80138	44.99	3553	1.62087
合肥市	2017	3.65365	3.45277	88456	42.1535	3514	0.99374
合肥市	2018	3.82093	4.01747	97470	50.28	3810.01	1.1757
合肥市	2019	4.75966	4.62473	115623	60.6	3893.01	1.38508
蚌埠市	2004	1.10027	1.00806	7621	33.81	3153	0.0170674
蚌埠市	2005	1.14398	0.991263	9465	39.84	3246	0.013362
蚌埠市	2006	1.20325	0.873656	10231	39.7	2952	0.0166843
蚌埠市	2007	1.31235	0.924059	12818	40.75	3054	0.0852822
蚌埠市	2008	1.46722	0.991263	13632	39.8	3066	0.41167
蚌埠市	2009	1.56656	0.974462	14803	35.94	3099	0.446619
蚌埠市	2010	1.77214	1.00993	17621	33.91	3054	0.543785
蚌埠市	2011	1.99984	1.10887	24574	32.17	3092	0.5779
蚌埠市	2012	2.08676	0.840054	27999	32.16	3125	0.63771
蚌埠市	2013	2.24558	1.15927	27462	31.73	2516	0.718199
蚌埠市	2014	2.38978	1.18434	35542	32.6	2544	0.662312
蚌埠市	2015	2.52955	1.00454	38267	36.99	2599	0.895436
蚌埠市	2016	2.81075	0.99832	41855	41.61	2618	0.965665
蚌埠市	2017	3.17637	0.929256	46233	38.7267	2624	0.818032
蚌埠市	2018	3.46401	0.891783	50662	43.42	2629.69	0.620731
蚌埠市	2019	4.1574	0.673332	60469	47.5	2643.37	0.808158
淮南市	2004	1.10027	0.812379	9225	35.49	985	0.00484871
淮南市	2005	1.14365	0.928433	11232	35.63	990	0.00660091
淮南市	2006	1.19442	0.928433	12876	34.86	999	0.00550856
淮南市	2007	1.30983	0.928433	15699	35.35	935	0.119804
淮南市	2008	1.49176	0.928433	19809	30.21	942	0.144967
淮南市	2009	1.56831	1.04449	22169	29	958	0.185761
淮南市	2010	1.75099	1.31528	26049	27.8	2536	0.210091
淮南市	2011	1.96066	1.35449	30400	27.09	2559	0.282945
淮南市	2012	2.0891	1.47059	33489	28.16	2561	0.375196
淮南市	2013	2.24869	1.74149	33720	29.87	2546	0.401689
淮南市	2014	2.36732	1.64667	33361	33.78	2183	0.295812
淮南市	2015	2.50923	1.57237	26398	39.53	2213	0.259299
淮南市	2016	2.76566	0.662509	27990	40.55	2247	0.302986
淮南市	2017	3.02661	0.704447	30540	38.5889	2318	0.334283
淮南市	2018	3.32022	0.73355	32487	42.63	2512.05	0.362259
淮南市	2019	3.95174	0.610629	37140	49.27	2555.11	0.387901
铜陵市	2004	1.10027	1.25786	19183	31.84	1747	0.034962
铜陵市	2005	1.14402	1.16801	25309	34.77	1881	0.0361439
铜陵市	2006	1.205	1.25786	33526	30.14	1905	0.0398555
铜陵市	2007	1.31998	1.25786	40116	29.6	2294	0.161276
铜陵市	2008	1.46201	1.25786	44100	30.3	2314	0.180628
铜陵市	2009	1.55406	1.07817	46765	29.51	2333	0.248654
铜陵市	2010	1.77163	1.16801	64496	25.19	2299	0.25721
铜陵市	2011	2.02114	1.25786	79704	23.36	2295	0.309591
铜陵市	2012	2.11376	1.25	84819	24.66	2411	0.70515
铜陵市	2013	2.19683	1.41549	91973	26.1	2416	0.713356
铜陵市	2014	2.31354	1.34221	97193	26.98	2404	1.03201
铜陵市	2015	2.43936	1.73106	57387	33.07	2632	0.853664
铜陵市	2016	2.62435	0.699766	59960	35.38	2513	0.868265
铜陵市	2017	2.86852	0.703444	69935	31.2109	2504	0.743597
铜陵市	2018	3.09146	0.551655	75524	37.66	2603.6	0.497857
铜陵市	2019	3.28968	0.84258	58726	48.19	2586.09	0.986083
马鞍山市	2004	1.10027	1.66074	21337	23.87	3192	0.0128256
马鞍山市	2005	1.16075	1.54211	29704	30.51	3249	0.00918281
马鞍山市	2006	1.22118	1.60142	34010	31.42	4571	0.0143856
马鞍山市	2007	1.34757	1.60142	41917	30.31	5111	0.195659
马鞍山市	2008	1.51066	1.60142	49824	28.18	5064	0.1832
马鞍山市	2009	1.60531	1.66074	51879	29.61	5309	0.278574
马鞍山市	2010	1.83026	1.54211	62942	27	5359	0.301597
马鞍山市	2011	2.07413	0.717467	52000	26.07	3564	0.305511
马鞍山市	2012	2.18566	1.13608	56217	27.73	3707	0.409976
马鞍山市	2013	2.16142	1.28427	56702	29.34	3809	0.471015
马鞍山市	2014	2.27578	1.13855	60091	31.88	4017	0.431191
马鞍山市	2015	2.33412	1.08619	60802	37.52	4105	0.486712
马鞍山市	2016	2.59924	1.1141	65833	38.99	4205	0.689628
马鞍山市	2017	2.9512	1.08224	74709	34.592	4224	0.719553
马鞍山市	2018	3.00747	0.925908	82695	41.88	4279.46	0.605479
马鞍山市	2019	3.53347	1.25512	89867	46.59	4327.8	0.515386
淮北市	2004	1.10027	0.36483	8183	30.76	2330	0.0151954
淮北市	2005	1.14372	0.36483	10245	32.84	2448	0.0192354
淮北市	2006	1.19696	0.36483	11015	35.11	5765	0.0147294
淮北市	2007	1.29901	0.36483	12674	33.72	5896	0.0863457
淮北市	2008	1.47687	0.36483	17029	30.16	5951	0.0922685
淮北市	2009	1.55999	0.36483	18096	29.02	3963	0.179954
淮北市	2010	1.78319	0.401313	22309	26.61	4025	0.179959
淮北市	2011	2.02244	1.05801	26239	25.21	3919	0.209906
淮北市	2012	2.13064	0.437796	29278	25.58	4036	0.237664
淮北市	2013	2.20831	0.729661	32729	25.13	3937	0.190517
淮北市	2014	2.37417	0.622036	35324	28.95	3930	0.219223
淮北市	2015	2.54637	0.607807	35057	34.1	3883	0.17687
淮北市	2016	2.78509	0.485224	36427	35.95	3550	0.120721
淮北市	2017	3.06244	0.479387	41660	34.1873	3580	0.171676
淮北市	2018	3.36883	1.28749	43962	38.56	3630.95	0.106893
淮北市	2019	3.98388	0.673112	47654	50.51	3554.29	0.0771336
芜湖市	2004	1.10027	0.693398	15392	33.31	3078	0.0068391
芜湖市	2005	1.14395	0.723545	17750	39.3	3165	0.0414327
芜湖市	2006	1.20513	0.753693	21045	37.31	2225	0.0443801
芜湖市	2007	1.31695	0.723545	25933	37.21	4190	0.322342
芜湖市	2008	1.5048	0.844136	32500	34.13	4212	0.436686
芜湖市	2009	1.62756	0.934579	39142	32.72	4864	0.805211
芜湖市	2010	1.8599	1.53753	48306	30.38	5152	0.902875
芜湖市	2011	2.55837	1.1189	43095	27.66	1641	0.880046
芜湖市	2012	2.60551	1.1356	48742	27.85	1594	1.08754
芜湖市	2013	2.39693	0.935204	54533	27.75	1616	1.25423
芜湖市	2014	2.77196	1.30568	64039	30.98	1782	1.48458
芜湖市	2015	2.81339	1.20312	67592	37.92	1909	1.4541
芜湖市	2016	3.14288	1.0224	73715	39.3	1882	1.91833
芜湖市	2017	3.40908	0.964155	80458	36.9126	2040	1.93757
芜湖市	2018	3.53227	0.936276	88085	43.77	2129.28	1.82459
芜湖市	2019	4.23843	1.28698	96154	47.4	2266.32	1.4138
安庆市	2004	1.10027	0.194805	6483	30.78	928	0.0176522
安庆市	2005	1.09417	0.233797	7595	38.09	1247	0.0158039
安庆市	2006	1.17044	0.240291	8709	38.63	1899	0.0218531
安庆市	2007	1.24669	0.215433	10485	39.51	1935	0.0580777
安庆市	2008	1.41373	0.221961	12595	38.52	1920	0.140368
安庆市	2009	1.48174	0.306829	13811	34.59	1924	0.219215
安庆市	2010	1.72294	0.33947	18604	31.23	1913	0.251136
安庆市	2011	1.969	0.280715	22893	29.8	2078	0.285579
安庆市	2012	2.0867	0.280715	25592	29.72	2083	0.331536
安庆市	2013	2.10629	0.293772	22801	32.61	2086	0.393688
安庆市	2014	2.23177	0.344046	28808	33.49	2105	0.400837
安庆市	2015	2.25153	0.302104	31101	36.53	2271	0.506113
安庆市	2016	2.4936	0.309573	33294	39.97	2277	0.514473
安庆市	2017	2.76791	0.297645	36928	35.7935	2293	0.560717
安庆市	2018	3.14719	0.298789	41088	39.7	2027.29	0.549102
安庆市	2019	3.84943	0.399985	50574	45.98	2076.08	0.47693
黄山市	2004	1.08682	0.132558	9001	45.3	183	0.0272769
黄山市	2005	1.13002	0.132558	10909	47.7	186	0.0325669
黄山市	2006	1.22435	0.132558	12733	47.04	547	0.033762
黄山市	2007	1.37426	0.142755	14430	48.3	556	0.200768
黄山市	2008	1.53851	0.142755	16867	46.86	580	0.29976
黄山市	2009	1.63808	0.152952	17977	46.04	585	0.365091
黄山市	2010	1.87866	0.163149	20846	43.2	672	0.454998
黄山市	2011	2.07603	0.163149	25582	41.99	724	0.559376
黄山市	2012	2.35842	0.173346	28773	42.33	756	0.679641
黄山市	2013	2.45183	0.183542	31993	42.66	786	0.675701
黄山市	2014	2.63339	0.170287	37306	43.06	794	0.705425
黄山市	2015	2.71566	0.173073	38794	49.73	833	0.69499
黄山市	2016	2.92126	0.184439	41905	51.35	835	0.689196
黄山市	2017	3.15523	0.16646	44251	49.0018	876	0.885003
黄山市	2018	3.38601	0.137735	48579	56.71	879.385	0.863531
黄山市	2019	3.96256	0.267514	57853	57.82	890.212	0.743227
亳州市	2004	1.10027	0.107476	4299	33.9	3027	0.0101494
亳州市	2005	1.13207	0.0955338	5091	38.2	3130	0.00837736
亳州市	2006	1.02823	0.107476	5835	40.19	5406	0.0101095
亳州市	2007	1.39511	0.214951	6718	41.14	4276	0.0409755
亳州市	2008	1.69844	0.167184	7918	40.23	4105	0.0311959
亳州市	2009	1.41284	0.143301	8477	37.51	4406	0.0419745
亳州市	2010	1.57932	0.131359	10318	35.9	3836	0.069289
亳州市	2011	1.73194	0.179126	12868	34.18	4017	0.138258
亳州市	2012	1.84741	0.238834	14642	34.33	3692	0.13111
亳州市	2013	1.94041	0.226893	12498	34.89	4062	0.191241
亳州市	2014	2.02344	0.314048	17769	38.53	4155	0.163168
亳州市	2015	2.09416	0.309236	18771	40.04	3693	0.302607
亳州市	2016	2.34721	0.30372	20611	41.57	3936	0.25551
亳州市	2017	2.51671	0.294684	22385	39.1694	4051	0.46665
亳州市	2018	2.80844	0.281305	24547	44.63	4200.23	0.408466
亳州市	2019	3.76578	0.14963	33314	50.83	4263.52	0.3308
福州市	2004	0.88069	1.34525	23444	38.5	1638	0.0270463
福州市	2005	0.87467	1.4121	22301	41.16	1398	0.0258075
福州市	2006	0.917265	1.50401	24874	42.73	2122	0.0294162
福州市	2007	1.0385	1.49327	29515	43.17	2218	0.120208
福州市	2008	1.15062	1.55591	33615	42.26	1889	0.126274
福州市	2009	1.32063	1.8751	38015	48.15	1942	0.127179
福州市	2010	1.38029	2.34196	44667	46.06	1967	0.133697
福州市	2011	1.44232	2.38788	52152	45.5	2097	0.131879
福州市	2012	1.54706	2.77055	58304	45.84	2155	0.153569
福州市	2013	1.71832	2.94658	71427	45.8	2206	0.184371
福州市	2014	1.79265	3.1461	69995	46.45	2264	0.180451
福州市	2015	1.93595	3.38564	75259	48.66	2322	0.178983
福州市	2016	2.19146	3.37538	82251	50.26	2390	0.181458
福州市	2017	2.3279	2.62362	92144	46.095	2304	0.280004
福州市	2018	2.47997	2.81469	102037	52.91	3964.17	0.37008
福州市	2019	2.83052	3.08144	120879	53.61	4131.06	0.306551
三明市	2004	0.889415	0.095823	14307	32.7	195	0.0351743
三明市	2005	0.894531	0.0914674	14909	36.81	196	0.0389977
三明市	2006	0.930525	0.0911933	17181	35.78	1286	0.0470705
三明市	2007	1.02317	0.0997355	20749	34.93	1132	0.13625
三明市	2008	1.10488	0.0997355	25407	31.39	1134	0.125262
三明市	2009	1.16694	0.099593	30370	36.06	996	0.158789
三明市	2010	1.27971	0.099593	37917	33.5	1043	0.130161
三明市	2011	1.41213	0.099593	48376	33.47	1054	0.133766
三明市	2012	1.49791	0.108253	53422	33.3	1051	0.189011
三明市	2013	1.6291	0.130634	53151	32.13	1035	0.229503
三明市	2014	1.67052	0.129501	64590	32.41	1021	0.243843
三明市	2015	1.74908	0.125757	67978	34.2	1011	0.260098
三明市	2016	1.98601	0.126478	73261	35.09	1010	0.237858
三明市	2017	2.2887	0.129458	82333.5	32.2205	1010	0.218354
三明市	2018	2.50793	0.110081	91406	35.77	1096.36	0.146606
三明市	2019	2.78419	0.140867	100641	34.42	1125.91	0.123317
南平市	2004	0.874652	0.136986	11209	39.39	1380	0.0246817
南平市	2005	0.882546	0.148402	12083	38.67	1376	0.0340516
南平市	2006	0.918947	0.148396	13652	38.86	594	0.0338262
南平市	2007	1.01051	0.140786	16201	38.13	561	0.131404
南平市	2008	1.08164	0.136804	19348	36.77	1227	0.128733
南平市	2009	1.15051	0.136804	21473	37.83	1217	0.139724
南平市	2010	1.26502	0.133039	26279	36.28	1242	0.138255
南平市	2011	1.39216	0.133039	33775	34.05	1235	0.144503
南平市	2012	1.49331	0.152045	37756	33.67	1262	0.146665
南平市	2013	1.68265	0.163623	34994	33.25	1262	0.155197
南平市	2014	1.79643	0.169254	47044	33.86	1273	0.155554
南平市	2015	1.82074	0.158828	50932	35.25	1769	0.143828
南平市	2016	2.05067	0.155061	55009	35.75	1770	0.124158
南平市	2017	2.19975	0.141438	60884.5	33.3442	1009	0.190779
南平市	2018	2.37531	0.104186	66760	40.48	1034.46	0.206174
南平市	2019	2.69399	0.128425	74036	42.41	1090.16	0.170075
宁德市	2004	1.42596	0.148677	10166	38.52	1669	0.0330377
宁德市	2005	1.38146	0.163544	11266	40.94	1802	0.0399011
宁德市	2006	0.526575	0.173506	12611	40.73	1693	0.0416928
宁德市	2007	0.549084	0.203681	14999	41.67	2047	0.0862378
宁德市	2008	0.581473	0.196256	17851	39.76	2065	0.0771369
宁德市	2009	0.63134	0.181159	20174	41.37	2093	0.0989902
宁德市	2010	0.729972	0.178412	25200	38.56	2191	0.129324
宁德市	2011	0.78445	0.166063	32936	35.02	2208	0.0752916
宁德市	2012	0.799936	0.156111	38015	33.48	2255	0.111169
宁德市	2013	0.866506	0.19328	35698	31.28	2329	0.140395
宁德市	2014	0.954188	0.191719	48369	31.41	2353	0.0942014
宁德市	2015	1.05101	0.207924	52006	31.89	2379	0.0909733
宁德市	2016	1.16617	0.181626	56358	32.68	2391	0.112204
宁德市	2017	1.09215	0.17122	61618	31.6796	2541	0.144462
宁德市	2018	1.30507	0.139061	66878	34.94	2625.12	0.35016
宁德市	2019	1.54486	0.137125	84251	35.99	3074.42	0.418201
莆田市	2004	0.874652	0.318706	11112	34.61	2853	0.0312174
莆田市	2005	0.869772	0.343221	12854	32.37	2918	0.0311468
莆田市	2006	0.847927	0.339888	15051	31.32	2163	0.0292673
莆田市	2007	0.935692	0.364166	18113	32.32	2162	0.110533
莆田市	2008	1.02075	0.388444	21515	31.15	2151	0.101383
莆田市	2009	1.13188	0.388444	24260	34.68	2152	0.133378
莆田市	2010	1.25721	0.364166	30161	33.56	2164	0.143874
莆田市	2011	1.39449	0.387315	37724	32.22	2164	0.137986
莆田市	2012	1.55199	0.387315	42957	32.87	2287	0.15657
莆田市	2013	1.79653	0.43573	40205	35.03	2287	0.19378
莆田市	2014	1.85575	0.549988	52890	34.98	2287	0.233218
莆田市	2015	1.75869	0.621399	57873	35.69	2570	0.166165
莆田市	2016	1.92811	0.603002	63313	36.98	2689	0.135481
莆田市	2017	2.18793	0.620673	70319	34.2662	3037	0.155235
莆田市	2018	2.35944	0.513919	77325	42.2	3159.84	0.143618
莆田市	2019	2.85949	0.482934	89342	42.15	3244.96	0.0934875
泉州市	2004	1.00337	0.239278	21260	40.5	1182	0.0192517
泉州市	2005	0.899918	0.220872	21427	36.21	1203	0.0266678
泉州市	2006	0.897625	0.190649	24847	36.23	1544	0.0260317
泉州市	2007	0.908131	0.208806	29601	36.24	1488	0.129211
泉州市	2008	1.00201	0.199728	34840	36.2	1490	0.125517
泉州市	2009	1.0753	0.208806	39227	38.25	1499	0.120544
泉州市	2010	1.04006	0.208806	44563	36.13	1514	0.132531
泉州市	2011	1.06245	0.254199	52245	34.11	2079	0.157843
泉州市	2012	1.15529	0.254199	57291	34.39	2172	0.156598
泉州市	2013	1.26882	0.326827	74119	34.88	2267	0.17684
泉州市	2014	1.32743	0.324103	68254	35.02	2361	0.184435
泉州市	2015	1.46195	0.323922	72421	37.14	2410	0.201679
泉州市	2016	1.59518	0.308852	77784	38.54	2494	0.199197
泉州市	2017	1.83551	0.350613	87699	34.863	2523	0.19724
泉州市	2018	1.96859	0.417249	97614	39.93	2532.47	0.173466
泉州市	2019	2.30251	0.462369	114067	38.93	2533.58	0.158189
漳州市	2004	0.874659	0.21415	15394	38.32	1039	0.0130053
漳州市	2005	0.76169	0.21415	13402	34.76	1044	0.0175011
漳州市	2006	0.777957	0.222081	15221	34.13	3840	0.0189005
漳州市	2007	0.807172	0.21751	18072	35.02	4449	0.0960449
漳州市	2008	0.868221	0.21751	21073	34.18	4450	0.127443
漳州市	2009	0.955256	0.225278	24619	37.3	4453	0.12567
漳州市	2010	1.05958	0.21751	29769	36.62	4478	0.12591
漳州市	2011	1.07812	0.217374	36641	36.12	4524	0.145787
漳州市	2012	1.15927	0.322484	41433	36.16	4619	0.153108
漳州市	2013	1.23156	0.398279	45726	35.72	4750	0.179068
漳州市	2014	1.23715	0.405745	50685	36.24	5029	0.175769
漳州市	2015	1.32562	0.409627	55570	38.06	5289	0.161362
漳州市	2016	1.55558	0.423212	62196	39.95	5408	0.143984
漳州市	2017	1.73009	0.376862	69649	36.4059	5584	0.216918
漳州市	2018	1.8636	0.281657	77102	41.08	5920.95	0.126438
漳州市	2019	2.27946	0.244413	92075	41.03	5791.72	0.116225
龙岩市	2004	0.874652	0.146982	12792	34.17	1513	0.0336172
龙岩市	2005	0.882427	0.167979	14105	34.06	1522	0.0383012
龙岩市	2006	0.918438	0.152231	16394	33.05	1561	0.0360883
龙岩市	2007	1.01489	0.16273	20088	32.1	1551	0.105631
龙岩市	2008	1.11963	0.17311	24334	31.25	1565	0.147656
龙岩市	2009	1.21487	0.162619	29725	35.87	1572	0.16663
龙岩市	2010	1.39544	0.178356	38698	33.74	1618	0.149824
龙岩市	2011	1.50847	0.178459	48554	31.15	1636	0.150859
龙岩市	2012	1.65229	0.183939	53590	31.16	1657	0.194602
龙岩市	2013	1.7974	0.204585	48842	34.19	1683	0.23682
龙岩市	2014	1.9547	0.222263	62716	34.37	1762	0.297124
龙岩市	2015	2.03932	0.205529	66863	35.84	2089	0.332974
龙岩市	2016	2.25657	0.193674	72354	37.2	2096	0.294134
龙岩市	2017	2.47238	0.186697	81504.5	34.0564	2215	0.393657
龙岩市	2018	2.6061	0.184043	90655	41.86	2281.5	0.375253
龙岩市	2019	2.97574	0.140219	101476	43.77	2386.5	0.499739
厦门市	2004	0.874652	2.86807	40146	38.42	582	0.0579704
厦门市	2005	0.882634	2.99554	44737	43.05	615	0.0509844
厦门市	2006	0.946919	3.63289	50130	44.53	10875	0.0508124
厦门市	2007	0.982595	3.17864	56188	45.57	9495	0.468011
厦门市	2008	1.07782	3.68722	62651	46.18	11133	0.534416
厦门市	2009	1.12178	3.30579	68938	51.56	11317	0.483251
厦门市	2010	1.21003	3.43293	58337	49.15	12042	0.465852
厦门市	2011	1.30664	4.64081	70832	47.95	10678	0.48002
厦门市	2012	1.43375	5.34011	77392	50.33	10325	0.490329
厦门市	2013	1.58795	9.28163	153206	51.6	10046	0.54255
厦门市	2014	1.52747	11.6917	86832	54.67	9735	0.531156
厦门市	2015	1.69698	10.7092	90379	55.71	9685	0.535956
厦门市	2016	1.96139	11.8893	97282	58.57	9268	0.561993
厦门市	2017	2.25019	12.9336	107648	52.4277	9975	0.553626
厦门市	2018	2.42198	12.682	118015	58.16	8985.83	0.595981
厦门市	2019	3.03468	11.5556	142739	57.96	8437.06	0.641088
南昌市	2004	1.10602	2.69107	17238	39.85	3302	0.0207927
南昌市	2005	1.15537	2.68846	22390	39.99	3476	0.0182296
南昌市	2006	1.26034	2.7425	26131	39.21	10476	0.0196723
南昌市	2007	1.42942	2.62091	30460	39.49	10095	0.145479
南昌市	2008	1.76271	1.95893	36105	38.49	10000	0.135276
南昌市	2009	1.57035	1.89138	39669	38.59	9953	0.178569
南昌市	2010	1.78362	1.99946	43769	41.25	9881	0.161733
南昌市	2011	1.91807	2.3237	53023	36.25	10040	0.138281
南昌市	2012	2.02426	2.0535	58715	38.65	10179	0.149261
南昌市	2013	2.05553	3.1478	65412	39.82	7449	0.162385
南昌市	2014	2.12827	3.17522	70373	40.57	7564	0.215501
南昌市	2015	2.20104	3.28641	75879	41.22	7536	0.205009
南昌市	2016	2.38858	3.51202	81598	42.85	7639	0.232843
南昌市	2017	2.60266	3.75804	88711.5	41.3601	7731	0.451378
南昌市	2018	2.96573	3.7298	95825	45.94	7868.49	0.519124
南昌市	2019	3.13734	4.55344	100415	48.78	6804.39	0.607166
景德镇市	2004	1.10602	0.608828	10842	37.58	2699	0.0258594
景德镇市	2005	1.15513	0.64688	12596	37.34	2749	0.0191094
景德镇市	2006	1.26762	0.64688	14582	36.64	2629	0.0192191
景德镇市	2007	1.3969	0.601132	16899	34.54	2810	0.0954739
景德镇市	2008	1.56426	0.608828	20646	32.1	2810	0.100753
景德镇市	2009	1.60608	0.627854	23174	32.53	2826	0.118643
景德镇市	2010	1.83224	0.627854	29155	30.97	2831	0.127454
景德镇市	2011	2.07461	0.64688	35421	29.08	2328	0.137114
景德镇市	2012	2.21331	0.627257	39151	32.71	2381	0.151691
景德镇市	2013	2.33675	0.703288	40981	34.03	2492	0.167841
景德镇市	2014	2.43802	0.716974	45438	34.42	2511	0.154305
景德镇市	2015	2.51702	0.722676	47216	35.91	2522	0.337683
景德镇市	2016	2.70894	0.78103	50989	37.1	2291	0.222342
景德镇市	2017	2.82925	0.759027	50856	44.4686	2660	0.469614
景德镇市	2018	3.06313	0.826112	50723	45.81	2697.23	0.31499
景德镇市	2019	3.44296	0.109084	55228	49.16	2491.69	0.501587
萍乡市	2004	1.10602	0.339692	9409	29.37	3529	0.0361622
萍乡市	2005	1.15535	0.339692	12559	31	3554	0.0335381
萍乡市	2006	1.26453	0.287657	14544	30.47	3625	0.0360083
萍乡市	2007	1.40624	0.287657	17241	29.81	4084	0.071583
萍乡市	2008	1.61552	0.261506	21002	28.83	8510	0.0853377
萍乡市	2009	1.67273	0.261506	22685	29.62	8618	0.0803348
萍乡市	2010	1.87785	0.366109	28106	28.56	8798	0.16307
萍乡市	2011	2.13656	0.496862	35350	26.7	4438	0.184091
萍乡市	2012	2.28303	0.469851	39186	31.96	4757	0.213775
萍乡市	2013	2.29675	0.574263	41151	33.61	5155	0.305425
萍乡市	2014	2.37969	0.580266	45867	34.28	5232	0.346481
萍乡市	2015	2.49611	0.59645	48133	36.42	5258	0.419712
萍乡市	2016	2.63564	0.5278	52330	39.29	5408	0.449455
萍乡市	2017	2.95892	0.434873	52318.5	42.0971	5296	0.540899
萍乡市	2018	3.1983	0.397285	52307	47.61	5298.72	0.647024
萍乡市	2019	3.38775	0.457061	48007	48.18	5495.92	0.772247
九江市	2004	1.10602	0.302821	7728	34.87	824	0.0294594
九江市	2005	1.15509	0.36126	9231	33.11	846	0.0284904
九江市	2006	1.25829	0.382511	10783	32.63	7248	0.0286634
九江市	2007	1.38689	0.387823	12590	33.06	5700	0.07206
九江市	2008	1.57595	0.345322	14785	33.08	5274	0.0815731
九江市	2009	1.62092	0.36126	17420	35.88	5343	0.0725675
九江市	2010	1.83947	0.350635	21862	34.33	5485	0.0757317
九江市	2011	2.07012	0.308134	26464	32.85	6873	0.0939419
九江市	2012	2.19494	0.403761	29785	34.71	6195	0.116872
九江市	2013	2.3514	0.372156	31530	35.8	6237	0.238511
九江市	2014	2.42484	0.359943	37097	36.98	6286	0.266849
九江市	2015	2.48182	0.358016	39505	39.28	6055	0.272348
九江市	2016	2.7097	0.516315	43338	40.77	6211	0.280769
九江市	2017	2.88314	0.430338	49306	39.1384	4321	0.316459
九江市	2018	3.15522	0.39858	55274	42.52	4316.27	0.430156
九江市	2019	3.43459	0.351261	63584	44.83	1496.21	0.563595
新余市	2004	1.10602	0.377596	12112	31.46	2368	0.0295522
新余市	2005	1.155	0.377596	15935	31.84	2498	0.0318634
新余市	2006	1.26077	0.345803	19174	30.32	2841	0.0338357
新余市	2007	1.38792	0.345803	25013	28.09	2186	0.0993335
新余市	2008	1.59397	0.314367	35629	27.98	2194	0.0919165
新余市	2009	1.72251	0.314367	42606	34.63	2281	0.0968658
新余市	2010	1.97157	0.314663	55492	30.1	2381	0.170527
新余市	2011	2.24198	0.377596	68155	27.35	1830	0.170672
新余市	2012	2.3602	0.314663	72266	31	1961	0.173053
新余市	2013	2.26787	0.314663	69840	36.13	1997	0.24501
新余市	2014	2.41155	0.409062	77730	36.15	2009	0.209027
新余市	2015	2.48847	0.387351	81354	38.33	2041	0.27761
新余市	2016	2.67446	0.444619	88548	41.78	2067	0.25808
新余市	2017	2.82222	0.436753	87668.5	42.8713	2101	0.248157
新余市	2018	3.16002	0.28477	86789	45.03	2110	0.239384
新余市	2019	3.22408	0.623348	81641	46.86	2118.7	0.27178
鹰潭市	2004	1.10602	0.42206	8991	34.59	1385	0.0192997
鹰潭市	2005	1.15516	0.675295	11450	36.44	1406	0.0206431
鹰潭市	2006	1.26136	0.590884	13217	34.27	2448	0.0156416
鹰潭市	2007	1.42234	1.12549	20156	25.41	1633	0.110944
鹰潭市	2008	1.60723	0.619021	23222	25.49	2456	0.124892
鹰潭市	2009	1.63094	0.787845	23106	28.89	2456	0.151011
鹰潭市	2010	1.84096	0.786517	30769	27.71	2761	0.0909285
鹰潭市	2011	2.1063	0.849315	37834	26.49	2659	0.0996502
鹰潭市	2012	2.24706	0.955056	42449	27.96	3460	0.120765
鹰潭市	2013	2.30862	0.477528	44278	29.37	3449	0.322185
鹰潭市	2014	2.38106	0.449438	53011	30.17	3702	0.3796
鹰潭市	2015	2.39208	0.532865	55568	32.9	3503	0.453148
鹰潭市	2016	2.62667	0.454494	60136	34.23	3093	0.411448
鹰潭市	2017	2.75668	0.467978	65029.5	36.8889	3107	0.690868
鹰潭市	2018	2.96682	0.619663	69923	38.08	3022.77	0.710812
鹰潭市	2019	3.30527	1.12135	79883	40.39	3378.22	1.09145
赣州市	2004	1.10602	0.101574	4971	37.99	5442	0.0395714
赣州市	2005	1.15516	0.11935	6134	37.78	5743	0.036232
赣州市	2006	1.24542	0.124429	7098	37.85	11791	0.0364662
赣州市	2007	1.39438	0.129507	8487	37.23	10100	0.0768414
赣州市	2008	1.5492	0.126968	10016	36.24	10364	0.0884472
赣州市	2009	1.57874	0.129511	11201	36.92	10225	0.120313
赣州市	2010	1.74759	0.129511	13322	36.72	7996	0.0894582
赣州市	2011	1.9675	0.149826	15895	35.34	7213	0.0937801
赣州市	2012	2.09028	0.129511	17873	37.08	7433	0.0993314
赣州市	2013	2.1958	0.170141	18012	38.36	8045	0.270517
赣州市	2014	2.25267	0.151701	21708	38.92	7765	0.330838
赣州市	2015	2.29604	0.153647	23148	40.93	8047	0.422439
赣州市	2016	2.48614	0.157813	25761	43.21	4618	0.571313
赣州市	2017	2.68038	0.166476	29095	43.1906	5062	0.734488
赣州市	2018	2.9061	0.171024	32429	45.34	5453.33	0.793032
赣州市	2019	3.21561	0.132459	39968	49.79	5788.75	0.792473
宜春市	2004	1.10602	0.160694	5477	30.9	3210	0.0306027
宜春市	2005	1.18224	0.160694	6995	31.69	3210	0.0243145
宜春市	2006	1.33212	0.144524	8275	30.33	3720	0.0275857
宜春市	2007	1.4708	0.123199	9478	27.52	3664	0.0609013
宜春市	2008	1.64013	0.128555	11336	26.28	3720	0.115382
宜春市	2009	1.61086	0.123199	12769	26.2	3857	0.118759
宜春市	2010	1.74468	0.117842	16075	24.47	4986	0.12931
宜春市	2011	1.97738	0.107129	19823	23.67	5722	0.138806
宜春市	2012	2.09677	0.09106	22855	27.47	6119	0.156244
宜春市	2013	2.1868	0.107129	23998	29.38	6290	0.264103
宜春市	2014	2.27114	0.102636	27764	31.14	6403	0.396785
宜春市	2015	2.31078	0.117307	29457	33.71	6517	0.509907
宜春市	2016	2.48257	0.110825	32269	39.43	6523	0.554454
宜春市	2017	2.65997	0.120735	35734	40.6543	6689	0.82919
宜春市	2018	2.8137	0.121646	39199	42.83	6086.96	0.996669
[truncated: 2,545 more rows]

## Sheet: Sheet2
	69.15	70.91	72.09	73.25	75.53	75.11	76.07	76.46	76.85	77.95	79.65	80.23	80.98	83.52
43.2	41.49	40.21	40.54	37.94	45.27	45.95	46.16	46.99	48.05	49.34	52.15	56.44	58.62	63.46
37.27	37.69	38.94	38.92	38.9	40.15	40.51	40.07	40.16	41.44	43.81	45.84	46.44	55.51	60.74
30.62	31.06	31.14	32.25	31.11	32.8	32.42	30.98	31.72	32.27	33.27	35.55	35.5	38.02	39.85
34.5	36.04	35.19	34.44	33.32	33.86	32.75	32.66	33.71	35.76	36.8	40.03	40.26	45.83	45.59
36.8	39.08	39.27	39.85	39.53	43	41.21	39.69	40.43	39.56	39.58	42.12	44.53	51.51	55.57
34.99	32.91	33.72	34.65	36.07	34.29	33.59	31.36	31.12	31.54	34.48	38.2	38.61	46.27	53.3
33.83	34.63	35.1	36.82	37.75	39.75	37.91	36	36.06	37.34	37.89	40.8	41.7	49.52	51.98
48.21	50.8	51.7	49.71	48.19	48.53	46.86	47.72	47.33	47.03	48.01	50.2	50.75	54.43	54.31
25.22	24.44	25.12	27.06	27.69	28.46	28.74	29.16	30.16	31.74	36.04	39.41	39.49	46.89	47.33
30.87	29.69	29.46	30.17	31.06	34.52	34.77	34.85	34.96	37.16	42.5	47.1	48.6	57.06	60.44
32.09	30.81	29.79	27.1	24.83	33.48	33.28	30.18	31.42	32.38	33.2	35.82	37.68	45.68	46.53
29.17	29.6	30.13	32.93	33.68	30.35	29.63	28.65	29.58	32.1	37.65	40	39.96	46.12	52.9
42.09	50.88	51.16	47.22	48.09	54.43	53.39	52.74	53.64	54.8	58.47	61.34	62.57	61.9	61.24
34.25	40.22	41.84	41.87	41.74	47.09	46.1	43.76	43.96	47.25	49.83	52.85	57.65	58.4	57.4
35.62	40.6	38.95	39.05	39.16	41.18	39.01	38.96	39.59	40.63	43.58	48.5	50.31	51.52	52.83
27.34	34.91	35.02	34.56	31.77	32.68	30.24	28.09	28.62	30.74	37.29	44.01	44.25	41.93	43.56
30.68	31.18	30.95	31.62	32.23	32.54	32.19	30.21	31.23	33.35	37.02	39.87	42.37	43.26	42.18
30.07	31.37	29.05	30.56	31.55	42.4	37.39	36.37	35.76	37.95	39.79	48.75	50.82	56.33	54.46
39.09	47.2	43.81	38.36	38.13	47.49	44.15	38.54	39.17	40.31	42.91	45.95	47.05	44.73	47.93
31.46	36.44	36.43	36.38	34.52	38.93	36.74	36.88	36.93	38.15	42.63	46.09	47.12	44.6	47.28
28.11	28.62	27.72	26.22	24.97	30.14	25.64	22.03	22.3	24.13	31.59	37.43	38.82	34.42	35.65
25.8	29.7	30.06	29.47	29.56	35.38	34.18	30.38	31.22	33.01	37.84	43.64	45.48	47.6	49.6
26.16	32.25	32.93	34.3	34.88	39.76	38.75	35.22	37.37	38.47	42.25	46.08	47.2	48.22	49.54
44.68	42.33	43.17	42.46	40.81	41.12	38.31	36.74	34.95	33.92	37.21	39.06	40	49.27	48.73
37.18	38.95	37.61	32.3	30.92	28.93	26.23	24.4	23.09	27.89	29.35	35.1	36.37	52.7	46.94
26.75	32.75	33.83	34.3	32.41	32.02	31.17	30.02	29.46	31.55	35.15	36.94	37.35	43.15	44.99
30.05	40.64	39.66	40.65	38.3	38.87	38.63	37.34	37.01	37.64	39.44	40.87	41.85	44.55	38.53
33.05	31.66	29.07	27.49	26.6	25.62	23.97	23.11	22.54	24.33	25.45	30.56	32.1	39.27	44.52
48.49	56.31	55.29	56.62	56.16	59.16	58.71	58.69	58.68	63.05	66.36	67.86	68.56	68.67	66.41
37.95	43.32	42.32	44.99	40	43.26	43.19	41.93	42.07	45.52	47.94	48.91	50.43	55.82	57.17
24.96	35.37	35.06	33.25	32.68	30.16	27.33	26.27	25.69	33.15	35.81	42.15	42.57	37.05	36.88
32.84	36.6	35.71	31.96	31.05	34.24	32.43	30.72	29.5	33.43	36.23	37.7	37.88	49.5	51.31
44.69	50.45	49.42	46.54	45.14	45.31	44.94	44.12	43.99	43.84	45.53	47.53	56.41	58.1	61.94
42.07	45.2	44.05	42.99	40.83	43.89	42.43	41.47	41.65	42.89	45.93	50.83	51.36	51.96	53.46
35.78	39.48	39.83	39.65	40.8	42.44	41.3	41.99	41.65	41.91	43.94	46.97	57.32	53.19	51.27
32.44	38.32	37.55	37.37	36.56	37.21	35.18	33.18	33.53	33.65	38.41	43.07	42.88	39.94	44.01
34.53	34.39	33.25	32.19	30.94	34.91	32.66	32.02	33.94	35.1	39.77	42.81	47.7	48.46	45.59
44.49	42.69	41.04	40.59	39.2	37.48	35.07	35.04	36.13	37.22	40.93	43.18	52.22	52.75	56.09
35.84	40.27	39.82	37.83	38.16	35.58	35.8	34.88	35.1	36.14	38.82	41.23	45.89	49.93	55.5
35	37.82	35.6	34.76	33.77	35.65	36.96	37.57	39	40.04	42.6	44.63	49.63	48	46.59
37.1	40.83	41.4	39.56	37.71	36.67	33.72	32.64	31.92	31.98	35.6	39.28	49.19	51.05	51.71
37.62	30.92	30.73	29.8	30.32	30.4	30.52	30.5	30.5	30.8	35.35	37.67	49.02	40.6	42.94
31.84	33.09	32.46	29.77	27.07	27.95	27.55	27.61	28.38	29.45	34.42	40.53	43.73	45.17	47.87
33.21	34.98	33.65	30.84	29.06	30.17	28.65	27.76	28.24	28.37	35.82	43.82	50.42	50.39	47.51
20.12	17.15	16.99	17.75	17.33	28.1	24.65	23.52	23.53	24.07	34.51	36.89	42.44	41.39	38.49
34.87	37.56	37.91	36.78	38.82	42.42	40.04	39	39	39.99	42.53	44.37	48.36	42.52	46.08
40.61	42.42	41.78	40.19	40.29	41.49	40.74	40.47	41.46	40.22	41.12	43.69	45.2	46.85	51.84
40.68	39.09	39.28	37.27	38.31	39.33	39.44	39.46	40.32	41.46	42.66	44.03	47.18	58.81	52.47
29.03	33.57	31.99	31.23	32.72	32.95	30.12	28.7	28.97	29.24	29.67	30.93	35.48	50.45	49.87
41.19	37.14	34.57	34.04	33.97	33.19	33.39	31.98	32.14	32.55	33	34.19	35.09	45.52	60.88
36.35	36.87	37.11	36.26	35.93	37.36	37.5	37.6	37.12	36.42	38.29	39.63	43.39	52.74	58.15
33.78	32.44	31.53	31.65	32.07	32.67	29.74	31.17	31.28	31.77	32.05	33.96	37.15	46.86	61.52
32.93	36.66	36.9	37.03	38.77	38.2	36	33.07	34.75	35.93	36.82	37.58	39.73	47.72	58.33
21.82	22.03	20.96	24.49	25.85	32.43	31.17	33.81	35.51	36.43	37.46	38.52	41.82	58.63	53.99
45.34	48.32	48.27	48.69	48.82	51.28	50.96	50.63	52.84	53.54	54.86	55.92	57.59	64.85	67.68
39.77	47.1	45.38	44.59	42.25	40.97	37.55	35.92	38.44	40.54	43.24	44.83	46.38	51.13	48.35
44.45	49.29	49.85	49.62	47.78	46.93	44.35	42.67	37.72	42.78	46.68	47.11	47.61	53.14	56.9
43.08	49.01	49.02	48.65	47.55	45.1	45.3	43.16	44.01	41.75	44.68	44.92	47.28	44.76	41.34
29.53	40.11	39.46	41.64	40.97	34.26	32.14	31.57	30.71	32.29	35.87	37.61	40.08	40.55	40.65
30.99	35.69	34.69	34.41	32.34	29.13	26.95	24.12	23.71	25.94	32.82	34.93	35.81	37.44	41.86
28.39	29.95	30.08	28.56	25.56	25.81	24.88	21.83	21.69	23.25	35.87	39.01	41.68	41.12	46.8
34.54	37.8	37.86	37.97	31.95	28.2	26.48	28.06	31.55	40.56	44.73	47.13	48.79	47.79	44.48
43.73	46.15	45.93	42.69	39.53	39.42	38.09	34.34	33.01	34.59	35.84	36.51	37.7	40.06	45.4
31.92	37.38	37.47	36.9	36.95	31.87	30.41	30.43	30.95	32.35	34.9	38.4	38.03	40.51	43.19
12.18	11.05	11.22	12.01	11.8	17.53	14.48	14.36	15.27	16.44	19.76	28.59	36.76	38.92	38.82
44.72	41.71	42.63	41.85	41.75	41.15	38.84	35.33	33.06	34.31	33.35	33.97	35.56	38.76	42.92
47.86	50.48	50.59	52.58	53.66	59.36	57.28	58.05	60.45	62.24	64.82	67.76	69.78	69.9	72.73
43.72	46.9	48.01	48.42	49.99	51.31	51.85	52.4	53.4	54.38	56.49	57.32	58.39	61.04	62.02
40.2	37.81	38.8	40.1	40.95	41.3	42.8	44.03	45.17	46.02	48.4	49.11	51.34	51.14	51.48
36.47	35.33	35.46	36.02	36.64	37.29	39.71	40.55	41.47	42.5	45.21	46.24	47.38	49.03	50.1
36.5	34.58	35.85	36.96	37.98	39.62	41.43	42.4	43.9	45.22	48.05	49.51	50.9	51.5	50.19
32.03	31.2	32.66	34.56	36.36	39.41	41.38	42.75	44.24	45.73	48.43	49.94	51.54	50.81	51.51
33.69	33.03	34.42	35.09	35.06	35.81	37.25	38.52	40.04	41.08	44.24	45.8	47.74	48.43	46.39
33.5	35.33	35.95	36.24	36.3	37.3	39.02	39.14	39.6	40.26	41.42	42.53	43.13	44.69	45.03
30.6	33.14	34.11	34.79	35	36.49	39.26	39.78	40.8	41.75	44.08	45.93	47.74	48.16	48.25
32.26	33.26	33.42	34.07	34.28	34.58	36.95	37.82	38.17	38.85	40.77	42.08	43.53	45.15	47.54
36.6	34.01	35	35.28	35.47	36.06	37.62	38.7	40.01	41.02	42.86	43.89	44.96	47.01	47.51
36.67	34.97	35.37	36.39	36.48	37.32	39.52	40.59	41.63	42.66	46.12	46.9	47.62	47.78	48.03
34.32	31.1	32.1	33.19	34.17	35.17	37.64	38.77	39.8	40.8	43.44	44.96	47	46.86	45.1
29.11	30.07	31.58	32.01	32.99	34.39	37.39	37.6	38	38.43	38.9	39.35	39.81	42.55	46.8
41.47	44.09	45.1	45.85	46.29	49.33	48.69	49.27	50.94	52.93	55.25	58.24	60.89	63.9	66.17
32.14	33.91	33.51	33.97	34.4	36.39	36.24	37.24	39.3	40.2	41.58	43.44	44.4	43.77	43.89
34.23	35.39	34.2	34.94	34.66	36.77	37.07	38.56	39.37	40.17	42.77	44.87	46.29	48.46	44.63
38.92	46.06	45.89	45.26	43.78	44.9	44.85	44.98	45.38	45.5	48.17	48.7	48.7	56.63	54.64
37.02	40.69	40.58	40.53	40.98	43.04	43.41	44.2	45.43	46.4	48.67	50.32	51.38	54.12	56.6
33.1	33.26	33.65	33.95	34.96	37.47	38.6	39.78	41.24	42.12	43.56	45.1	45.59	48.16	48.46
38.62	41.63	41.66	42.63	43.76	44.82	44.37	45.34	46.39	46.78	50.09	53.4	56.17	58.02	55.14
33.32	39.22	39.3	39.55	40.41	41.68	41.69	42.64	44.34	45.17	47.02	49.42	49.98	49.8	48.93
37.57	40.85	41.31	41.85	40.46	41.49	40.97	40.57	40.85	40.75	43.51	46.05	47.2	51.82	54.52
34.69	38.75	37.49	35.93	34.56	37.69	36.58	36.15	38.69	39.52	42.47	45.97	47.84	49.5	53.11
37.27	39.83	40.06	40.31	40.36	41.2	40.15	40.51	42.49	43.64	44.07	45.24	45.23	45.9	49.06
35.47	40.74	41.02	41.86	38.9	38.42	35.95	32.68	33.1	33.23	35.75	38.79	40.47	41.01	43.12
30.73	35.5	35.13	37.43	36.89	36.51	34.23	32.3	32.64	33.24	35.29	40.35	42.82	47.6	49.57
34.05	34.56	35.02	34.72	33.42	31.17	29.5	27.93	27.85	27.84	28.75	29.81	34.44	36.13	42.35
34.18	39.86	40	40.98	38.8	40.85	38.2	35.34	36.19	36.62	39.6	40.91	44.15	46.77	45.73
33.67	38.37	37.35	36.84	36.02	35.3	33.49	32.64	32.79	33.25	34.26	36.67	38.65	40.44	48.85
33.72	39.86	40.03	39.02	37.22	35.6	34.18	32.49	32.24	32.39	32.89	36.17	37.39	44.12	50.47
40.44	49.02	46.71	45.24	43.53	42.26	41.17	39.22	39.17	39.42	39.88	42.75	44.99	50.28	60.6
33.81	39.84	39.7	40.75	39.8	35.94	33.91	32.17	32.16	31.73	32.6	36.99	41.61	43.42	47.5
35.49	35.63	34.86	35.35	30.21	29	27.8	27.09	28.16	29.87	33.78	39.53	40.55	42.63	49.27
31.84	34.77	30.14	29.6	30.3	29.51	25.19	23.36	24.66	26.1	26.98	33.07	35.38	37.66	48.19
23.87	30.51	31.42	30.31	28.18	29.61	27	26.07	27.73	29.34	31.88	37.52	38.99	41.88	46.59
30.76	32.84	35.11	33.72	30.16	29.02	26.61	25.21	25.58	25.13	28.95	34.1	35.95	38.56	50.51
33.31	39.3	37.31	37.21	34.13	32.72	30.38	27.66	27.85	27.75	30.98	37.92	39.3	43.77	47.4
30.78	38.09	38.63	39.51	38.52	34.59	31.23	29.8	29.72	32.61	33.49	36.53	39.97	39.7	45.98
45.3	47.7	47.04	48.3	46.86	46.04	43.2	41.99	42.33	42.66	43.06	49.73	51.35	56.71	57.82
33.9	38.2	40.19	41.14	40.23	37.51	35.9	34.18	34.33	34.89	38.53	40.04	41.57	44.63	50.83
38.5	41.16	42.73	43.17	42.26	48.15	46.06	45.5	45.84	45.8	46.45	48.66	50.26	52.91	53.61
32.7	36.81	35.78	34.93	31.39	36.06	33.5	33.47	33.3	32.13	32.41	34.2	35.09	35.77	34.42
39.39	38.67	38.86	38.13	36.77	37.83	36.28	34.05	33.67	33.25	33.86	35.25	35.75	40.48	42.41
38.52	40.94	40.73	41.67	39.76	41.37	38.56	35.02	33.48	31.28	31.41	31.89	32.68	34.94	35.99
34.61	32.37	31.32	32.32	31.15	34.68	33.56	32.22	32.87	35.03	34.98	35.69	36.98	42.2	42.15
40.5	36.21	36.23	36.24	36.2	38.25	36.13	34.11	34.39	34.88	35.02	37.14	38.54	39.93	38.93
38.32	34.76	34.13	35.02	34.18	37.3	36.62	36.12	36.16	35.72	36.24	38.06	39.95	41.08	41.03
34.17	34.06	33.05	32.1	31.25	35.87	33.74	31.15	31.16	34.19	34.37	35.84	37.2	41.86	43.77
38.42	43.05	44.53	45.57	46.18	51.56	49.15	47.95	50.33	51.6	54.67	55.71	58.57	58.16	57.96
39.85	39.99	39.21	39.49	38.49	38.59	41.25	36.25	38.65	39.82	40.57	41.22	42.85	45.94	48.78
37.58	37.34	36.64	34.54	32.1	32.53	30.97	29.08	32.71	34.03	34.42	35.91	37.1	45.81	49.16
29.37	31	30.47	29.81	28.83	29.62	28.56	26.7	31.96	33.61	34.28	36.42	39.29	47.61	48.18
34.87	33.11	32.63	33.06	33.08	35.88	34.33	32.85	34.71	35.8	36.98	39.28	40.77	42.52	44.83
31.46	31.84	30.32	28.09	27.98	34.63	30.1	27.35	31	36.13	36.15	38.33	41.78	45.03	46.86
34.59	36.44	34.27	25.41	25.49	28.89	27.71	26.49	27.96	29.37	30.17	32.9	34.23	38.08	40.39
37.99	37.78	37.85	37.23	36.24	36.92	36.72	35.34	37.08	38.36	38.92	40.93	43.21	45.34	49.79
30.9	31.69	30.33	27.52	26.28	26.2	24.47	23.67	27.47	29.38	31.14	33.71	39.43	42.83	46.67
37.48	36.35	36.11	35.09	33.48	32.3	32.18	30.17	32.4	34.94	35.99	37.84	40.11	42.08	50.17
31.56	36.36	35.93	33.4	30.03	29.29	29.67	28.36	30.33	31.67	32.51	34.16	35.53	42.71	44.4
26.49	32.81	31.88	31.5	29.83	31	31.06	28.28	28.74	30.63	31.65	33.84	34.9	44.64	47.77
38.39	41.59	41.96	43.03	44.12	45.4	46.43	47.74	48.96	50.12	51.22	52.79	54.73	56.36	60.89
46.81	46.8	47.51	48.95	50.1	51.05	52.62	53.09	54.39	55.3	55.78	57.18	58.9	60.52	61.79
30.87	29.01	30.6	31.58	31.69	33.6	34.7	36.22	37.45	39.25	40.75	42.53	44.1	45.04	45.99
27.82	26.81	27.46	27.44	28.42	29.08	31.28	32.97	33.98	35.14	38.21	39.72	41.19	42.7	47.11
32.57	30.66	30.24	30.73	31.09	32.11	33.44	34.94	36.33	37.72	39.91	41.6	43.27	44.41	51.19
30.69	29.45	29.55	30.34	30.3	32.48	33.65	34.48	36.28	38.23	39.66	43.02	43.02	47.15	50.62
34.54	31.29	31.98	32.39	32.13	33.06	34.05	34.85	35.87	36.92	39.58	41.43	43.51	44.72	48.2
33	33.98	35.26	36.53	36.8	37.39	38.74	40.04	41.76	43.07	44.26	45.96	47.97	49.16	53.22
34.44	31.5	32.38	33.02	33.89	35.57	36.89	38.47	40.18	41.67	43.7	45.19	46.74	47.95	50.25
24.76	23.99	25.02	25.87	26.08	26.94	29.38	30.66	32.73	34.72	36.05	37.05	38.7	41.04	50.24
22.22	22.7	23.25	25.08	25.69	27.57	29.2	30.8	32.01	33.24	34.69	35.96	37.77	39.22	47.88
30.27	29.54	30.21	31.05	31.96	32.01	33.04	33.9	34.86	35.98	39.26	40.32	42.06	42.82	47.87
26.7	26.14	26.59	27.41	29.14	33.63	35.37	36.71	37.86	38.9	40.43	41.93	44.34	46.26	48.27
14.45	13.59	15.65	20.12	20.05	22.45	23.74	24.75	25.67	26.91	30.02	31.94	34.33	34.26	37.56
29.1	28.74	29.4	30.15	31.43	31.43	36.19	37.92	38.86	40.53	44.01	45.38	47.3	48.31	49.89
34.58	35.84	35.67	35.45	35.01	35.33	35.44	36.35	37.77	38.95	40.99	42.92	44.58	44.12	48.73
41.86	43.08	42.99	43.94	41.6	42.89	40.74	39.64	40.98	41.67	46.37	48.64	51.28	54.67	58.95
34.18	30.1	30.77	32.36	32.39	33.95	33.13	34	34.47	34.73	35.45	41.38	42.99	47.44	46.39
31.45	31.78	30.18	30.17	30.19	33.01	31.74	31.17	32.51	34.34	41.87	44.32	46.98	50.34	48.84
28.95	27.93	27.45	27.5	25.29	25.48	24.92	25.28	29.36	31.33	36.08	38.02	41.28	44.73	46.62
26.24	26.64	26.45	25.77	23.71	27.21	26.39	29.47	30.55	31.09	36.19	38.59	41.7	45.7	46.34
23.68	20.96	20.77	21.17	19.66	20.25	19.66	20.68	20.96	20.68	29.7	31.59	34.07	39.47	51.71
32.73	32.11	32.33	32.34	31.33	30.37	29.1	28.29	30.48	31.39	31.55	38.96	40.15	43.19	45.44
28.64	28.02	26.93	26.26	25.04	24.68	23.22	23.2	24.65	24.79	30.78	33.13	34.33	37.73	40.97
26.24	23.13	23.37	23.77	21.76	19.14	18.26	18.08	18.88	18.46	23.33	26.09	26.76	29.72	33.54
23.46	22.4	22.2	22.92	21.76	20.6	20.1	21.32	22.62	23.32	30.39	33.19	34.35	37	37
21.65	19.79	19.39	19.39	17.24	17.82	17.53	18.23	19.22	19.72	24.7	26.34	27.12	31.09	45.04
31.94	29.78	27.39	25.9	24.69	25.76	23.47	23.31	23.98	25.74	28.5	32.35	34.2	37.14	41.74
23.48	23.7	24.52	26.12	26.64	27.54	27.39	28.13	29.74	31.38	35.98	38.25	39.65	43.95	51.84
26.63	27.05	27.77	28.68	27.99	27.3	27.29	28.16	30.12	30.88	34.6	37.41	39.17	42.68	44.27
29.86	32.38	32.8	33.78	33	32.27	31.41	32.12	33.02	33.02	33.43	35.65	38.56	43.72	45.39
23.49	25.81	25.76	27.1	26.93	25.4	24.81	25.85	25.89	25.19	25.42	32.35	33.84	38.17	41.21
25.72	27.48	28.21	30.17	29.9	31.13	30.54	30.1	30.54	30.69	35.19	37.65	39.85	43.54	42.75
48.57	49.57	49.37	50.06	50.19	50.42	51.44	48.94	47.89	47.72	49	51.02	52.84	54.61	60.75
37.48	39.8	39.07	38.9	39.1	37.13	35.01	30.19	29.79	30.44	32.01	35.8	36	35.41	43.18
32.62	41.14	43.45	40.79	42.02	41.69	34.87	35.53	36.02	36.14	36.6	38.96	40.17	42.69	47.55
32.06	38.61	38.71	36.81	36.05	34.99	33.53	31.55	31.83	31.44	32.01	34.1	35.19	36.93	45.63
30.36	35.04	35.96	33.77	32.95	32.75	31.07	28.25	27.53	27.97	29.47	30.37	32.02	38.03	44.62
32.56	39.17	38.22	38.58	37.5	35.43	32.85	29.25	28.64	29	29.5	31.25	32.94	38.91	42.27
34.46	36.5	34.82	32.77	29.72	31.05	28.46	28.53	27.61	28.11	28.88	30.54	33.34	38.54	42.92
33.71	38.59	38.74	37.31	35.43	33.38	31.76	29.88	29.4	29.97	30.98	32.98	34.08	36.68	40.78
34.72	36.19	37.11	37.6	36.66	35	33.54	32.29	31.81	31.76	32.35	33.76	34.17	36.6	43.8
29.92	35.91	36.77	35.06	33.95	33.05	33.3	33.32	33.13	34.11	35.36	37.2	39.21	40.64	44.91
30.8	35.17	35.52	34.36	34.42	35.34	34.9	34.35	33.64	32.81	32.73	34.08	35.72	37.63	43.27
27.7	31.18	32.05	31.59	33.05	34.11	33.22	32.9	32.49	32.77	33.56	35.24	36.75	37.41	39.75
46.28	50.25	49.18	48.7	42.03	44.64	41.96	39.58	39.61	40.7	41.81	45.06	47.8	54.75	58.54
36.65	36.07	36.01	34.39	33.27	34.81	32.52	31.03	31.44	31.96	33.04	35.05	39.1	49.28	47.41
41.33	41.24	40.07	37.51	35.19	35.47	33.4	31.41	31.67	32.59	34.88	36.91	39.63	46	44.27
38.98	36.56	35.99	36.51	35.19	36.57	35.92	34.63	35.01	36.49	38.28	40.16	43.38	55.33	56.36
40	41.05	41.2	41.32	40.73	39.05	37.89	35.99	36.72	38.63	40.31	41.79	43.11	48.24	56.02
34.74	33.67	33.81	32.11	31.09	34.05	31.8	30.07	32.8	33.9	35.33	38.88	41.47	48.86	49.58
34.13	33.49	33.62	33.73	32.61	36.38	35.28	34.63	35.69	37.03	38.91	41.21	44.46	51.88	48.72
53.97	57.75	59.43	59.44	59.61	63.59	62.35	61.39	62.33	62.15	64.09	65.66	67.33	72.13	72.7
44.29	43.31	43.08	41.06	38.26	38.1	36.71	34.77	35.06	35.78	37.48	39.33	42	47.94	41.79
42.61	43.21	43.42	42.14	42.1	40.33	38.83	37.62	38.21	39.54	40.59	41.71	44.3	49.93	51.59
38.54	34.95	35	34.15	34.8	37.3	33.33	31.17	31.72	32.64	33.67	35.58	38.13	46.52	51.84
34.75	35.13	34.41	34.36	31.4	32.96	31.54	29.4	29.99	31.39	32.03	35.02	36.98	44.81	50.79
47.65	45.33	44.87	43.04	41.68	44.45	42.76	40.33	40.62	41.95	41.85	43.68	47.46	57.04	58.37
53.03	57.79	57.6	58.41	59.02	60.85	61.01	61.51	63.59	64.62	65.23	67.11	69.35	71.75	71.62
37.99	46.61	47.42	49.84	51.04	53.25	52.72	53.5	55.65	56.54	57.39	58.78	60.05	58.78	60.93
39.39	43.54	41.87	41.89	42.38	44.85	42.55	42.99	45.78	46.33	47.37	48.04	49.54	49.09	53.84
41.24	42.14	41.37	41.53	40.24	39.51	38.56	43.29	42.41	42.21	42.01	43.34	44.34	44.8	48.01
37.21	36.42	34.5	33.15	32.2	35	35.45	34.58	35.83	36.1	36.36	37.83	38.69	42.04	42.32
33.96	39.99	37.94	37.34	37.66	45.05	44.18	43.63	44.54	44.6	46.82	49.33	49.6	54.89	53.16
34.68	39.94	35.73	33.19	31.66	34.86	35.83	34.59	35.38	38.24	41.53	42.68	45.23	50.96	54.36
31.94	35.42	33.87	35.25	35.6	39.24	38.54	39.7	42.31	43.22	42.97	43.7	44.9	50.2	50.31
30.82	33.59	33.31	33.98	34.12	37.85	35.15	35.99	36.57	37	38.74	40.2	41.12	43.03	43.16
35.52	36.29	34.87	35.03	35.69	38.16	37.59	36.7	37.18	36.89	38.21	38.75	39.84	41.26	48.6
42.15	42.43	41.4	42.8	46.89	51.17	48.72	49.65	52.21	53.75	52.14	53.1	53.17	51.05	43.16
30.02	35.22	35.33	36.08	36.46	39.37	39.22	41.56	42	42	42.34	43.55	45.5	49.3	48.91
40.6	38.18	37.22	36.01	34.34	34.24	37.01	37.97	40.95	41.41	42.88	43.79	44.61	44.5	48.93
31.61	35.61	35.96	35.74	35.59	35.99	35.62	34.89	34.06	32.04	35.45	38.45	41.78	49.4	46.37
35.08	32.87	31.6	31.12	30.6	39.89	38.3	37.97	40.43	40.01	41.41	42.74	42.6	46.14	46.48
38.94	37.71	37.85	39.42	39.57	43.05	42.01	41.79	41.45	41.37	43	43.04	43.32	45.86	47.54
36.82	43.37	42.4	42.55	40.64	43.73	40.42	38.56	37.91	36.54	35.24	35.1	36.83	49.02	41.68
27.49	38.59	34.18	31.52	29.16	31.85	32.33	41.4	44.46	45.25	44.17	47	47.97	50.54	51.23
37.85	35.65	34.29	35.1	35.58	37.64	37.47	38.37	37.99	37.1	38.02	39.73	41.32	44.29	41.96
30.65	34.69	34.79	32.2	31.12	33.62	31.66	29.55	28.44	27.23	29.5	31.52	34.88	40.19	52.15
29.92	29.75	28.1	27.91	28.39	33.69	33.7	32.65	31.92	34.44	34.76	36.53	38.46	43.99	50.26
51.14	51.49	50.39	50.4	49.91	51.48	50.21	48.67	48.72	47.89	48.51	49.68	50.79	59.1	65.55
33.44	34.98	33.87	31.78	30.13	30.51	27.82	27.86	28.88	28.65	33.45	36.11	37.75	40.93	43.25
37.11	36.36	36.79	36.18	35.34	37.34	36.96	35	34.73	34.11	34.97	36.16	37.8	49.32	54.31
37.3	35.515	33.73	29.7	29.53	30.31	27.29	24.19	24.32	22.34	28.1	30.8	30.86	45.62	49.22
40.86	37.05	34.03	36.82	34.18	38.4	35.75	34.99	30.55	29.73	29.22	31.67	31.37	35.35	40.84
37.31	36.505	35.7	33.66	33.11	34.35	35.33	33.44	33.62	30.58	30.18	30.93	30.65	36.76	37.23
31.61	30.26	29.99	30.53	31.54	35.2	32.64	30.91	34.04	33.85	37.68	37.85	36.21	39.75	46.07
32.87	37.08	38.12	35.43	35.27	36.23	34.58	36.07	37.86	37.45	39.62	39.61	39.15	40.83	46.29
28.17	36.82	37.27	36.65	36.98	37.2	35.12	34.08	35.44	35.71	37.36	38.13	39.3	48.38	52.83
28.69	24.64	25.04	23.68	25.77	32.44	31.54	31.54	31.77	31.84	35.32	37.66	37.67	44.74	45.78
27.18	29.14	27.2	27.48	26.56	30.1	27.26	26.38	27	27.64	29.33	30.54	30.27	35.53	40.08
33.93	34.95	33.44	31.64	32.83	35.2	32.98	35.26	38.97	38.79	43.04	44.85	46.64	47.9	50.32
22.81	25.23	26.41	26.61	29.23	29.91	28.41	27.58	29.4	31.35	34.39	36.41	37.63	41.64	47.01
35.85	34.52	31.44	33.43	33.88	36.15	32.73	30.39	32.16	31.98	34.61	37.05	37.56	37.13	49.55
58.97	64.75	63.42	64.96	67.35	68.57	69.58	68.37	68.54	69.59	74.85	75.84	76.35	77.54	79.23
36.76	45.53	38.79	42.53	46	61.87	65.25	65.31	65.28	66.9	65.01	65.72	66.09	68.68	72.86
39.79	43.9	44.82	42.4	40.97	37.89	36.35	36.2	39.39	41.53	46.78	47.7	48.13	52.33	53.2
45.56	49.87	48.85	47.68	46.51	49.59	50.17	49.36	49.46	50.22	51.62	52.81	53.11	54.12	65.57
37.34	36.89	35.77	34.06	32.21	31.23	29.67	28.54	27.82	28.31	29.39	30.68	31.43	42.76	45.76
22.03	25.91	24.98	23.92	22.16	24.45	22.11	20.7	20.66	21.95	23.47	25.17	26.12	34.31	36.41
36.58	36.06	35.37	33.04	30.57	31.28	28.3	25.74	25.51	26.35	27.06	27.99	28.89	36.66	40.48
31.74	28.47	27.26	26.2	26.21	26.5	25.63	24.38	24.67	26	27.15	30.75	33.47	40.63	39.25
39.98	36.29	35.54	33.72	34.11	35.09	33.89	31.4	31.27	32.2	33.35	34.19	36.83	46.58	49.1
34.28	38.14	37.91	35.24	35.66	39.37	37.18	34.59	33.41	33.71	35.4	36.36	37.3	40.56	42.37
34.69	31.98	30.92	28.1	26.28	27.89	26.48	25.35	25.33	26.83	27.3	28.37	32.19	40.16	40.51
32.61	32.88	31.45	29.27	26.3	25.53	22.94	21.17	20.93	21.67	22.75	24.17	27.09	41.2	49.05
29.49	29.3	27.87	26.14	24.72	28.08	27.07	25.72	26.03	26.88	29.16	30.1	35	45.04	43.95
36.37	34.3	33.14	30.13	29	29	27.14	25.8	25.44	25.79	27.85	29	32.44	39.89	42.22
30.03	30.04	29.26	27.35	25.51	27.07	25.01	23.11	23.08	24.56	26.19	27.5	31.09	38.05	39.02
33.61	35.09	36.44	35.71	34.68	33.06	31.28	29.64	29.19	29.66	30.56	32.03	32.58	40.11	50.81
30.64	32.16	31.21	28.84	28.69	28.64	26.2	24.39	24.77	25.46	27.06	29.79	37.03	44.97	48.5
29.59	28.88	28.4	27.03	25.66	25.35	23.97	22.86	22.36	22.85	23.78	24.92	29.32	36.77	51.17
28.25	27.46	27.13	26.15	24.86	28.16	26.28	25.59	25.28	26.07	27.6	28.36	32.3	41.01	47.38
37.16	36.58	37.35	35.62	34.4	38.99	37.13	34.39	33.29	34.97	36.3	36.61	36.87	35.8	51.48
27.27	32.63	31.65	30.53	28.2	29.34	27.48	26.53	26.15	27.39	28.47	29.69	32.55	39.82	50.9
40.26	45.89	45.32	47.02	47.21	54.2	54.18	53.05	53.56	55.4	56.57	57.17	57.06	58.75	58.98
27.32	34.1	33.07	34.27	30.78	33.1	33.6	32.11	33.01	36.31	38.35	39.33	40.21	41.67	41.77
31.69	35.2	35.3	35.85	34.34	44.16	42.79	42.52	41.41	39.92	39.81	39.12	40.37	41.12	41.87
32.39	38.79	39.9	39.94	40.08	46.18	44.65	45.03	46.06	47.47	48.42	48.72	49.93	50.32	51.34
44.78	47.81	47.09	47.3	50.29	48.1	49.01	48.4	48.93	50.03	53.67	55.28	56.73	56.59	63.73
38.92	34.14	32.51	32.66	32.57	36.62	34.34	32.38	30.89	29.82	30.75	36.65	38.41	37	45.04
26.74	29.72	27.87	27.23	26.96	29.78	29.37	27.86	28.21	28.81	30.3	29.75	31.41	43.5	45.3
23.55	29.93	30.03	28.2	27.05	29.96	28.37	27.72	27.87	29.5	30	33.27	37.47	38.66	46.95
37.34	38.48	37.83	37.9	36.13	37.04	36.54	34.13	32.82	31.78	35.97	37.35	38.74	38.44	50.86
42.4	39.51	39.66	39.66	39.66	38.83	38.85	36.88	36.7	36.9	37.38	39.48	40.44	39.09	40.44
44.35	48.29	46.45	45.2	44.55	44.36	43.54	41.24	40.47	38.65	40.06	44.83	45.79	45.7	54.6
31.15	31.87	30.88	30.67	30.91	32.84	31.95	29.57	26.85	26.45	26.58	37.24	38.19	40.08	46.61
49.29	52.2	51.85	51.52	50.18	53.92	52.2	51.6	52.42	52.18	56.14	59.55	61.17	61.86	63.03
40.54	39.86	37.07	34.78	32.63	31.99	30.39	28.91	28.18	26.45	30.08	33.67	40.42	49.26	55.58
34.42	31.95	30.9	30.33	28.73	28.55	26.38	25.34	24.39	23.99	26.17	26.91	27.62	29.48	34.68
34.34	35.68	34.69	33.78	31.26	32.27	29.32	27.07	26.29	25.2	25.79	27.21	27.63	31.08	40.07
36.16	35.63	35.77	34.71	36.26	36.91	34.68	31.42	31.47	29.9	32.68	35.26	38.87	41.22	45.07
40.25	38.33	37.2	36.98	36.57	41.25	39.2	36.7	36.4	34.74	35.23	37.98	39.41	38.34	42.45
47.59	44.68	44.01	42.5	40.17	41.54	39.9	37.34	34.71	31.86	31.39	32.32	34.66	33.84	41.51
41.32	40.2	39.21	38.36	35.38	41.79	38.49	35.63	35.14	32.37	32.24	33.23	33.01	34.98	42.64
20.1	15.1	13.65	12.14	11.99	21.6	20.19	18.97	18.81	19.84	21.9	28.78	36.11	31.74	30.93
24.25	28.97	23.79	18.16	14.79	28.52	26.11	24.02	23.05	25.35	27.69	32.06	33.53	31.18	28.9
41.43	52.01	50.96	50.57	49.62	49.87	48.84	48.78	49.53	51.05	56.15	59.98	62.44	64.11	64.87
12.87	19.71	18	17.17	16.75	19.7	18.5	16.75	16.79	23.86	28.57	40.68	57.79	37.54	35.55
12.76	16.66	14.2	11.38	14.03	14.8	15.4	16.48	18.7	21.07	27.13	33.78	39.92	38.31	28.33
30.09	35.13	33.27	31.56	31.2	32.35	32.91	31.39	31.49	33.86	36.97	41.68	45.71	44.69	44.97
42.33	44.01	44.84	44.39	44.52	42.7	42.23	41.49	41.64	44.29	47.15	48.89	50.83	55.36	56.58
31.87	37.09	35.93	34.78	33.55	37.05	34.73	35.42	34.36	36.39	40.49	48.49	49.92	53.65	43.83
29.36	34.14	34.55	32.91	32.73	34.29	35.25	34.76	36.44	38.93	42.37	45.16	46.86	55.87	54.84
33.32	40.53	39.75	38.95	39.84	33.99	33.56	33.1	31.74	33.01	34.09	39.37	39.57	46.25	54.98
31.8	40.42	41.11	39.01	40.97	45.66	44.31	44	42.72	44.98	50.35	52.95	53.43	59.55	65.42
34.65	38.81	36.63	35.74	44.32	47.83	45.1	43.8	44.04	45.65	48.35	54.55	56.7	61.6	58.3
34.48	35.34	37.17	36.07	34.28	32.46	31.27	31.06	31.45	34.75	39.87	45.02	47.17	51.47	52.87
29.45	27.06	25.69	24.63	23.89	25.64	25.65	23.8	23.97	27.81	28.61	33.79	37.53	39.75	38.38
43.84	49.45	46.65	43.87	41.59	46.41	45.05	43.08	44.7	43.73	46.7	48.66	49.14	60.04	66.09
41.45	48.32	46.99	44.56	45.35	44.98	44.64	42	41.79	42.28	42.17	43.81	45.34	50.85	52.89
28.27	29.2	27.87	25.19	22.54	29.01	31.33	29.93	29.92	30.39	29.9	30.71	31.92	34.33	45.7
30.98	33.5	30.62	29.57	28.75	30.37	31.71	30.76	30.83	31.58	28.9	30.57	30.87	30.92	43.59
30.22	42.83	42.83	36.75	37.26	41.2	40.16	38.66	39.29	39.15	38.44	38.83	40.55	42.16	43.46
39.91	52.18	52.34	51.74	51.08	49.72	50.05	47.79	49.26	49.32	50.71	51.96	54.04	53.04	62.92
59.95	61.42	61.16	59.42	56.54	57.15	53.65	53.78	57.39	59.08	62.08	68.88	70.22	68.59	72.65
12.14	11.13	9.87	9.92	8.58	12.67	9.76	10.15	11.47	22.49	23.91	33.96	29.59	26.54	31.3

## Sheet: Sheet3
0.309471	0.228626	0.245529	0.970158	1.06968	1.03931	1.26768	1.12648	1.11829	1.20342	1.32537	1.25049	1.11332	1.29116	1.40459	1.22534
0.078158	0.0756946	0.0758474	0.44231	0.450917	0.451954	0.468895	0.532154	0.592939	0.645843	0.693058	0.730552	0.699867	0.625152	0.561997	0.7796
0.0234349	0.0252914	0.0224116	0.133718	0.144174	0.129052	0.132375	0.154812	0.166788	0.164619	0.141014	0.166309	0.206318	0.162878	0.195179	0.212346
0.0137241	0.0123691	0.0139153	0.106116	0.109621	0.101167	0.106794	0.113838	0.180658	0.147809	0.131051	0.105198	0.135081	0.108895	0.128048	0.142541
0.0163269	0.0168325	0.0157489	0.0980082	0.0896871	0.0999613	0.0910797	0.0957287	0.1606	0.176397	0.21961	0.131314	0.132577	0.149497	0.153678	0.190849
0.0300669	0.0358837	0.0445714	0.074322	0.0902313	0.385711	0.123849	0.0901476	0.10567	0.103227	0.112686	0.0865465	0.153684	0.145906	0.18583	0.150277
0.00871382	0.0114817	0.010192	0.0452668	0.0571894	0.0520115	0.105877	0.0634924	0.0700062	0.084588	0.074822	0.0742383	0.107712	0.129685	0.11996	0.15052
0.0255388	0.0196587	0.018671	0.0551528	0.0530486	0.0561284	0.053633	0.0438071	0.0525064	0.0686595	0.111554	0.0555798	0.122939	0.126428	0.156813	0.137742
0.0105415	0.0125828	0.0134951	0.0768164	0.0626613	0.0744026	0.0838154	0.100834	0.105067	0.118819	0.157997	0.0735339	0.216044	0.202688	0.187324	0.192581
0.0124611	0.0135292	0.0111767	0.0643616	0.0638825	0.0910166	0.06945	0.0754204	0.0770857	0.0800025	0.116622	0.0782838	0.124024	0.118639	0.134855	0.143358
0.0311673	0.0341905	0.031622	0.154933	0.141437	0.179681	0.174221	0.173239	0.187747	0.162799	0.135315	0.168182	0.282507	0.232002	0.18018	0.232406
0.0364253	0.0311416	0.0286684	0.127597	0.121157	0.125231	0.116417	0.124072	0.132877	0.168384	0.124092	0.114563	0.167409	0.146098	0.171568	0.12692
0.0212324	0.0183377	0.0196714	0.0720651	0.0772151	0.0844955	0.0862216	0.0721794	0.0725599	0.0738717	0.07168	0.0697127	0.119935	0.204709	0.29016	0.370233
0.0243404	0.0239822	0.0285701	0.275773	0.280352	0.240862	0.264418	0.372867	0.413523	0.468193	0.558925	0.468058	0.281489	0.547862	0.644738	0.575934
0.0432847	0.0273598	0.0290425	0.125477	0.133947	0.117432	0.128637	0.125526	0.1115	0.119605	0.128928	0.0741714	0.0878732	0.196306	0.171821	0.171365
0.0275246	0.0257177	0.0220689	0.161066	0.175244	0.170916	0.167452	0.142412	0.161824	0.151093	0.135076	0.0976161	0.0854763	0.135234	0.0891243	0.103574
0.0322475	0.0314987	0.0302998	0.167664	0.144136	0.153568	0.159134	0.189225	0.193849	0.211664	0.110687	0.135476	0.277896	0.129588	0.119273	0.102689
0.0316141	0.0284811	0.0347961	0.169422	0.170885	0.168814	0.174774	0.168418	0.189423	0.209494	0.190863	0.215604	0.0924772	0.115559	0.11138	0.209734
0.0132219	0.0147536	0.0126855	0.104036	0.123286	0.110617	0.10914	0.114383	0.123372	0.136915	0.0967202	0.102616	0.0505956	0.0829097	0.0527011	0.061968
0.0365609	0.0300891	0.0314212	0.181006	0.218764	0.199452	0.204066	0.208044	0.264774	0.271271	0.12651	0.135166	0.148268	0.214079	0.139223	0.134511
0.0137842	0.0160717	0.0128864	0.124756	0.133302	0.133399	0.132476	0.13411	0.142495	0.169111	0.184154	0.181968	0.138704	0.19121	0.157992	0.186863
0.0402594	0.0274298	0.0245963	0.066972	0.0908132	0.102525	0.137865	0.125249	0.151981	0.210654	0.143869	0.111822	0.167245	0.187381	0.124204	0.141164
0.0195246	0.0151196	0.016374	0.113055	0.0981936	0.0992612	0.116846	0.101703	0.119419	0.13823	0.114751	0.077581	0.0777148	0.135837	0.077706	0.0566345
0.0139839	0.0119151	0.0148671	0.080645	0.093442	0.0856422	0.130536	0.117887	0.112619	0.159607	0.15234	0.131642	0.109421	0.155864	0.121665	0.0984389
0.0368617	0.0282952	0.0301726	0.160997	0.204375	0.200586	0.170212	0.176974	0.180009	0.219069	0.232413	0.249001	0.21179	0.131334	0.122532	0.113965
0.0467012	0.0398095	0.0451059	0.130498	0.140344	0.138684	0.147966	0.118952	0.0897952	0.118981	0.0853403	0.10494	0.0677138	0.08144	0.0879917	0.100781
0.0452569	0.0385741	0.0330425	0.119273	0.152984	0.110778	0.098467	0.110153	0.072417	0.122692	0.162179	0.0883369	0.0699245	0.0889873	0.0962696	0.073354
0.0303385	0.0264785	0.0214749	0.0984877	0.1025	0.150884	0.108016	0.220302	0.131065	0.100819	0.0578993	0.0878085	0.0467232	0.0583635	0.0927134	0.136602
0.0872345	0.0784687	0.0715949	0.0890616	0.0985287	0.0730781	0.141283	0.0899158	0.0874922	0.111452	0.069375	0.0777751	0.0937862	0.0891751	0.0844268	0.0723314
0.0130639	0.00926496	0.00796592	0.0649331	0.112567	0.107026	0.103199	0.102358	0.0934613	0.115448	0.12441	0.0825233	0.134762	0.120475	0.115023	0.257499
0.0311675	0.0217745	0.0211955	0.130794	0.118721	0.125558	0.11877	0.121634	0.112039	0.128215	0.141759	0.145003	0.150904	0.114857	0.163521	0.157723
0.0286757	0.0209387	0.0198823	0.150547	0.137859	0.190548	0.198607	0.229863	0.189843	0.424816	0.249227	0.348712	0.313355	0.14054	0.203575	0.161307
0.0320524	0.0329149	0.02792	0.083879	0.0754526	0.0760772	0.0733915	0.0589152	0.0740305	0.0767842	0.0990457	0.0770332	0.0720227	0.0700636	0.123142	0.103612
0.0475828	0.0516234	0.0477728	0.30857	0.325157	0.319296	0.305911	0.343717	0.373198	0.388249	0.374222	0.322514	0.403646	0.279477	0.287849	0.307594
0.0226174	0.0269348	0.0205513	0.379927	0.379216	0.425768	0.515752	0.539217	0.561019	0.604599	0.562019	0.236469	0.301725	0.174339	0.465049	0.392668
0.0139563	0.0126226	0.0119629	0.109643	0.0941311	0.0916627	0.0923054	0.0835889	0.101049	0.0969826	0.188072	0.0985881	0.0791602	0.0958589	0.0531107	0.0708138
0.0372798	0.0409747	0.0437287	0.110829	0.1206	0.108769	0.128994	0.142343	0.206112	0.200605	0.210288	0.123923	0.0493832	0.0264659	0.0368795	0.0344392
0.032663	0.0321594	0.0319476	0.126371	0.132109	0.136535	0.132653	0.20635	0.214194	0.241526	0.257811	0.105375	0.077213	0.0634796	0.0328033	0.0287068
0.0838193	0.0917517	0.0806056	0.132666	0.120349	0.117642	0.11892	0.13626	0.138077	0.195016	0.16503	0.148441	0.147504	0.117865	0.117932	0.0504427
0.0482921	0.0479394	0.0430857	0.10002	0.127816	0.144989	0.134961	0.119498	0.197061	0.190776	0.188805	0.066502	0.0892997	0.2218	0.119221	0.46027
0.0238745	0.0201534	0.0190052	0.051008	0.0994928	0.188484	0.200758	0.244657	0.254051	0.250457	0.0691814	0.0560859	0.0320606	0.0383156	0.0311943	0.082387
0.0447588	0.0330308	0.0323376	0.0740018	0.111153	0.071084	0.0563788	0.183151	0.21371	0.206576	0.0714665	0.0755227	0.0754258	0.0685896	0.0450009	0.0552254
0.0311015	0.0302974	0.0244254	0.0967476	0.120859	0.205011	0.198863	0.208166	0.202401	0.190076	0.213618	0.0885394	0.0923911	0.0649233	0.064641	0.0698436
0.072666	0.0717933	0.0644888	0.153008	0.199486	0.194599	0.258444	0.35844	0.380099	0.332996	0.328252	0.141868	0.140653	0.133574	0.127048	0.139047
0.0383546	0.0340349	0.0397208	0.194328	0.180716	0.162654	0.149404	0.222319	0.228451	0.165197	0.17454	0.0601825	0.0469483	0.0497837	0.0493848	0.0477461
0.0167616	0.0171982	0.0175784	0.0736421	0.0650218	0.115429	0.104337	0.125205	0.14876	0.157995	0.152582	0.0949673	0.1247	0.084106	0.0536587	0.044676
0.0175214	0.0163927	0.0205107	0.0527872	0.0873702	0.116499	0.177082	0.259313	0.285682	0.306952	0.318758	0.0897291	0.0406425	0.0397966	0.152624	0.0431846
0.0129055	0.0136851	0.0155755	0.105094	0.0936961	0.104927	0.104976	0.110173	0.0983588	0.15755	0.131189	0.162702	0.159372	0.206921	0.16966	0.191213
0.0249679	0.0308405	0.0337802	0.0804057	0.0972775	0.195098	0.133092	0.112398	0.138683	0.169374	0.237901	0.145344	0.110837	0.170511	0.0909314	0.124065
0.0219749	0.0190804	0.0306706	0.0335192	0.0564247	0.0350899	0.04822	0.0502439	0.0489668	0.0588345	0.077327	0.0470221	0.0335064	0.0650663	0.0552353	0.043794
0.0209875	0.0187482	0.0193461	0.0540416	0.0927778	0.0882855	0.0739499	0.0824788	0.0761162	0.074725	0.110892	0.108114	0.0456976	0.0534881	0.0546331	0.0646585
0.0511938	0.0517903	0.0555953	0.194753	0.238484	0.299208	0.311425	0.313791	0.464873	0.728556	0.482481	0.469531	0.704111	0.673491	0.487194	0.422645
0.0499872	0.0431201	0.0286607	0.088144	0.101049	0.0781472	0.1203	0.0921845	0.108099	0.180169	0.215819	0.119751	0.164723	0.114258	0.0777984	0.0943615
0.0941602	0.0839764	0.0892444	0.194434	0.13181	0.120047	0.105238	0.0967947	0.0996425	0.102651	0.123408	0.134961	0.134116	0.121073	0.210056	0.198821
0.00906145	0.00834357	0.00806455	0.0236437	0.0254612	0.0439372	0.0134198	0.013461	0.0172976	0.0171344	0.0155861	0.0128199	0.0260642	0.017314	0.0143127	0.0845205
0.0382275	0.036756	0.0425916	0.25318	0.252742	0.19888	0.24383	0.271209	0.281099	0.237506	0.18778	0.157975	0.125136	0.139719	0.190108	0.297782
0.0174428	0.0218256	0.0237335	0.0988959	0.128356	0.115464	0.168174	0.201134	0.0883871	0.0760648	0.106778	0.172877	0.0338788	0.0703988	0.085281	0.116404
0.0226012	0.0305802	0.0295313	0.133992	0.145449	0.17852	0.270504	0.306866	0.197105	0.195498	0.140955	0.111986	0.0458074	0.0778595	0.0817296	0.129055
0.021964	0.0333274	0.0232644	0.0782743	0.08532	0.0762723	0.0822119	0.0980315	0.175162	0.0792402	0.0441134	0.118679	0.0506607	0.0235774	0.0265007	0.0621232
0.0176169	0.0178855	0.0209549	0.066466	0.0694881	0.0734841	0.0788571	0.0878046	0.153553	0.0670156	0.095541	0.105365	0.0991938	0.127876	0.0884565	0.0983696
0.0184979	0.0223097	0.0226151	0.0950044	0.0870098	0.0973139	0.183675	0.153358	0.117994	0.282894	0.195058	0.142597	0.130934	0.085787	0.12349	0.146637
0.017053	0.0206656	0.0198548	0.0451485	0.0838681	0.0392284	0.0852024	0.107473	0.0955908	0.107997	0.13897	0.0857998	0.0294698	0.0217537	0.0499598	0.0577101
0.026524	0.0357232	0.0309034	0.0684377	0.0686039	0.0532475	0.0363668	0.0594691	0.0787868	0.0627831	0.100813	0.0665408	0.0347579	0.14001	0.0609606	0.121861
0.0274325	0.0274698	0.0408295	0.145083	0.144926	0.13755	0.122712	0.156845	0.143492	0.294447	0.194109	0.254698	0.136489	0.109338	0.100687	0.0663212
0.0562259	0.069525	0.0789515	0.177132	0.168816	0.199001	0.169531	0.397155	0.167287	0.19164	0.163343	0.163056	0.104651	0.101418	0.0676996	0.0715719
0.00325928	0.00153492	0.00227114	0.0581196	0.0536216	0.0638678	0.0428301	0.0371772	0.0495418	0.0610905	0.0203777	0.0169233	0.0464904	0.0185449	0.0254359	0.131546
0.0145624	0.0182446	0.0179223	0.0788889	0.0826151	0.0890937	0.0871387	0.100341	0.154984	0.0719171	0.0698596	0.158866	0.0460757	0.0402367	0.0311492	0.0255858
0.181336	0.173909	0.195519	0.867732	0.878032	1.43098	1.17694	1.13826	1.21609	1.19275	1.11293	1.08206	1.21266	1.2728	1.30467	1.02092
0.0684293	0.0691756	0.0900396	0.201466	0.251062	0.326015	0.321811	0.391835	0.486032	0.500795	0.506932	0.535246	0.505855	0.574423	0.628249	0.695745
0.0108043	0.0103506	0.0157154	0.162235	0.183532	0.294317	0.327501	0.352391	0.389645	0.434961	0.432333	0.422269	0.404342	0.401558	0.434292	0.465829
0.0155138	0.0163016	0.018834	0.114095	0.132996	0.154939	0.154422	0.291487	0.313453	0.326557	0.352196	0.360722	0.357406	0.326282	0.376791	0.362047
0.0163818	0.013588	0.0131829	0.239762	0.249729	0.230038	0.286	0.349901	0.476885	0.507045	0.442778	0.431431	0.416013	0.379084	0.360188	0.361167
0.0123536	0.0122041	0.0108376	0.254253	0.339767	0.371709	0.386942	0.500187	0.554377	0.586731	0.550828	0.609001	0.615182	0.716114	0.818809	0.943959
0.0193302	0.0171866	0.0142407	0.202218	0.20244	0.248357	0.288322	0.320353	0.315219	0.378371	0.385443	0.394737	0.337356	0.352191	0.448309	0.351806
0.0297099	0.0362743	0.0265842	0.203112	0.295907	0.275796	0.357401	0.417754	0.467289	0.496426	0.510552	0.51096	0.422053	0.33354	0.357921	0.448232
0.00992075	0.0111604	0.0133167	0.165179	0.249009	0.258596	0.322923	0.369775	0.387327	0.411961	0.432412	0.438966	0.30479	0.292611	0.259624	0.234306
0.0107074	0.0110061	0.00989559	0.164068	0.146576	0.233605	0.258093	0.429451	0.516708	0.569354	0.616101	0.686291	0.707155	0.492458	0.5184	0.467204
0.0151117	0.0118761	0.0144343	0.178376	0.194421	0.220347	0.304056	0.368452	0.334481	0.32177	0.305662	0.328368	0.275994	0.29577	0.293624	0.29641
0.0218265	0.0177246	0.0144491	0.146011	0.175715	0.221748	0.263624	0.303031	0.389189	0.365643	0.365	0.350323	0.351606	0.31551	0.407417	0.443664
0.0237096	0.0127089	0.01317	0.166972	0.19362	0.22322	0.213885	0.217959	0.215393	0.256393	0.226988	0.303967	0.284023	0.280135	0.29609	0.345802
0.0052445	0.00438911	0.00383091	0.155295	0.211263	0.289979	0.300022	0.34947	0.471285	0.540598	0.508733	0.406361	0.367059	0.287054	0.427019	0.478864
0.032501	0.032311	0.0349498	0.296473	0.387949	0.433845	0.485041	0.497543	0.515096	0.554442	0.569273	0.697986	0.662196	0.732532	0.875029	0.963949
0.047194	0.0499456	0.0647237	0.261342	0.287765	0.307644	0.327632	0.353978	0.361707	0.383036	0.420181	0.464989	0.464402	0.462306	0.48992	0.615248
0.0187746	0.041428	0.0427587	0.261137	0.272057	0.294874	0.282155	0.300996	0.311608	0.333333	0.356923	0.402741	0.408055	0.456228	0.580328	0.599452
0.0641391	0.0600373	0.0598154	0.363053	0.362366	0.393415	0.37854	0.355728	0.408743	0.432132	0.440903	0.466781	0.473623	0.455394	0.515281	0.543841
0.0401379	0.0465427	0.0453877	0.297093	0.32327	0.350173	0.357931	0.33949	0.384415	0.410183	0.417174	0.472969	0.494345	0.484485	0.515598	0.543713
0.0419525	0.0461564	0.0488667	0.228077	0.278572	0.328108	0.341807	0.37003	0.36209	0.400094	0.43263	0.469654	0.477602	0.513293	0.582852	0.811161
0.0383652	0.0413129	0.0464652	0.19282	0.193764	0.225244	0.227997	0.214139	0.231771	0.249542	0.262681	0.259742	0.262869	0.29127	0.303915	0.356164
0.0530161	0.0456713	0.0439484	0.187915	0.206939	0.225019	0.237338	0.204846	0.27113	0.279999	0.289602	0.470045	0.295625	0.312694	0.348007	0.56073
0.101335	0.10556	0.116526	0.378829	0.382439	0.385803	0.369037	0.373658	0.396151	0.388973	0.438031	0.493867	0.525184	0.580908	0.668211	0.773886
0.0357697	0.0359454	0.0418947	0.281421	0.298991	0.347937	0.363476	0.35245	0.376489	0.467692	0.525129	0.592619	0.605982	0.679892	0.753443	0.978215
0.0293785	0.0390967	0.0408149	0.4439	0.391277	0.391929	0.428927	0.464631	0.492352	0.527094	0.562676	0.591098	0.651848	0.597314	0.728351	1.03593
0.0139608	0.0163002	0.013582	0.125388	0.199363	0.258613	0.43911	0.633274	0.719131	0.808882	0.8378	0.791677	0.853686	0.945165	1.05866	1.00559
0.0149398	0.0157838	0.0242333	0.0653358	0.0887297	0.0928413	0.10125	0.128348	0.126826	0.134562	0.196716	0.181765	0.462135	0.268901	0.281796	0.176599
0.0235632	0.0261522	0.0325015	0.103799	0.129895	0.129125	0.191059	0.204847	0.326431	0.319985	0.384429	0.476757	0.544501	0.657664	0.605978	0.482925
0.00854744	0.00698856	0.00876316	0.0874	0.136642	0.228186	0.339578	0.272492	0.338582	0.386959	0.330163	0.350112	0.303063	0.204885	0.3768	0.293281
0.0318244	0.0322233	0.0267999	0.0658281	0.0672677	0.066387	0.0812259	0.153928	0.195564	0.179091	0.142367	0.306537	0.354686	0.345728	0.28485	0.267238
0.0339787	0.0272681	0.0277817	0.0650601	0.0741834	0.276753	0.125495	0.172615	0.265574	0.26244	0.287678	0.32021	0.411164	0.798185	0.833164	0.711117
0.0218077	0.0214745	0.021895	0.170087	0.288845	0.419072	0.664926	0.523423	0.544432	0.556752	0.560806	0.658389	1.62087	0.99374	1.1757	1.38508
0.0170674	0.013362	0.0166843	0.0852822	0.41167	0.446619	0.543785	0.5779	0.63771	0.718199	0.662312	0.895436	0.965665	0.818032	0.620731	0.808158
0.00484871	0.00660091	0.00550856	0.119804	0.144967	0.185761	0.210091	0.282945	0.375196	0.401689	0.295812	0.259299	0.302986	0.334283	0.362259	0.387901
0.034962	0.0361439	0.0398555	0.161276	0.180628	0.248654	0.25721	0.309591	0.70515	0.713356	1.03201	0.853664	0.868265	0.743597	0.497857	0.986083
0.0128256	0.00918281	0.0143856	0.195659	0.1832	0.278574	0.301597	0.305511	0.409976	0.471015	0.431191	0.486712	0.689628	0.719553	0.605479	0.515386
0.0151954	0.0192354	0.0147294	0.0863457	0.0922685	0.179954	0.179959	0.209906	0.237664	0.190517	0.219223	0.17687	0.120721	0.171676	0.106893	0.0771336
0.0068391	0.0414327	0.0443801	0.322342	0.436686	0.805211	0.902875	0.880046	1.08754	1.25423	1.48458	1.4541	1.91833	1.93757	1.82459	1.4138
0.0176522	0.0158039	0.0218531	0.0580777	0.140368	0.219215	0.251136	0.285579	0.331536	0.393688	0.400837	0.506113	0.514473	0.560717	0.549102	0.47693
0.0272769	0.0325669	0.033762	0.200768	0.29976	0.365091	0.454998	0.559376	0.679641	0.675701	0.705425	0.69499	0.689196	0.885003	0.863531	0.743227
0.0101494	0.00837736	0.0101095	0.0409755	0.0311959	0.0419745	0.069289	0.138258	0.13111	0.191241	0.163168	0.302607	0.25551	0.46665	0.408466	0.3308
0.0270463	0.0258075	0.0294162	0.120208	0.126274	0.127179	0.133697	0.131879	0.153569	0.184371	0.180451	0.178983	0.181458	0.280004	0.37008	0.306551
0.0351743	0.0389977	0.0470705	0.13625	0.125262	0.158789	0.130161	0.133766	0.189011	0.229503	0.243843	0.260098	0.237858	0.218354	0.146606	0.123317
0.0246817	0.0340516	0.0338262	0.131404	0.128733	0.139724	0.138255	0.144503	0.146665	0.155197	0.155554	0.143828	0.124158	0.190779	0.206174	0.170075
0.0330377	0.0399011	0.0416928	0.0862378	0.0771369	0.0989902	0.129324	0.0752916	0.111169	0.140395	0.0942014	0.0909733	0.112204	0.144462	0.35016	0.418201
0.0312174	0.0311468	0.0292673	0.110533	0.101383	0.133378	0.143874	0.137986	0.15657	0.19378	0.233218	0.166165	0.135481	0.155235	0.143618	0.0934875
0.0192517	0.0266678	0.0260317	0.129211	0.125517	0.120544	0.132531	0.157843	0.156598	0.17684	0.184435	0.201679	0.199197	0.19724	0.173466	0.158189
0.0130053	0.0175011	0.0189005	0.0960449	0.127443	0.12567	0.12591	0.145787	0.153108	0.179068	0.175769	0.161362	0.143984	0.216918	0.126438	0.116225
0.0336172	0.0383012	0.0360883	0.105631	0.147656	0.16663	0.149824	0.150859	0.194602	0.23682	0.297124	0.332974	0.294134	0.393657	0.375253	0.499739
0.0579704	0.0509844	0.0508124	0.468011	0.534416	0.483251	0.465852	0.48002	0.490329	0.54255	0.531156	0.535956	0.561993	0.553626	0.595981	0.641088
0.0207927	0.0182296	0.0196723	0.145479	0.135276	0.178569	0.161733	0.138281	0.149261	0.162385	0.215501	0.205009	0.232843	0.451378	0.519124	0.607166
0.0258594	0.0191094	0.0192191	0.0954739	0.100753	0.118643	0.127454	0.137114	0.151691	0.167841	0.154305	0.337683	0.222342	0.469614	0.31499	0.501587
0.0361622	0.0335381	0.0360083	0.071583	0.0853377	0.0803348	0.16307	0.184091	0.213775	0.305425	0.346481	0.419712	0.449455	0.540899	0.647024	0.772247
0.0294594	0.0284904	0.0286634	0.07206	0.0815731	0.0725675	0.0757317	0.0939419	0.116872	0.238511	0.266849	0.272348	0.280769	0.316459	0.430156	0.563595
0.0295522	0.0318634	0.0338357	0.0993335	0.0919165	0.0968658	0.170527	0.170672	0.173053	0.24501	0.209027	0.27761	0.25808	0.248157	0.239384	0.27178
0.0192997	0.0206431	0.0156416	0.110944	0.124892	0.151011	0.0909285	0.0996502	0.120765	0.322185	0.3796	0.453148	0.411448	0.690868	0.710812	1.09145
0.0395714	0.036232	0.0364662	0.0768414	0.0884472	0.120313	0.0894582	0.0937801	0.0993314	0.270517	0.330838	0.422439	0.571313	0.734488	0.793032	0.792473
0.0306027	0.0243145	0.0275857	0.0609013	0.115382	0.118759	0.12931	0.138806	0.156244	0.264103	0.396785	0.509907	0.554454	0.82919	0.996669	0.938278
0.0214239	0.0215403	0.0239684	0.0993706	0.131713	0.117858	0.128091	0.126213	0.117292	0.198999	0.271191	0.319511	0.261134	0.29402	0.417763	0.548949
0.0178704	0.0209143	0.0278867	0.0868708	0.115246	0.11402	0.107213	0.113257	0.116173	0.493522	0.528431	0.566066	0.505696	0.541672	0.66109	0.619079
0.0305129	0.0256103	0.0364842	0.10649	0.139915	0.142511	0.13568	0.146908	0.21908	0.254911	0.301812	0.447781	0.459978	0.602581	0.74492	0.862263
0.0117756	0.0129942	0.0122405	0.207885	0.225762	0.210614	0.174276	0.243704	0.236786	0.323914	0.31078	0.307302	0.241155	0.350068	0.376179	0.569256
0.0188959	0.0197857	0.0171023	0.158092	0.149339	0.157026	0.158899	0.171459	0.210641	0.208036	0.166331	0.188139	0.181511	0.180353	0.267834	0.457225
0.0575811	0.0533911	0.0407316	0.14624	0.148106	0.15139	0.168738	0.196245	0.224389	0.247067	0.20495	0.241954	0.238694	0.204485	0.217576	0.423053
0.0225308	0.0215047	0.0203171	0.0747655	0.076645	0.102948	0.113573	0.111181	0.11243	0.097196	0.0958169	0.0614573	0.0780115	0.09181	0.116938	0.219315
0.0136796	0.0132127	0.0151055	0.122953	0.11958	0.142518	0.243923	0.259049	0.248763	0.263932	0.277269	0.289177	0.33659	0.331338	0.370086	0.390118
0.0159257	0.0187401	0.0172819	0.179215	0.178316	0.204752	0.233448	0.258436	0.313476	0.347694	0.279559	0.267013	0.321239	0.336476	0.326486	0.380972
0.0154424	0.0170038	0.0196279	0.149291	0.170369	0.174744	0.207352	0.198399	0.212647	0.222728	0.212331	0.200191	0.178359	0.155472	0.151929	0.198918
0.0204743	0.0205648	0.0197671	0.101068	0.100613	0.106021	0.136926	0.109567	0.138668	0.14299	0.128859	0.128421	0.180108	0.105563	0.0925834	0.127328
0.0197238	0.0203586	0.023159	0.134107	0.176971	0.129816	0.137112	0.119797	0.133996	0.138876	0.131694	0.130491	0.103253	0.116633	0.0877824	0.150886
0.0371231	0.0275847	0.0279557	0.108649	0.114667	0.119112	0.127794	0.111549	0.149323	0.153846	0.146586	0.0742411	0.0461321	0.0607788	0.045277	0.0923938
0.0158535	0.0221581	0.0213491	0.172619	0.170944	0.157692	0.150584	0.155	0.231437	0.173892	0.181411	0.0999392	0.116063	0.0780838	0.0648179	0.0523284
0.0255205	0.0270728	0.0276765	0.0821378	0.0640941	0.0960582	0.121213	0.133536	0.147537	0.22039	0.162094	0.272899	0.203086	0.16399	0.40665	0.380046
0.0109154	0.0113597	0.0127389	0.108358	0.0970222	0.0990042	0.154468	0.155602	0.199987	0.195999	0.235854	0.223557	0.253415	0.369277	0.385973	0.533077
0.179389	0.139915	0.0139005	0.0725552	0.0760345	0.0869075	0.0855869	0.081103	0.107366	0.154877	0.154156	0.0774842	0.0851994	0.168681	0.114298	0.197315
0.00687939	0.00754849	0.00925082	0.185184	0.203949	0.218687	0.288733	0.266548	0.297725	0.339888	0.346718	0.406584	0.39844	0.427876	0.350097	0.429352
0.0126618	0.0137163	0.0217052	0.076289	0.0577774	0.0725487	0.091349	0.100405	0.101215	0.119407	0.124402	0.13642	0.140095	0.205961	0.335614	0.468938
0.0162422	0.0140552	0.0161462	0.165497	0.15015	0.166791	0.235213	0.204032	0.275157	0.278381	0.213874	0.244272	0.267674	0.369382	0.356637	0.546641
0.0194943	0.0156124	0.0191463	0.121003	0.125041	0.131638	0.131563	0.141931	0.154061	0.162122	0.163177	0.158135	0.177261	0.175821	0.222023	0.282373
0.00954487	0.00969976	0.00902039	0.149092	0.160192	0.183359	0.142662	0.220604	0.231648	0.239671	0.257936	0.256236	0.244252	0.315923	0.409674	0.516042
0.0174747	0.0173442	0.0182556	0.139802	0.12437	0.133888	0.124958	0.150153	0.166025	0.170977	0.171576	0.128856	0.166595	0.187681	0.242794	0.245512
0.0277041	0.0239659	0.0232507	0.166583	0.18166	0.195701	0.18784	0.223677	0.229696	0.244552	0.233841	0.205059	0.206469	0.192057	0.195431	0.213656
0.0361976	0.040705	0.0417109	0.133481	0.117575	0.148799	0.140546	0.15966	0.185764	0.194457	0.184747	0.160712	0.158718	0.148555	0.12352	0.166679
0.0136725	0.0147015	0.0137347	0.183358	0.16691	0.190336	0.21675	0.170356	0.182347	0.206048	0.208363	0.160889	0.235956	0.360232	0.3762	0.386258
0.0184769	0.018768	0.0162067	0.147055	0.14405	0.218074	0.225639	0.225776	0.211616	0.224522	0.223953	0.173306	0.151431	0.156905	0.17898	0.173741
0.0209157	0.0206727	0.0346013	0.106147	0.137578	0.104585	0.118871	0.129086	0.12877	0.140198	0.148652	0.141512	0.164669	0.204676	0.306671	0.362093
0.0159164	0.0176556	0.0315362	0.101427	0.0983852	0.108981	0.0989831	0.102937	0.122591	0.153854	0.200577	0.128526	0.119203	0.190735	0.228452	0.259177
0.0185649	0.0169804	0.0220102	0.0667469	0.081979	0.0681593	0.0659814	0.0757882	0.0747186	0.109641	0.119427	0.0903964	0.108288	0.113584	0.377653	0.352877
0.00888398	0.0144399	0.0128595	0.125285	0.164136	0.170858	0.185964	0.186715	0.198293	0.21501	0.23119	0.151114	0.156638	0.198443	0.246217	0.356704
0.0116979	0.0128533	0.0168073	0.126096	0.17482	0.168336	0.180484	0.195821	0.221534	0.245565	0.247577	0.215228	0.227017	0.249377	0.2793	0.315803
0.0196123	0.0192946	0.0223203	0.0915666	0.0978966	0.103973	0.108455	0.12112	0.133531	0.130697	0.134558	0.106536	0.0976697	0.247655	0.293106	0.318811
0.0234878	0.0233992	0.0239653	0.0980221	0.0904256	0.0982672	0.106243	0.112127	0.130829	0.111962	0.11485	0.106452	0.10606	0.10118	0.0959504	0.0874184
0.0151729	0.0164904	0.0152417	0.0959128	0.0986053	0.0955536	0.1127	0.107759	0.167052	0.170273	0.139397	0.129248	0.114835	0.137126	0.145069	0.136451
0.0224749	0.0235632	0.0251957	0.145323	0.133534	0.157186	0.171138	0.172288	0.203604	0.216359	0.212121	0.182647	0.213346	0.261122	0.2585	0.259613
0.0334816	0.0374888	0.0414975	0.229536	0.217347	0.219699	0.210272	0.225795	0.257989	0.349086	0.56503	0.625266	0.725466	0.842563	0.905264	1.08752
0.0161524	0.0171906	0.0187517	0.0191566	0.0192429	0.0219563	0.152727	0.159618	0.16386	0.150583	0.163127	0.198518	0.311623	0.211173	0.297903	0.274392
0.0113418	0.0146431	0.0157031	0.117398	0.100032	0.124546	0.133337	0.241222	0.266271	0.29235	0.299012	0.269652	0.237708	0.261621	0.265868	0.30301
0.0174876	0.0214482	0.023672	0.0249408	0.0741851	0.0703233	0.0684387	0.170078	0.189278	0.228679	0.261988	0.332694	0.505759	0.501644	0.47263	0.379901
0.0130462	0.0140118	0.0160452	0.212523	0.202355	0.179914	0.186917	0.171562	0.191304	0.223245	0.214181	0.405226	0.369026	0.372294	0.34856	0.371143
0.0183014	0.0266156	0.0240823	0.122172	0.12194	0.119158	0.117723	0.130831	0.182185	0.165951	0.600385	0.595813	0.560123	0.565785	0.701308	0.561847
0.0209977	0.0191195	0.0381394	0.101913	0.0915527	0.0833148	0.0828	0.130375	0.139688	0.162472	0.0854014	0.110697	0.375787	0.478508	0.298816	0.128044
0.00650924	0.00831478	0.00725489	0.100933	0.098355	0.109516	0.0984974	0.103025	0.13559	0.178005	0.215582	0.346153	0.382308	0.3793	0.388827	0.4188
0.0201946	0.0229298	0.0264011	0.125166	0.107544	0.138479	0.132502	0.14795	0.2113	0.211618	0.255927	0.535246	0.606137	0.605718	0.553751	0.487818
0.0222481	0.0318453	0.0400573	0.107717	0.150229	0.203783	0.242247	0.27909	0.308899	0.370493	0.377967	0.428601	0.452528	0.435736	0.462176	0.418162
0.0149756	0.0175146	0.0207559	0.156169	0.139926	0.205257	0.185517	0.206285	0.236797	0.238284	0.254944	0.293184	0.337566	0.309185	0.382452	0.415166
0.00695872	0.00927125	0.0134659	0.115092	0.123952	0.133398	0.144724	0.158941	0.183635	0.216938	0.211514	0.272738	0.219367	0.160657	0.149141	0.139501
0.0265812	0.0229555	0.0218849	0.342033	0.318196	0.287911	0.293102	0.274503	0.261657	0.282735	0.286997	0.284051	0.263027	0.287185	0.328872	0.425503
0.0174374	0.016427	0.0134817	0.15068	0.19539	0.264779	0.164495	1.99629	0.174642	0.197278	0.203187	0.327274	0.265542	0.474425	0.669873	0.861315
0.0153855	0.0218625	0.0184563	0.230766	0.220608	0.251656	0.246195	0.198035	0.169589	0.216913	0.164132	0.155205	0.178269	0.349183	0.537088	0.575403
0.014405	0.0157904	0.0197301	0.0647974	0.0674842	0.0684923	0.0875074	0.0717582	0.0766051	0.088562	0.0822141	0.0808895	0.0751415	0.110908	0.145389	0.154471
0.0159826	0.0220501	0.0200727	0.0767587	0.0786544	0.107592	0.0863205	0.0715588	0.0628542	0.0879174	0.0962659	0.132841	0.141643	0.10656	0.189639	0.221989
0.0124172	0.0126011	0.0170439	0.121222	0.115841	0.12335	0.116646	0.128834	0.133287	0.133245	0.132471	0.126814	0.176257	0.174884	0.243992	0.307339
0.0111422	0.0125203	0.0136771	0.0534786	0.0556446	0.0695028	0.0693029	0.0763698	0.0719106	0.0898127	0.0910207	0.0866034	0.078759	0.176612	0.243291	0.271374
0.023311	0.0322691	0.0266576	0.0840556	0.129418	0.0931577	0.0897812	0.100019	0.147912	0.106058	0.0903861	0.0681036	0.0983778	0.118925	0.14313	0.25058
0.0197325	0.0266318	0.0289105	0.154134	0.177145	0.0786656	0.0995122	0.109005	0.126505	0.16137	0.165751	0.14452	0.14814	0.158599	0.218161	0.269794
0.0241268	0.0269087	0.0283683	0.0900685	0.0969823	0.1079	0.110545	0.113085	0.103077	0.131797	0.132052	0.152767	0.152816	0.254984	0.289054	0.36946
0.0205526	0.0199293	0.0246048	0.174029	0.195732	0.228313	0.215186	0.220978	0.230803	0.236401	0.238174	0.227662	0.22363	0.200244	0.327033	0.377599
0.0253361	0.0241071	0.0250337	0.0291956	0.023448	0.0913405	0.130262	0.102023	0.0826508	0.127762	0.0779117	0.0860674	0.061901	0.0845156	0.166267	0.224954
0.010885	0.0142271	0.0154534	0.07846	0.070526	0.0692602	0.0931514	0.0835944	0.100513	0.109227	0.104712	0.0997449	0.137724	0.312864	0.367773	0.528899
0.0602336	0.0467228	0.0433565	0.297625	0.319156	0.354143	0.297144	0.178936	0.384589	0.351431	0.337114	0.489872	0.577848	0.796427	0.715968	1.0324
0.0401835	0.0329233	0.0288446	0.733651	0.700464	0.9652	1.04203	0.61263	0.610993	0.917099	0.591183	1.22448	2.07014	1.56436	2.29123	2.03671
0.0783481	0.086416	0.066818	0.23218	0.302461	0.383137	0.471489	0.522823	0.587273	0.729697	0.670438	1.41366	1.58266	1.69349	1.56178	1.42278
0.0305915	0.02874	0.0305269	0.123221	0.118272	0.127478	0.119862	0.194851	0.168083	0.168305	0.122207	0.18284	0.280523	0.209275	0.158416	0.236901
0.102399	0.0783784	0.0686267	0.204537	0.18239	0.174414	0.200594	0.196001	0.254528	0.233514	0.206622	0.378238	0.405051	0.492227	0.550297	0.912989
0.0343711	0.0162679	0.0207711	0.132671	0.195047	0.208448	0.208504	0.24466	0.289142	0.248259	0.217631	0.46659	0.397171	0.480896	0.342091	0.689105
0.0635627	0.0541633	0.0497902	0.116006	0.107172	0.154848	0.167551	0.200212	0.194552	0.198742	0.553573	0.560316	0.602337	0.454765	0.749064	0.359889
0.0386541	0.0341857	0.042864	0.157054	0.137502	0.174509	0.162095	0.18269	0.325786	0.15811	0.16985	0.4244	0.338792	0.575751	0.741875	0.587152
0.0248124	0.0219808	0.027445	0.0932871	0.126314	0.167993	0.206583	0.252948	0.215544	0.207721	0.658733	0.630395	0.639453	0.674759	0.540412	0.602966
0.0209603	0.0276324	0.0195512	0.0870035	0.0770924	0.100656	0.0854479	0.13757	0.111761	0.122872	0.157268	0.295225	0.444822	0.536602	0.64808	0.194713
0.0555787	0.0181333	0.0147496	0.28945	0.252246	0.310371	0.187992	0.383007	0.370069	0.310212	0.239795	0.49137	0.409177	0.44787	0.475256	0.267484
0.0268462	0.0223131	0.025938	0.214322	0.283425	0.305412	0.363375	0.382628	0.448927	0.400139	0.455876	0.55007	0.870585	1.28555	1.12998	1.07475
0.0344973	0.0521125	0.0515566	0.1696	0.172577	0.167942	0.190376	0.210604	0.287796	0.263867	0.247421	0.356469	0.391263	0.409687	0.457922	0.489317
0.0255243	0.0252925	0.0262289	0.132939	0.119708	0.128056	0.124906	0.136941	0.147774	0.115595	0.0989946	0.142623	0.153664	0.146029	0.204937	0.30719
0.0179887	0.015712	0.0198526	0.0576991	0.0500829	0.0539654	0.0413433	0.0559161	0.0850168	0.0629367	0.0638161	0.0970326	0.178848	0.137088	0.0992922	0.14275
0.010422	0.0145256	0.0126851	0.0443588	0.0418446	0.0489583	0.0294018	0.0670768	0.0526708	0.0491582	0.0289481	0.0328095	0.0595356	0.0583044	0.107759	0.113868
0.0281308	0.0417027	0.0475882	0.225339	0.232505	0.249001	0.211508	0.233507	0.263993	0.204744	0.219131	0.252801	0.202642	0.277804	0.317545	0.387185
0.0347999	0.0439998	0.0445368	0.0515533	0.0625622	0.0831716	0.121992	0.173982	0.191311	0.191841	0.198273	0.223914	0.359888	0.272408	0.366849	0.495324
0.0176703	0.0260775	0.0374224	0.0922086	0.0970956	0.104627	0.0792857	0.111385	0.210287	0.0734165	0.0634541	0.317368	0.20242	0.142156	0.125169	0.178372
0.0211644	0.0299644	0.0282691	0.0779657	0.0422466	0.0541483	0.0473595	0.077635	0.117949	0.0410876	0.0328064	0.0766238	0.16811	0.0956793	0.176398	0.145071
0.0360642	0.0511394	0.0590091	0.227851	0.217879	0.224206	0.28548	0.280451	0.289352	0.298971	4.14735	0.510361	0.370407	0.446899	0.366305	0.464458
0.0262202	0.0257826	0.0270414	0.159615	0.185532	0.158987	0.157916	0.172042	0.205866	0.22148	0.230159	0.170729	0.139461	0.156435	0.194961	0.23667
0.027095	0.0226473	0.0222388	0.148201	0.154234	0.153615	0.158981	0.136613	0.175474	0.204641	0.188679	0.156803	0.167533	0.14999	0.126956	0.180406
0.0343914	0.0332636	0.0354191	0.138919	0.141287	0.169413	0.172188	0.197541	0.212172	0.259321	0.249807	0.171928	0.173738	0.125045	0.13286	0.129634
0.0129895	0.0128767	0.0135717	0.057608	0.0574072	0.0439104	0.0463332	0.120436	0.204893	0.249065	0.236698	0.141454	0.0872029	0.0860097	0.205361	0.146509
0.0144541	0.0206475	0.017231	0.0885302	0.0812416	0.0773658	0.0528704	0.0826243	0.262654	0.331852	0.311525	0.0486614	0.237749	0.276491	0.375884	0.178478
0.00732821	0.0081286	0.00560142	0.0294456	0.0311997	0.0477221	0.0422888	0.0574954	0.109574	0.160393	0.246002	0.107761	0.0962519	0.0449153	0.0569876	0.0569615
0.0131123	0.0127481	0.0113436	0.0283955	0.0344441	0.0410983	0.0420039	0.038104	0.159347	0.177327	0.187622	0.255711	0.166091	0.0756136	0.100506	0.0945059
0.00497481	0.00259895	0.00279041	0.053932	0.0281286	0.0288989	0.028495	0.0557212	0.0839686	0.13547	0.132879	0.134569	0.0442448	0.0295698	0.0469794	0.133967
0.00686953	0.00839298	0.0100467	0.0361236	0.0629955	0.0512516	0.0686701	0.100898	0.158155	0.179447	0.14897	0.155851	0.143626	0.12674	0.11403	0.109577
0.0179945	0.0176478	0.0152911	0.0512539	0.0647059	0.0879957	0.0985286	0.118013	0.27239	0.279251	0.338618	0.2474	0.116753	0.202232	0.199293	0.0652211
0.0179954	0.0189254	0.0233118	0.0879395	0.0940571	0.122819	0.118792	0.172787	0.338872	0.303705	0.356569	0.249441	0.220594	0.238654	0.207551	0.176359
0.0360013	0.0335815	0.0431914	0.123924	0.143528	0.154662	0.138201	0.177865	0.276796	0.325414	0.326642	0.245326	0.191972	0.165951	0.14327	0.0933713
0.0204535	0.0184071	0.0194636	0.0369687	0.0576986	0.0815742	0.0759963	0.119989	0.228546	0.294781	0.298674	0.121912	0.0771502	0.0381502	0.0338527	0.0274312
0.0174002	0.0147556	0.0254602	0.098718	0.125113	0.130801	0.120601	0.155882	0.219847	0.231788	0.257494	0.246506	0.131963	0.12156	0.0947573	0.103934
0.0147027	0.0109839	0.0198786	0.128986	0.136536	0.137514	0.162011	0.190089	0.1962	0.213489	0.095319	0.071293	0.223923	0.0757095	0.165474	0.141722
0.0275735	0.0229066	0.0271827	0.243468	0.418174	0.66484	0.762007	0.750824	0.762443	0.76685	0.80327	0.852737	0.876194	0.520758	0.523202	2.10117
0.0381633	0.0353527	0.038802	0.268072	0.29682	0.238199	0.225811	0.250099	0.261542	0.305395	0.267586	0.290565	0.290976	0.304138	0.336827	0.335647
0.0222626	0.023136	0.0256755	0.186302	0.218001	0.205761	0.192696	0.21447	0.234506	0.22615	0.252163	0.36123	0.37965	0.383433	0.476254	0.621706
0.0348508	0.0332172	0.0350626	0.112748	0.124391	0.112633	0.10736	0.10622	0.14904	0.21203	0.300241	0.301677	0.151163	0.145617	0.25229	0.408011
0.0665735	0.0683437	0.069638	0.161271	0.134257	0.149502	0.144755	0.168091	0.163249	0.188792	0.235276	0.182731	0.14026	0.118619	0.106466	0.147564
0.0273191	0.0201818	0.0233454	0.0535285	0.065123	0.0826068	0.0913671	0.0784023	0.0908435	0.211551	0.202059	0.260061	0.255616	0.19624	0.179024	0.249356
0.0171384	0.0175045	0.0205303	0.121654	0.199873	0.139096	0.101132	0.139804	0.178011	0.181963	0.238789	0.163402	0.119404	0.107648	0.0990755	0.147402
0.0291024	0.023729	0.0207189	0.268628	0.231254	0.169417	0.198747	0.226404	0.306078	0.382545	0.485078	0.274364	0.27509	0.295573	1.1087	0.502717
0.0392244	0.042634	0.0393437	0.12271	0.156449	0.239093	0.15873	0.179538	0.178574	0.223364	0.21966	0.172357	0.172997	0.134227	0.110145	0.0955839
0.0126597	0.0196044	0.0272267	0.0874255	0.0736843	0.0994732	0.086667	0.082704	0.106578	0.120633	0.0960158	0.0915254	0.0984876	0.0834139	0.10863	0.15419
0.0221729	0.0205231	0.0268846	0.0505324	0.0571395	0.0505808	0.044779	0.0496441	0.0672575	0.0614302	0.0773013	0.139507	0.0872948	0.126943	0.118951	0.111996
0.032283	0.03707	0.0317655	0.110603	0.104606	0.138365	0.14374	0.132835	0.138646	0.139841	0.152154	0.142035	0.0889388	0.129514	0.0624422	0.0539775
0.0347134	0.0344794	0.0347828	0.082361	0.0975335	0.102379	0.0980039	0.100128	0.0998932	0.102503	0.0859136	0.117141	0.0934964	0.0777151	0.0975457	0.0741904
0.0253561	0.025457	0.0288038	0.165903	0.127442	0.172563	0.177792	0.188466	0.20687	0.225885	0.211025	0.204816	0.169801	0.158351	0.0936699	0.206495
0.0130066	0.0138032	0.0145495	0.0363011	0.0462827	0.047631	0.0521011	0.0589031	0.0774106	0.0862367	0.0841006	0.0967667	0.0751606	0.0520621	0.0555572	0.07808
0.0299512	0.0300971	0.0270981	0.0890047	0.089257	0.0933898	0.0890011	0.094344	0.109911	0.11116	0.107758	0.119029	0.115405	0.102838	0.0911918	0.0840891
0.0102982	0.0128707	0.0136286	0.107924	0.116867	0.124843	0.121492	0.143381	0.175664	0.175958	0.149414	0.12486	0.0990629	0.116356	0.187598	0.308136
0.0111152	0.0143226	0.0200478	0.0614401	0.0865499	0.0740984	0.063884	0.0702619	0.0743148	0.0863446	0.0806442	0.072864	0.0673987	0.0970381	0.0769732	0.0498768
0.0251891	0.0330994	0.045728	0.102717	0.135571	0.12068	0.112386	0.119542	0.132812	0.151031	0.139272	0.162623	0.161532	0.1181	0.0764998	0.0848276
0.0401348	0.0496586	0.0631929	0.171089	0.215079	0.146861	0.148741	0.35336	0.647603	0.302869	0.729497	0.487267	0.172795	0.263417	0.237268	0.385649
0.0458942	0.0433396	0.0425123	0.319006	0.334368	0.296922	0.321576	0.365317	0.387395	0.449012	0.495557	0.503379	0.546667	0.470729	0.652355	0.704389
0.023826	0.0190797	0.0182732	0.104307	0.112084	0.12342	0.123524	0.128043	0.133879	0.137511	0.129238	0.275477	0.37523	0.420507	0.402526	0.435253
0.0250019	0.0303748	0.0757862	0.107357	0.136535	0.15268	0.15355	0.217912	0.222111	0.205431	0.189291	0.174654	0.255073	0.283469	0.300959	0.31476
0.0644717	0.0565859	0.0512376	0.18857	0.198034	0.202602	0.226987	0.255016	0.248513	0.242916	0.23455	0.28367	0.277465	0.328453	0.416753	0.475595
0.0353133	0.044774	0.0362466	0.168158	0.227231	0.234496	0.209162	0.320173	0.322326	0.356363	0.338584	0.364644	0.352501	0.347761	0.345839	0.291309
0.0618524	0.0616636	0.017227	0.12153	0.122007	0.151193	0.230189	0.231489	0.216182	0.193114	0.140869	0.106469	0.106083	0.114049	0.109933	0.0839698
0.0180742	0.0165999	0.0146044	0.0815165	0.0839166	0.0990419	0.143895	0.124585	0.187506	0.162291	0.122299	0.144571	0.144583	0.142928	0.0732806	0.0647233
0.0262885	0.0260982	0.0307791	0.0990063	0.0755917	0.139307	0.173349	0.144772	0.165781	0.189275	0.212497	0.226368	0.236538	0.409592	0.266256	0.193749
0.0937973	0.0809866	0.0755531	0.17306	0.174528	0.196317	0.339527	0.386932	0.239223	0.264301	0.256088	0.254216	0.247382	0.246482	0.227676	0.164571
0.0444521	0.0416445	0.0529204	0.133762	0.111827	0.151723	0.1289	0.220745	0.209844	0.193689	0.15384	0.172386	0.155138	0.123662	0.115452	0.0735588
0.110167	0.144366	0.115426	0.322221	0.309049	0.282164	0.317505	0.380669	0.323079	0.358665	0.304004	0.311969	0.340425	0.297985	0.30562	0.212812
0.0703228	0.072632	0.0803162	0.162391	0.10875	0.0978313	0.14859	0.185256	0.109157	0.144102	0.133857	0.130645	0.098726	0.102142	0.108505	0.122398
0.0141623	0.0147385	0.0127368	0.133558	0.106117	0.13979	0.134352	0.135065	0.135821	0.161699	0.245539	0.438552	0.439148	0.606066	0.577608	0.373255
0.0244474	0.023878	0.0288171	0.0875134	0.11232	0.127037	0.118838	0.118792	0.138124	0.132402	0.1514	0.215752	0.228589	0.224665	0.212926	0.107746
0.0297536	0.0257822	0.0268803	0.107022	0.109149	0.111684	0.130347	0.109062	0.122081	0.127401	0.14713	0.11188	0.178005	0.195185	0.370027	0.367639
0.0126712	0.0116065	0.0163442	0.0671974	0.0721726	0.0835776	0.0748443	0.0707695	0.0791586	0.077801	0.0622719	0.0543251	0.0843465	0.127131	0.122641	0.0733257
0.018692	0.0168683	0.017825	0.0666773	0.0848044	0.0722199	0.0677794	0.0764452	0.0949126	0.125396	0.178817	0.177778	0.185756	0.170008	0.167148	0.162341
0.0235287	0.0252563	0.0246363	0.11213	0.140976	0.137064	0.137041	0.124482	0.14102	0.149728	0.147914	0.144117	0.149659	0.136518	0.130235	0.177978
0.0463424	0.0456293	0.0433742	0.125954	0.134375	0.142865	0.144284	0.138836	0.123303	0.0976095	0.0878978	0.0863476	0.147379	0.131964	0.0965981	0.109679
0.0399312	0.0369427	0.0664856	0.12364	0.134225	0.152186	0.152396	0.143989	0.151662	0.141364	0.12928	0.134007	0.114143	0.0958577	0.122701	0.101446
0.067896	0.0483789	0.0399681	0.164438	0.185091	0.207701	0.18956	0.166057	0.16899	0.14983	0.170342	0.186947	0.227867	0.16149	0.144511	0.17021
0.0671206	0.0683983	0.0798231	0.162856	0.173983	0.17962	0.18378	0.156012	0.180405	0.174156	0.178858	0.0760389	0.20384	0.180577	0.16072	0.0972002
0.0349153	0.0381099	0.0398296	0.185941	0.205747	0.193405	0.183126	0.168518	0.178991	0.171566	0.158016	0.197339	0.199432	0.271317	0.221637	0.278276
0.00877617	0.00418169	0.00344628	0.051837	0.0548214	0.0679788	0.0597333	0.050778	0.0493784	0.0659984	0.0794037	0.0959777	0.0502578	0.0463616	0.0410854	0.0820848
0.0139139	0.0095797	0.00963217	0.0363007	0.0386265	0.0623879	0.121512	0.0637581	0.0784754	0.0910585	0.126668	0.0904611	0.0709765	0.0813567	0.101461	0.0930588
0.0157523	0.0106458	0.0189517	0.104278	0.115235	0.113104	0.0950889	0.14058	0.153931	0.143059	0.185438	0.146405	0.197396	0.170603	0.121952	0.145556
0.0212005	0.0225084	0.0272849	0.230623	0.223772	0.24669	0.234255	0.250034	0.202144	0.267379	0.211831	0.188074	0.182316	0.200767	0.169112	0.18376
0.0386911	0.0356095	0.0391353	0.0993358	0.142087	0.1183	0.111916	0.115482	0.118036	0.142444	0.191254	0.174138	0.128786	0.158362	0.166263	0.105809
0.0527452	0.0514496	0.0601401	0.187265	0.185157	0.223401	0.15463	0.178401	0.166959	0.184004	0.204048	0.141943	0.21283	0.180336	0.179516	0.19539
0.00768365	0.0082504	0.0122508	0.0754587	0.0699638	0.0886456	0.089698	0.113322	0.0859923	0.11118	0.115551	0.143013	6.30998	0.173591	0.153708	0.16457
0.0735819	0.0719459	0.0860187	0.33925	0.376467	0.338337	0.377838	0.401675	0.435927	0.374477	0.34446	0.279452	0.253144	0.284409	0.270504	0.242284
0.0815676	0.0862724	0.087496	0.237017	0.233057	0.235773	0.13252	0.105675	0.183383	0.183808	0.216015	0.185222	0.180853	0.235034	0.260767	0.222966
0.0582297	0.0137707	0.0707843	0.166959	0.207412	0.179345	0.172282	0.16898	0.19867	0.190954	0.160774	0.147915	0.133406	0.150992	0.0957827	0.0991904
0.0563218	0.0533313	0.0539215	0.176827	0.174206	0.183144	0.159336	0.188777	0.269569	0.259413	0.2553	0.221452	0.151297	0.238173	0.146367	0.156676
0.0157953	0.0141856	0.0242535	0.23892	0.33324	0.413072	0.104508	0.0446215	0.146624	0.170061	0.174895	0.174705	0.120168	0.122304	0.183518	0.151875
0.0313281	0.0183014	0.0164036	0.120925	0.122891	0.182548	0.151087	0.229103	0.281432	0.302656	0.273508	0.217624	0.306007	0.455625	0.518701	0.462773
0.0199139	0.0271825	0.037682	0.0484328	0.0691654	0.0494128	0.0633295	0.0506493	0.095056	0.158297	0.1399	0.136449	0.1348	0.170912	0.308292	0.481487
0.0272191	0.0206912	0.0409569	0.132539	0.192615	0.178219	0.15779	0.202383	0.216425	0.195097	0.213832	0.214398	0.230727	0.27541	0.464124	0.483897
0.0160275	0.010023	0.0218652	0.118665	0.1335	0.203871	0.161846	0.159032	0.150167	0.159819	0.45401	0.335163	0.378411	0.390482	0.43147	0.524087
0.0990035	0.0913596	0.119974	0.251798	0.398586	0.394186	0.371524	0.30244	0.296489	0.373435	0.298614	0.221849	0.224307	0.252578	0.34219	0.332074
0.0173667	0.0148089	0.00959802	0.11646	0.131925	0.238305	0.160603	0.17518	0.231104	0.310002	0.34401	0.334844	0.385006	0.366302	0.329986	0.295423
0.0338958	0.00967009	0.00921277	0.271058	0.191287	0.168106	0.139776	0.149697	0.165004	0.176402	0.165996	0.239201	0.226087	0.224257	0.181174	0.138314

## Sheet: Sheet4
0	2004
2005	2005
2006	2006
2007	2007
2008	2008
2009	2009
2010	2010
2011	2011
2012	2012
2013	2013
2014	2014
2015	2015
2016	2016
2017	2017
2018	2018
2019	2019
0	2004
2005	2005
2006	2006
2007	2007
2008	2008
2009	2009
2010	2010
2011	2011
2012	2012
2013	2013
2014	2014
2015	2015
2016	2016
2017	2017
2018	2018
2019	2019
0	2004
2005	2005
2006	2006
2007	2007
2008	2008
2009	2009
2010	2010
2011	2011
2012	2012
2013	2013
2014	2014
2015	2015
2016	2016
2017	2017
2018	2018
2019	2019
0	2004
2005	2005
2006	2006
2007	2007
2008	2008
2009	2009
2010	2010
2011	2011
2012	2012
2013	2013
2014	2014
2015	2015
2016	2016
2017	2017
2018	2018
2019	2019
0	2004
2005	2005
2006	2006
2007	2007
2008	2008
2009	2009
2010	2010
2011	2011
2012	2012
2013	2013
2014	2014
2015	2015
2016	2016
2017	2017
2018	2018
2019	2019
0	2004
2005	2005
2006	2006
2007	2007
2008	2008
2009	2009
2010	2010
2011	2011
2012	2012
2013	2013
2014	2014
2015	2015
2016	2016
2017	2017
2018	2018
2019	2019
0	2004
2005	2005
2006	2006
2007	2007
2008	2008
2009	2009
2010	2010
2011	2011
2012	2012
2013	2013
2014	2014
2015	2015
2016	2016
2017	2017
2018	2018
2019	2019
0	2004
2005	2005
2006	2006
2007	2007
2008	2008
2009	2009
2010	2010
2011	2011
2012	2012
2013	2013
2014	2014
2015	2015
2016	2016
2017	2017
2018	2018
2019	2019
0	2004
2005	2005
2006	2006
2007	2007
2008	2008
2009	2009
2010	2010
2011	2011
2012	2012
2013	2013
2014	2014
2015	2015
2016	2016
2017	2017
2018	2018
2019	2019
0	2004
2005	2005
2006	2006
2007	2007
2008	2008
2009	2009
2010	2010
2011	2011
2012	2012
2013	2013
2014	2014
2015	2015
2016	2016
2017	2017
2018	2018
2019	2019
0	2004
2005	2005
2006	2006
2007	2007
2008	2008
2009	2009
2010	2010
2011	2011
2012	2012
2013	2013
2014	2014
2015	2015
2016	2016
2017	2017
2018	2018
2019	2019
0	2004
2005	2005
2006	2006
2007	2007
2008	2008
2009	2009
2010	2010
2011	2011
2012	2012
2013	2013
2014	2014
2015	2015
2016	2016
2017	2017
2018	2018
2019	2019
0	2004
2005	2005
2006	2006
2007	2007
2008	2008
2009	2009
2010	2010
2011	2011
2012	2012
2013	2013
2014	2014
2015	2015
2016	2016
2017	2017
2018	2018
2019	2019
0	2004
2005	2005
2006	2006
2007	2007
2008	2008
2009	2009
2010	2010
2011	2011
2012	2012
2013	2013
2014	2014
2015	2015
2016	2016
2017	2017
2018	2018
2019	2019
0	2004
2005	2005
2006	2006
2007	2007
2008	2008
2009	2009
2010	2010
2011	2011
2012	2012
2013	2013
2014	2014
2015	2015
2016	2016
2017	2017
2018	2018
2019	2019
0	2004
2005	2005
2006	2006
2007	2007
2008	2008
2009	2009
2010	2010
2011	2011
2012	2012
2013	2013
2014	2014
2015	2015
2016	2016
2017	2017
2018	2018
2019	2019
0	2004
2005	2005
2006	2006
2007	2007
2008	2008
2009	2009
2010	2010
2011	2011
2012	2012
2013	2013
2014	2014
2015	2015
2016	2016
2017	2017
2018	2018
2019	2019
0	2004
2005	2005
2006	2006
2007	2007
2008	2008
2009	2009
2010	2010
2011	2011
2012	2012
2013	2013
2014	2014
2015	2015
2016	2016
2017	2017
2018	2018
2019	2019
0	2004
2005	2005
2006	2006
2007	2007
2008	2008
2009	2009
2010	2010
2011	2011
2012	2012
2013	2013
2014	2014
2015	2015
2016	2016
2017	2017
2018	2018
2019	2019
0	2004
2005	2005
2006	2006
2007	2007
2008	2008
2009	2009
2010	2010
2011	2011
2012	2012
2013	2013
2014	2014
2015	2015
2016	2016
2017	2017
2018	2018
2019	2019
0	2004
2005	2005
2006	2006
2007	2007
2008	2008
2009	2009
2010	2010
2011	2011
2012	2012
2013	2013
2014	2014
2015	2015
2016	2016
2017	2017
2018	2018
2019	2019
0	2004
2005	2005
2006	2006
2007	2007
2008	2008
2009	2009
2010	2010
2011	2011
2012	2012
2013	2013
2014	2014
2015	2015
2016	2016
2017	2017
2018	2018
2019	2019
0	2004
2005	2005
2006	2006
2007	2007
2008	2008
2009	2009
2010	2010
2011	2011
2012	2012
2013	2013
2014	2014
2015	2015
2016	2016
2017	2017
2018	2018
2019	2019
0	2004
2005	2005
2006	2006
2007	2007
2008	2008
2009	2009
2010	2010
2011	2011
2012	2012
2013	2013
2014	2014
2015	2015
2016	2016
2017	2017
2018	2018
2019	2019
0	2004
2005	2005
2006	2006
2007	2007
2008	2008
2009	2009
2010	2010
2011	2011
2012	2012
2013	2013
2014	2014
2015	2015
2016	2016
2017	2017
2018	2018
2019	2019
0	2004
2005	2005
2006	2006
2007	2007
2008	2008
2009	2009
2010	2010
2011	2011
2012	2012
2013	2013
2014	2014
2015	2015
2016	2016
2017	2017
2018	2018
2019	2019
0	2004
2005	2005
2006	2006
2007	2007
2008	2008
2009	2009
2010	2010
2011	2011
2012	2012
2013	2013
2014	2014
2015	2015
2016	2016
2017	2017
2018	2018
2019	2019
0	2004
2005	2005
2006	2006
2007	2007
2008	2008
2009	2009
2010	2010
2011	2011
2012	2012
2013	2013
2014	2014
2015	2015
2016	2016
2017	2017
2018	2018
2019	2019
0	2004
2005	2005
2006	2006
2007	2007
2008	2008
2009	2009
2010	2010
2011	2011
2012	2012
2013	2013
2014	2014
2015	2015
2016	2016
2017	2017
2018	2018
2019	2019
0	2004
2005	2005
2006	2006
2007	2007
2008	2008
2009	2009
2010	2010
2011	2011
2012	2012
2013	2013
2014	2014
2015	2015
2016	2016
2017	2017
2018	2018
2019	2019
0	2004
2005	2005
2006	2006
2007	2007
2008	2008
2009	2009
2010	2010
2011	2011
2012	2012
2013	2013
2014	2014
2015	2015
2016	2016
2017	2017
2018	2018
2019	2019
0	2004
2005	2005
2006	2006
2007	2007
2008	2008
2009	2009
2010	2010
2011	2011
2012	2012
2013	2013
2014	2014
2015	2015
2016	2016
2017	2017
2018	2018
2019	2019
0	2004
2005	2005
2006	2006
2007	2007
2008	2008
2009	2009
2010	2010
2011	2011
2012	2012
2013	2013
2014	2014
2015	2015
2016	2016
2017	2017
2018	2018
2019	2019
0	2004
2005	2005
2006	2006
2007	2007
2008	2008
2009	2009
2010	2010
2011	2011
2012	2012
2013	2013
2014	2014
2015	2015
2016	2016
2017	2017
2018	2018
2019	2019
0	2004
2005	2005
2006	2006
2007	2007
2008	2008
2009	2009
2010	2010
2011	2011
2012	2012
2013	2013
2014	2014
2015	2015
2016	2016
2017	2017
2018	2018
2019	2019
0	2004
2005	2005
2006	2006
2007	2007
2008	2008
2009	2009
2010	2010
2011	2011
2012	2012
2013	2013
2014	2014
2015	2015
2016	2016
2017	2017
2018	2018
2019	2019
0	2004
2005	2005
2006	2006
2007	2007
2008	2008
2009	2009
2010	2010
2011	2011
2012	2012
2013	2013
2014	2014
2015	2015
2016	2016
2017	2017
2018	2018
2019	2019
0	2004
2005	2005
2006	2006
2007	2007
2008	2008
2009	2009
2010	2010
2011	2011
2012	2012
2013	2013
2014	2014
2015	2015
2016	2016
2017	2017
2018	2018
2019	2019
0	2004
2005	2005
2006	2006
2007	2007
2008	2008
2009	2009
2010	2010
2011	2011
2012	2012
2013	2013
2014	2014
2015	2015
2016	2016
2017	2017
2018	2018
2019	2019
0	2004
2005	2005
2006	2006
2007	2007
2008	2008
2009	2009
2010	2010
2011	2011
2012	2012
2013	2013
2014	2014
2015	2015
2016	2016
2017	2017
2018	2018
2019	2019
0	2004
2005	2005
2006	2006
2007	2007
2008	2008
2009	2009
2010	2010
2011	2011
2012	2012
2013	2013
2014	2014
2015	2015
2016	2016
2017	2017
2018	2018
2019	2019
0	2004
2005	2005
2006	2006
2007	2007
2008	2008
2009	2009
2010	2010
2011	2011
2012	2012
2013	2013
2014	2014
2015	2015
2016	2016
2017	2017
2018	2018
2019	2019
0	2004
2005	2005
2006	2006
2007	2007
2008	2008
2009	2009
2010	2010
2011	2011
2012	2012
2013	2013
2014	2014
2015	2015
2016	2016
2017	2017
2018	2018
2019	2019
0	2004
2005	2005
2006	2006
2007	2007
2008	2008
2009	2009
2010	2010
2011	2011
2012	2012
2013	2013
2014	2014
2015	2015
2016	2016
2017	2017
2018	2018
2019	2019
0	2004
2005	2005
2006	2006
2007	2007
2008	2008
2009	2009
2010	2010
2011	2011
2012	2012
2013	2013
2014	2014
2015	2015
2016	2016
2017	2017
2018	2018
2019	2019
0	2004
2005	2005
2006	2006
2007	2007
2008	2008
2009	2009
2010	2010
2011	2011
2012	2012
2013	2013
2014	2014
2015	2015
2016	2016
2017	2017
2018	2018
2019	2019
0	2004
2005	2005
2006	2006
2007	2007
2008	2008
2009	2009
2010	2010
2011	2011
2012	2012
2013	2013
2014	2014
2015	2015
2016	2016
2017	2017
2018	2018
2019	2019
0	2004
2005	2005
2006	2006
2007	2007
2008	2008
2009	2009
2010	2010
2011	2011
2012	2012
2013	2013
2014	2014
2015	2015
2016	2016
2017	2017
2018	2018
2019	2019
0	2004
2005	2005
2006	2006
2007	2007
2008	2008
2009	2009
2010	2010
2011	2011
2012	2012
2013	2013
2014	2014
2015	2015
2016	2016
2017	2017
2018	2018
2019	2019
0	2004
2005	2005
2006	2006
2007	2007
2008	2008
2009	2009
2010	2010
2011	2011
2012	2012
2013	2013
2014	2014
2015	2015
2016	2016
2017	2017
2018	2018
2019	2019
0	2004
2005	2005
2006	2006
2007	2007
2008	2008
2009	2009
2010	2010
2011	2011
2012	2012
2013	2013
2014	2014
2015	2015
2016	2016
2017	2017
2018	2018
2019	2019
0	2004
2005	2005
2006	2006
2007	2007
2008	2008
2009	2009
2010	2010
2011	2011
2012	2012
2013	2013
2014	2014
2015	2015
2016	2016
2017	2017
2018	2018
2019	2019
0	2004
2005	2005
2006	2006
2007	2007
2008	2008
2009	2009
2010	2010
2011	2011
2012	2012
2013	2013
2014	2014
2015	2015
2016	2016
2017	2017
2018	2018
2019	2019
0	2004
2005	2005
2006	2006
2007	2007
2008	2008
2009	2009
2010	2010
2011	2011
2012	2012
2013	2013
2014	2014
2015	2015
2016	2016
2017	2017
2018	2018
2019	2019
0	2004
2005	2005
2006	2006
2007	2007
2008	2008
2009	2009
2010	2010
2011	2011
2012	2012
2013	2013
2014	2014
2015	2015
2016	2016
2017	2017
2018	2018
2019	2019
0	2004
2005	2005
2006	2006
2007	2007
2008	2008
2009	2009
2010	2010
2011	2011
2012	2012
2013	2013
2014	2014
2015	2015
2016	2016
2017	2017
2018	2018
2019	2019
0	2004
2005	2005
2006	2006
2007	2007
2008	2008
2009	2009
2010	2010
2011	2011
2012	2012
2013	2013
2014	2014
2015	2015
2016	2016
2017	2017
2018	2018
2019	2019
0	2004
2005	2005
2006	2006
2007	2007
2008	2008
2009	2009
2010	2010
2011	2011
2012	2012
2013	2013
2014	2014
2015	2015
2016	2016
2017	2017
2018	2018
2019	2019
0	2004
2005	2005
2006	2006
2007	2007
2008	2008
2009	2009
2010	2010
2011	2011
2012	2012
2013	2013
2014	2014
2015	2015
2016	2016
2017	2017
2018	2018
2019	2019
0	2004
2005	2005
2006	2006
2007	2007
2008	2008
2009	2009
2010	2010
2011	2011
2012	2012
2013	2013
2014	2014
2015	2015
2016	2016
2017	2017
2018	2018
2019	2019
0	2004
2005	2005
2006	2006
2007	2007
2008	2008
2009	2009
2010	2010
2011	2011
2012	2012
2013	2013
2014	2014
2015	2015
2016	2016
2017	2017
2018	2018
2019	2019
0	2004
2005	2005
2006	2006
2007	2007
2008	2008
2009	2009
2010	2010
2011	2011
2012	2012
2013	2013
2014	2014
2015	2015
2016	2016
2017	2017
2018	2018
2019	2019
0	2004
2005	2005
2006	2006
2007	2007
2008	2008
2009	2009
2010	2010
2011	2011
2012	2012
2013	2013
2014	2014
2015	2015
2016	2016
2017	2017
2018	2018
2019	2019
0	2004
2005	2005
2006	2006
2007	2007
2008	2008
2009	2009
2010	2010
2011	2011
2012	2012
2013	2013
2014	2014
2015	2015
2016	2016
2017	2017
2018	2018
2019	2019
0	2004
2005	2005
2006	2006
2007	2007
2008	2008
2009	2009
2010	2010
2011	2011
2012	2012
2013	2013
2014	2014
2015	2015
2016	2016
2017	2017
2018	2018
2019	2019
0	2004
2005	2005
2006	2006
2007	2007
2008	2008
2009	2009
2010	2010
2011	2011
2012	2012
2013	2013
2014	2014
2015	2015
2016	2016
2017	2017
2018	2018
2019	2019
0	2004
2005	2005
2006	2006
2007	2007
2008	2008
2009	2009
2010	2010
2011	2011
2012	2012
2013	2013
2014	2014
2015	2015
2016	2016
2017	2017
2018	2018
2019	2019
0	2004
2005	2005
2006	2006
2007	2007
2008	2008
2009	2009
2010	2010
2011	2011
2012	2012
2013	2013
2014	2014
2015	2015
2016	2016
2017	2017
2018	2018
2019	2019
0	2004
2005	2005
2006	2006
2007	2007
2008	2008
2009	2009
2010	2010
2011	2011
2012	2012
2013	2013
2014	2014
2015	2015
2016	2016
2017	2017
2018	2018
2019	2019
0	2004
2005	2005
2006	2006
2007	2007
2008	2008
2009	2009
2010	2010
2011	2011
2012	2012
2013	2013
2014	2014
2015	2015
2016	2016
2017	2017
2018	2018
2019	2019
0	2004
2005	2005
2006	2006
2007	2007
2008	2008
2009	2009
2010	2010
2011	2011
2012	2012
2013	2013
2014	2014
2015	2015
2016	2016
2017	2017
2018	2018
2019	2019
0	2004
2005	2005
2006	2006
2007	2007
2008	2008
2009	2009
2010	2010
2011	2011
2012	2012
2013	2013
2014	2014
2015	2015
2016	2016
2017	2017
2018	2018
2019	2019
0	2004
2005	2005
2006	2006
2007	2007
2008	2008
2009	2009
2010	2010
2011	2011
2012	2012
2013	2013
2014	2014
2015	2015
2016	2016
2017	2017
2018	2018
2019	2019
0	2004
2005	2005
2006	2006
2007	2007
2008	2008
2009	2009
2010	2010
2011	2011
2012	2012
2013	2013
2014	2014
2015	2015
2016	2016
2017	2017
2018	2018
2019	2019
0	2004
2005	2005
2006	2006
2007	2007
2008	2008
2009	2009
2010	2010
2011	2011
2012	2012
2013	2013
2014	2014
2015	2015
2016	2016
2017	2017
2018	2018
2019	2019
0	2004
2005	2005
2006	2006
2007	2007
2008	2008
2009	2009
2010	2010
2011	2011
2012	2012
2013	2013
2014	2014
2015	2015
2016	2016
2017	2017
2018	2018
2019	2019
0	2004
2005	2005
2006	2006
2007	2007
2008	2008
2009	2009
2010	2010
2011	2011
2012	2012
2013	2013
2014	2014
2015	2015
2016	2016
2017	2017
2018	2018
2019	2019
0	2004
2005	2005
2006	2006
2007	2007
2008	2008
2009	2009
2010	2010
2011	2011
2012	2012
2013	2013
2014	2014
2015	2015
2016	2016
2017	2017
2018	2018
2019	2019
0	2004
2005	2005
2006	2006
2007	2007
2008	2008
2009	2009
2010	2010
2011	2011
2012	2012
2013	2013
2014	2014
2015	2015
2016	2016
2017	2017
2018	2018
2019	2019
0	2004
2005	2005
2006	2006
2007	2007
2008	2008
2009	2009
2010	2010
2011	2011
2012	2012
2013	2013
2014	2014
2015	2015
2016	2016
2017	2017
2018	2018
2019	2019
0	2004
2005	2005
2006	2006
2007	2007
2008	2008
2009	2009
2010	2010
2011	2011
2012	2012
2013	2013
2014	2014
2015	2015
2016	2016
2017	2017
2018	2018
2019	2019
0	2004
2005	2005
2006	2006
2007	2007
2008	2008
2009	2009
2010	2010
2011	2011
2012	2012
2013	2013
2014	2014
2015	2015
2016	2016
2017	2017
2018	2018
2019	2019
0	2004
2005	2005
2006	2006
2007	2007
2008	2008
2009	2009
2010	2010
2011	2011
2012	2012
2013	2013
2014	2014
2015	2015
2016	2016
2017	2017
2018	2018
2019	2019
0	2004
2005	2005
2006	2006
2007	2007
2008	2008
2009	2009
2010	2010
2011	2011
2012	2012
2013	2013
2014	2014
2015	2015
2016	2016
2017	2017
2018	2018
2019	2019
0	2004
2005	2005
2006	2006
2007	2007
2008	2008
2009	2009
2010	2010
2011	2011
2012	2012
2013	2013
2014	2014
2015	2015
2016	2016
2017	2017
2018	2018
2019	2019
0	2004
2005	2005
2006	2006
2007	2007
2008	2008
2009	2009
2010	2010
2011	2011
2012	2012
2013	2013
2014	2014
2015	2015
2016	2016
2017	2017
2018	2018
2019	2019
0	2004
2005	2005
2006	2006
2007	2007
2008	2008
2009	2009
2010	2010
2011	2011
2012	2012
2013	2013
2014	2014
2015	2015
2016	2016
2017	2017
2018	2018
2019	2019
0	2004
2005	2005
2006	2006
2007	2007
2008	2008
2009	2009
2010	2010
2011	2011
2012	2012
2013	2013
2014	2014
2015	2015
2016	2016
2017	2017
2018	2018
2019	2019
0	2004
2005	2005
2006	2006
2007	2007
2008	2008
2009	2009
2010	2010
2011	2011
2012	2012
2013	2013
2014	2014
2015	2015
2016	2016
2017	2017
2018	2018
2019	2019
0	2004
2005	2005
2006	2006
2007	2007
2008	2008
2009	2009
2010	2010
2011	2011
2012	2012
2013	2013
2014	2014
2015	2015
2016	2016
2017	2017
2018	2018
2019	2019
0	2004
2005	2005
2006	2006
2007	2007
2008	2008
2009	2009
2010	2010
2011	2011
2012	2012
2013	2013
2014	2014
2015	2015
2016	2016
2017	2017
2018	2018
2019	2019
0	2004
2005	2005
2006	2006
2007	2007
2008	2008
2009	2009
2010	2010
2011	2011
2012	2012
2013	2013
2014	2014
2015	2015
2016	2016
2017	2017
2018	2018
2019	2019
0	2004
2005	2005
2006	2006
2007	2007
2008	2008
2009	2009
2010	2010
2011	2011
2012	2012
2013	2013
2014	2014
2015	2015
2016	2016
2017	2017
2018	2018
2019	2019
0	2004
2005	2005
2006	2006
2007	2007
2008	2008
2009	2009
2010	2010
2011	2011
2012	2012
2013	2013
2014	2014
2015	2015
2016	2016
2017	2017
2018	2018
2019	2019
0	2004
2005	2005
2006	2006
2007	2007
2008	2008
2009	2009
2010	2010
2011	2011
2012	2012
2013	2013
2014	2014
2015	2015
2016	2016
2017	2017
2018	2018
2019	2019
0	2004
2005	2005
2006	2006
2007	2007
2008	2008
2009	2009
2010	2010
2011	2011
2012	2012
2013	2013
2014	2014
2015	2015
2016	2016
2017	2017
2018	2018
2019	2019
0	2004
2005	2005
2006	2006
2007	2007
2008	2008
2009	2009
2010	2010
2011	2011
2012	2012
2013	2013
2014	2014
2015	2015
2016	2016
2017	2017
2018	2018
2019	2019
0	2004
2005	2005
2006	2006
2007	2007
2008	2008
2009	2009
2010	2010
2011	2011
2012	2012
2013	2013
2014	2014
2015	2015
2016	2016
2017	2017
2018	2018
2019	2019
0	2004
2005	2005
2006	2006
2007	2007
2008	2008
2009	2009
2010	2010
2011	2011
2012	2012
2013	2013
2014	2014
2015	2015
2016	2016
2017	2017
2018	2018
2019	2019
0	2004
2005	2005
2006	2006
2007	2007
2008	2008
2009	2009
2010	2010
2011	2011
2012	2012
2013	2013
2014	2014
2015	2015
2016	2016
2017	2017
2018	2018
2019	2019
0	2004
2005	2005
2006	2006
2007	2007
2008	2008
2009	2009
2010	2010
2011	2011
2012	2012
2013	2013
2014	2014
2015	2015
2016	2016
2017	2017
2018	2018
2019	2019
0	2004
2005	2005
2006	2006
2007	2007
2008	2008
2009	2009
2010	2010
2011	2011
2012	2012
2013	2013
2014	2014
2015	2015
2016	2016
2017	2017
2018	2018
2019	2019
0	2004
2005	2005
2006	2006
2007	2007
2008	2008
2009	2009
2010	2010
2011	2011
2012	2012
2013	2013
2014	2014
2015	2015
2016	2016
2017	2017
2018	2018
2019	2019
0	2004
2005	2005
2006	2006
2007	2007
2008	2008
2009	2009
2010	2010
2011	2011
2012	2012
2013	2013
2014	2014
2015	2015
2016	2016
2017	2017
2018	2018
2019	2019
0	2004
2005	2005
2006	2006
2007	2007
2008	2008
2009	2009
2010	2010
2011	2011
2012	2012
2013	2013
2014	2014
2015	2015
2016	2016
2017	2017
2018	2018
2019	2019
0	2004
2005	2005
2006	2006
2007	2007
2008	2008
2009	2009
2010	2010
2011	2011
2012	2012
2013	2013
2014	2014
2015	2015
2016	2016
2017	2017
2018	2018
2019	2019
0	2004
2005	2005
2006	2006
2007	2007
2008	2008
2009	2009
2010	2010
2011	2011
2012	2012
2013	2013
2014	2014
2015	2015
2016	2016
2017	2017
2018	2018
2019	2019
0	2004
2005	2005
2006	2006
2007	2007
2008	2008
2009	2009
2010	2010
2011	2011
2012	2012
2013	2013
2014	2014
2015	2015
2016	2016
2017	2017
2018	2018
2019	2019
0	2004
2005	2005
2006	2006
2007	2007
2008	2008
2009	2009
2010	2010
2011	2011
2012	2012
2013	2013
2014	2014
2015	2015
2016	2016
2017	2017
2018	2018
2019	2019
0	2004
2005	2005
2006	2006
2007	2007
2008	2008
2009	2009
2010	2010
2011	2011
2012	2012
2013	2013
2014	2014
2015	2015
2016	2016
2017	2017
2018	2018
2019	2019
0	2004
2005	2005
2006	2006
2007	2007
2008	2008
2009	2009
2010	2010
2011	2011
2012	2012
2013	2013
2014	2014
2015	2015
2016	2016
2017	2017
2018	2018
2019	2019
0	2004
2005	2005
2006	2006
2007	2007
2008	2008
2009	2009
2010	2010
2011	2011
2012	2012
2013	2013
2014	2014
2015	2015
2016	2016
2017	2017
2018	2018
2019	2019
0	2004
2005	2005
2006	2006
2007	2007
2008	2008
2009	2009
2010	2010
2011	2011
2012	2012
2013	2013
2014	2014
2015	2015
2016	2016
2017	2017
2018	2018
2019	2019
0	2004
2005	2005
2006	2006
2007	2007
2008	2008
2009	2009
2010	2010
2011	2011
2012	2012
2013	2013
2014	2014
2015	2015
2016	2016
2017	2017
2018	2018
2019	2019
0	2004
2005	2005
2006	2006
2007	2007
2008	2008
2009	2009
2010	2010
2011	2011
2012	2012
2013	2013
2014	2014
2015	2015
2016	2016
2017	2017
2018	2018
2019	2019
0	2004
2005	2005
2006	2006
2007	2007
2008	2008
2009	2009
2010	2010
2011	2011
2012	2012
2013	2013
2014	2014
2015	2015
2016	2016
2017	2017
2018	2018
2019	2019
0	2004
2005	2005
2006	2006
2007	2007
2008	2008
2009	2009
2010	2010
2011	2011
2012	2012
2013	2013
2014	2014
2015	2015
2016	2016
2017	2017
2018	2018
2019	2019
0	2004
2005	2005
2006	2006
2007	2007
2008	2008
2009	2009
2010	2010
2011	2011
2012	2012
2013	2013
2014	2014
2015	2015
2016	2016
2017	2017
2018	2018
2019	2019
0	2004
2005	2005
2006	2006
2007	2007
2008	2008
2009	2009
2010	2010
2011	2011
2012	2012
2013	2013
2014	2014
2015	2015
2016	2016
2017	2017
2018	2018
2019	2019
0	2004
2005	2005
2006	2006
2007	2007
2008	2008
2009	2009
2010	2010
2011	2011
2012	2012
2013	2013
2014	2014
2015	2015
2016	2016
2017	2017
2018	2018
2019	2019
0	2004
2005	2005
2006	2006
2007	2007
2008	2008
2009	2009
2010	2010
2011	2011
2012	2012
2013	2013
2014	2014
2015	2015
2016	2016
2017	2017
2018	2018
2019	2019
0	2004
2005	2005
2006	2006
2007	2007
2008	2008
2009	2009
2010	2010
2011	2011
2012	2012
2013	2013
2014	2014
2015	2015
2016	2016
2017	2017
2018	2018
2019	2019
0	2004
2005	2005
2006	2006
2007	2007
2008	2008
2009	2009
2010	2010
2011	2011
2012	2012
2013	2013
2014	2014
2015	2015
2016	2016
2017	2017
2018	2018
2019	2019
0	2004
2005	2005
2006	2006
2007	2007
2008	2008
2009	2009
2010	2010
2011	2011
2012	2012
2013	2013
2014	2014
2015	2015
2016	2016
2017	2017
2018	2018
2019	2019
0	2004
2005	2005
2006	2006
2007	2007
2008	2008
2009	2009
2010	2010
2011	2011
2012	2012
2013	2013
2014	2014
2015	2015
2016	2016
2017	2017
2018	2018
2019	2019
[truncated: 2,544 more rows]
